# Supplementary material for: Highly efficient luminescence from boron β-dialdiminates and their π-conjugated polymers in both solutions and solids: significant impact of the substituent position on luminescence behavior
Source: Royal Society of Chemistry journal article supplement (doi:10.1039/d3qm00761h), 2023-01-01
Supplement: d3qm00761h1.pdf [file d3qm00761h1.pdf]

*Supporting Information*

## ***Supporting Information***

# Highly Efficient Luminescence from Boron $\beta$ - Dialdiminates and Their $\pi$ -Conjugated Polymers in Both Solutions and Solids: Significant Impact of Substituent Position on Luminescence Behavior

*Shunichiro Ito,<sup>1</sup> Miyako Hashizume,<sup>1</sup> Hideo Taka,<sup>2</sup> Hiroshi Kita,<sup>2</sup> Kazuo Tanaka<sup>1\*</sup> and Yoshiki Chujo<sup>1</sup>*

<sup>1</sup>Department of Polymer Chemistry, Graduate School of Engineering, Kyoto University, Katsura,  
Nishikyo-ku, Kyoto 615-8510, Japan

<sup>2</sup>Konica Minolta, Inc., 2970 Ishikawa-machi, Hachiojishi, Tokyo 192-8505, Japan

E-mail: [tanaka@poly.synchem.kyoto-u.ac.jp](mailto:tanaka@poly.synchem.kyoto-u.ac.jp)

## Table of Contents

|                                                           |    |
|-----------------------------------------------------------|----|
| <i>Measurements</i> .....                                 | 3  |
| <i>Materials</i> .....                                    | 6  |
| <i>Photocyclization of DKI-4Ph</i> .....                  | 17 |
| <i>SEC Profile</i> .....                                  | 18 |
| <i>Photophysical Properties</i> .....                     | 19 |
| <i>Cyclic Voltammetry</i> .....                           | 25 |
| <i>Theoretical Calculations</i> .....                     | 26 |
| <i>NMR Spectra</i> .....                                  | 29 |
| <i>Optimized Geometry and Calculated Properties</i> ..... | 47 |
| <i>References</i> .....                                   | 73 |

## Measurements

### NMR Spectroscopy

$^1\text{H}$  (400 MHz),  $^{13}\text{C}\{^1\text{H}\}$  (101 MHz) and  $^{11}\text{B}\{^1\text{H}\}$  (128 MHz) NMR spectra were recorded on a JEOL JNM-AL400 spectrometer. Heteronuclear multiple quantum coupling (HMQC,  $^1\text{H}$ - $^{13}\text{C}$ ) and heteronuclear multiple bond coupling (HMBC,  $^1\text{H}$ - $^{13}\text{C}$ ) spectra were recorded on a JEOL JNM-ECZ600R spectrometer. In  $^1\text{H}$  and  $^{13}\text{C}\{^1\text{H}\}$  spectra, tetramethylsilane (TMS) was used as an internal standard in  $\text{CDCl}_3$ . In other solvents ( $\text{CD}_2\text{Cl}_2$  and  $\text{DMSO}-d_6$ ), the residual solvent peaks were used as an internal standard.  $^{11}\text{B}\{^1\text{H}\}$  NMR spectra were referenced externally to  $\text{BF}_3 \cdot \text{OEt}_2$  (sealed capillary). The following abbreviations are used: s, singlet; d, doublet; t, triplet; m, multiplet; br, broad; dd, double doublet; tt, triplet of triplets.

### Mass Spectrometry and Elemental Analysis

High-resolution mass (HRMS) spectrometry was conducted at the Technical Support Office (Department of Synthetic Chemistry and Biological Chemistry, Graduate School of Engineering, Kyoto University). HRMS spectra were obtained on a Thermo Fisher Scientific EXACTIVE Plus spectrometer for electrospray ionization (ESI) and for atmospheric-pressure chemical ionization (APCI) and a Burkert Daltonics Ultraflex III for matrix-assisted laser desorption ionization time-of-flight mass spectrometry (MALDI-TOF MS).

Elemental analysis was conducted at the Microanalytical Center of Kyoto University using one of the following micro corders: MT-5 (Yanaco Co., Ltd.), MT-6 (Yanaco Co., Ltd.), JM10 (J-Science Lab Co., Ltd.), and JM11 (J-Science Lab Co., Ltd.) for C, H, and N analysis.

### Silica Gel Chromatography

Analytical thin-layer chromatography was performed with  $\text{SiO}_2$  60 Merck  $\text{F}_{254}$  plates. Column chromatography was performed with Wakogel C-300  $\text{SiO}_2$  (Wako).

### Size-Exclusion Chromatography

Number-average molecular weight ( $M_n$ ) and molecular weight distribution ( $D = M_w/M_n$ ) values of all polymers were estimated by size exclusion chromatography (SEC) with a TOSOH 8020 series (a dual pump system (DP-8020), a column oven (CO-8020), and a degasser (SD-8020)) equipped with three consecutive polystyrene gel columns (TSKgel: G4000H, G3000H and G2000H) and a refractive-index (RI-8020) and an ultraviolet detector (UV-8020) at 40 °C. The system was operated at a flow rate of 1.0 mL/min with  $\text{CHCl}_3$  as an eluent. Polystyrene standards were employed for calibration.

### **High-Performance Liquid Chromatography**

Recyclable preparative high-performance liquid chromatography (HPLC) was performed with Japan Analytical Industry Model LaboACE LC-5060 (JAIGEL-2.5H and 3HH columns) using  $\text{CHCl}_3$  as an eluent.

### **Thermal Analysis**

Thermogravimetric analysis (TGA) was performed on an EXSTAR TG/DTA6220, Seiko Instrument, Inc., with the heating rate of 10 °C/min up from 40 to 500 °C under nitrogen flowing (200 mL/min). Residual water was removed by keeping on an aluminum pan at 100 °C for 30 min before the curve profiling. The decomposition temperatures ( $T_d$ ) were determined from the onset of the weight loss. Differential scanning calorimetry (DSC) was carried out on a SII DSC 6220 instrument by using about 5 mg of exactly weighed samples at heating rate of 10 °C/min.

### **Photophysical Measurements**

UV-vis absorption spectra were recorded on a SHIMADZU UV-3600 spectrophotometer. Fluorescence and phosphorescence emission spectra and phosphorescence decay were measured with a HORIBA JOBIN YVON Fluorolog-3 spectrofluorometer and an Oxford Optistat DN cryostat for temperature control. Absolute photoluminescence quantum yields were measured with a Hamamatsu Photonics Quantaurus-QY Plus C13534-01 spectrophotometer and a sample holder for low temperature, A11238-05, was used for the measurements at 77 K. Photoluminescence (PL) lifetimes were measured

by a Horiba FluoroCube spectrofluorometer system with an Oxford Optistat DN cryostat for temperature control and a UV diode laser (NanoLED 375 nm).

### **X-Ray Diffraction**

Wide-angle X-ray diffraction (WAXD) patterns were taken by using Cu K $\alpha$  radiation with a Rigaku SmartLab X-ray Diffractometer. For polymers, X-ray incident angle was fixed at 1.0° for grazing-incidence measurements. In out-of-plane measurements, diffraction patterns were taken in  $2\theta$  range from 3° to 30° by continuous scanning with a step size of 0.01°. In in-plane measurements, diffraction patterns were taken in  $2\theta/\varphi$  range from 3° to 30° by continuous scanning with a step size of 0.008°.

### **Film Thickness Measurement**

Film thickness was measured with a Bruker DektakXT profilometer.

### **Device Fabrication**

Glass substrates coated with a 100-nm thin layer of indium tin oxide (ITO) were cleaned by ultrasonication with isopropyl alcohol, purged with nitrogen, and washed with UV ozone for 5 min. The hole-injecting layer was prepared by the ink-jet printing method with a PEDOT:PSS dispersion (2 wt% in isopropyl alcohol), then dried at 80 °C for 5 min. TCTA, *m*CP:**DAI-Tol**, TPBi, LiF, and Al were subsequently deposited by thermal evaporation.

## Materials

All reactions were performed under argon atmosphere unless otherwise noted. Phenylacetyl chloride (Tokyo Chemical Industry Co., Ltd.; TCI), POCl<sub>3</sub> (Tokyo Chemical Industry Co., Ltd.; TCI), NaClO<sub>4</sub> (FUJIFILM Wako Pure Chemicals Corporation; Wako), *p*-tolylacetic acid (TCI), HPF<sub>6</sub> aq. (60 wt%, Wako), NaOH (Wako), aniline (TCI), benzylamine (TCI), 1,1,3,3-tetramethoxypropane (TCI), HCl aq. (1 M, Wako), BF<sub>3</sub>·OEt<sub>2</sub> (Sigma-Aldrich Co. LLC.), deoxygenated toluene (Wako), deoxygenated dimethylformamide (DMF, Wako), dichloromethane (DCM, Wako), 2-propanol (Wako), methanol (Wako), hexane (Wako), chloroform (Wako), and cyclopentyl methyl ether (Wako) were purchased from commercial sources and used as received. Deoxygenated diethyl ether (Wako), and triethyl amine (Kanto Chemical Co., Inc) were purified using a two-column solid-state purification system (Glasscontour System, Joerg Meyer, Irvine, CA). **DKI-4Ph**<sup>[1]</sup> and **DKI-5Ph**<sup>[2]</sup> were synthesized according to the literature.

### Synthesis of Vin-Ph:

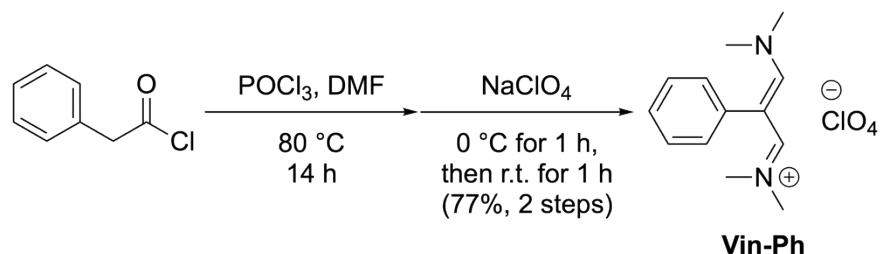

POCl<sub>3</sub> (6.1 mL, 65 mmol) was added to DMF (12 mL, 162 mmol) dropwise for 40 min. The deep red Vilsmeier reagent's solution was allowed to cool to 0 °C. Phenylacetyl chloride (5.0 g, 32 mmol) was added dropwise to the solution for 20 min. The reddish orange solution was warmed to 80 °C and stirred for 14 h. The deep brown solution was cooled to 0 °C and diluted with DCM (20 mL). The reaction mixture was added dropwise to the precooled solution of NaClO<sub>4</sub> (4.36 g, 36 mmol) in water (140 mL). The precipitate was collected with suction filtration, washed with water and Et<sub>2</sub>O, and dried under vacuum, affording the pure product as a pale-yellow powder (7.58 g, 77%). <sup>1</sup>H NMR (400 MHz; CD<sub>2</sub>Cl<sub>2</sub>):

$\delta = 7.73$  (s, 2H, >N-CH=C), 7.43–7.41 (m, 3H, Ar), 7.30–7.27 (m, 2H, Ar), 3.31 (s, 6H, NCH<sub>3</sub>), 2.46 (s, 6H, NCH<sub>3</sub>). <sup>13</sup>C{<sup>1</sup>H} NMR (101 MHz; CD<sub>2</sub>Cl<sub>2</sub>):  $\delta$  163.7, 132.5, 132.4, 129.1, 128.8, 106.2, 101.7, 49.1, 39.7. HRMS (ESI) [M]<sup>+</sup>; Found: 203.1542. Calcd.: 203.1543.

### Synthesis of Vin-Tol:

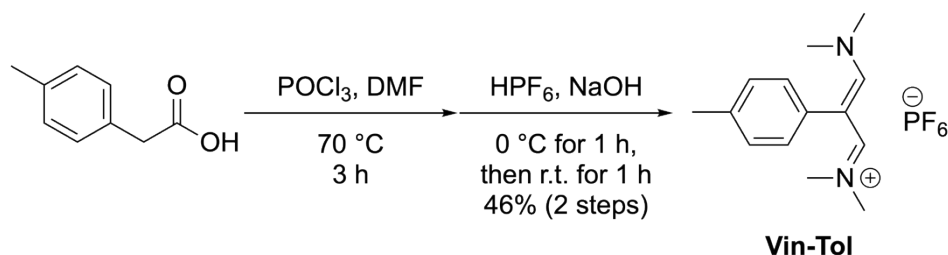

To a mixture of *p*-tolylacetic acid (9.8 g, 65 mmol) and DMF (28 mL, 366 mmol) was added POCl<sub>3</sub> (6.1 mL, 65 mmol) dropwise over 10 min at 70 °C under nitrogen flow. After stirring at 70 °C for 3 h, the reddish brown solution was allowed to cool to r.t. The reaction mixture and 5 M NaOH aq. (18 mL) were simultaneously added dropwise to a solution of NaOH (7.0 g, 174 mmol) and HPF<sub>6</sub> aq. (60 wt%, 10.4 mL, 70 mmol) in water (130 mL) over 1 h at a temperature below 10 °C. The mixture was stirred at r.t. for 1 h, then filtered and the filtrate washed with water to give a yellow solid. The residue was purified by recrystallization from the mixed solvent of 2-propanol and water (1/4, v/v) affording the analytically pure product as a yellow solid (10.8 g, 46% yield). <sup>1</sup>H NMR (400 MHz; CDCl<sub>3</sub>):  $\delta = 7.62$  (s, 2H, >N-CH=C), 7.20 (d, 2H, Ar, <sup>3</sup>J<sub>H-H</sub> = 8.1 Hz), 7.13 (d, 2H, Ar, <sup>3</sup>J<sub>H-H</sub> = 8.1 Hz), 3.30 (s, 6H, NCH<sub>3</sub>), 2.48 (s, 6H, NCH<sub>3</sub>), 2.39 (s, 3H, Ar-CH<sub>3</sub>). <sup>13</sup>C{<sup>1</sup>H} NMR (101 MHz; CDCl<sub>3</sub>):  $\delta = 163.7$ , 139.1, 132.0, 129.4, 128.7, 105.8, 49.0, 39.5, 21.1. HRMS (ESI) [M]<sup>+</sup>; Found: 217.1697. Calcd.: 217.1699.

### General procedure for the synthesis of proligands

A solution of a vinamidinium salt and a primary amine (2.2 eq.) in methanol (0.1 M for proligand) was heated to the reflux temperature and stirred for *ca.* 24 h. Further purification was carried as shown in each compound section.

### Synthesis of DAI-3Ph\_L:

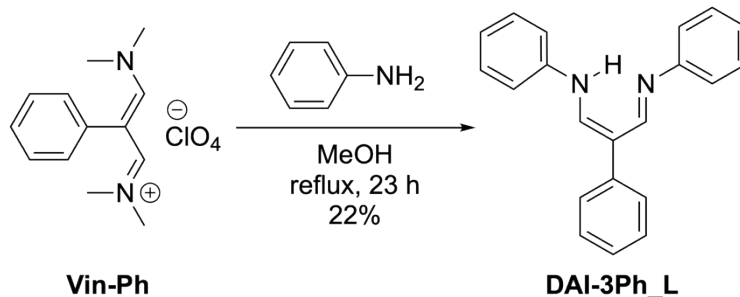

**Vin-Ph** (1.5 g, 5.0 mmol) and aniline (1.0 mL, 11 mmol) were used. The suspension was filtered and washed with cold methanol and hexane, then the analytically pure product was obtained as a yellow powder (0.33 g, 22%).  $^1\text{H}$  NMR (400 MHz;  $\text{CD}_2\text{Cl}_2$ )  $\delta$  = 12.84 (s, 1H, NH), 8.11 (s, 2H, >N-CH=C), 7.43–7.35 (m, 8H), 7.24 (tt,  $J$  = 7.1, 1.6 Hz, 1H), 7.19 (dd,  $J$  = 8.5, 1.0 Hz, 4H), 7.11 (tt,  $J$  = 7.4, 1.1 Hz, 2H).  $^{13}\text{C}\{^1\text{H}\}$  NMR (101 MHz;  $\text{CDCl}_3$ ):  $\delta$  = 149.2, 146.5, 140.2, 129.4, 128.7, 126.0, 125.5, 123.8, 118.4, 109.6. HRMS (ESI)  $[\text{M}+\text{H}]^+$ ; Found: 299.1546. Calcd.: 299.1543.

### Synthesis of DAI-Tol\_L:

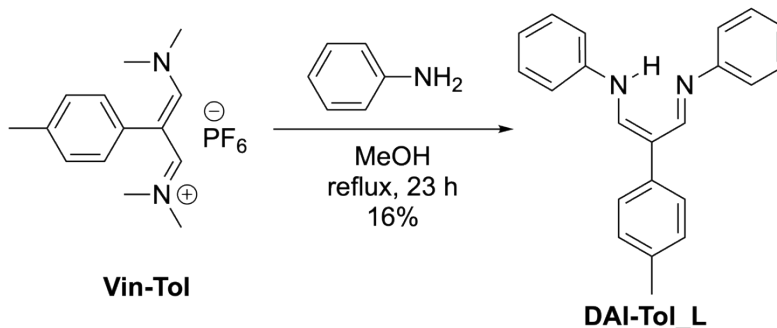

**Vin-Tol** (5.0 g, 14 mmol) and aniline (2.8 mL, 30 mmol) were used. After cooling to r.t., yellow precipitate appeared. The suspension was filtered and washed with cold methanol and hexane, then the analytically pure product was obtained as a yellow powder (0.68 g, 16% yield).  $^1\text{H}$  NMR (400 MHz;  $\text{CDCl}_3$ )  $\delta$  = 12.82 (s, 1H, NH), 8.04 (s, 2H, >N-CH=C), 7.38–7.33 (m, 4H), 7.30–7.27 (m, 2H), 7.19 (d,  $J$  = 7.9 Hz, 2H), 7.15 (dt,  $J$  = 8.5, 1.6 Hz, 4H), 7.10 (tt,  $J$  = 7.3, 1.0 Hz, 2H), 2.37 (s, 3H,  $\text{CH}_3$ ).  $^{13}\text{C}\{^1\text{H}\}$



NMR (101 MHz; CDCl<sub>3</sub>):  $\delta$  = 149.1, 146.5, 137.3, 135.2, 129.4, 129.4, 126.0, 123.7, 118.3, 109.5, 21.0.

HRMS (ESI) [M+H]<sup>+</sup>; Found: 313.1701. Calcd.: 313.1701.

### Synthesis of DAI-Bn\_L:

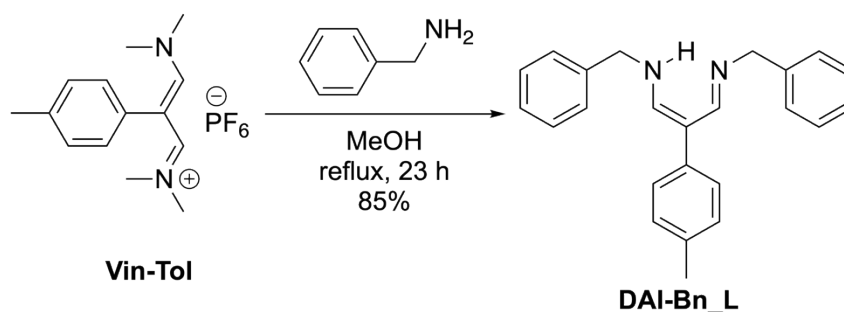

**Vin-Tol** (1.0 g, 2.8 mmol) and benzylamine (0.66 mL, 0.65 g, 6.1 mmol) were used. After cooling to r.t., the reaction mixture was concentrated with a rotary evaporator. The crude product was purified by a silica gel flash column chromatography with CHCl<sub>3</sub>/MeOH (20/1, v/v, *R<sub>f</sub>* ~ 0.3 (broad)) as an eluent. The product was obtained as a yellow powder involving unknown impurities (0.80 g, 85% crude yield). The crude product was used for the following synthesis without further purification. <sup>1</sup>H NMR (400 MHz; CDCl<sub>3</sub>)  $\delta$  = 8.03 (s, 2H, >N-CH=C), 7.35–7.23 (m, 12H, Ar), 7.06 (d, *J* = 7.9 Hz, 2H, Ar), 6.51 (s, 1H, NH), 4.59 (s, 4H, CH<sub>2</sub>), 2.32 (s, 3H, CH<sub>3</sub>). <sup>13</sup>C {<sup>1</sup>H} NMR (101 MHz; CDCl<sub>3</sub>):  $\delta$  = 162.9, 140.2, 134.8, 131.7, 130.8, 129.4, 129.2, 128.7, 128.0, 108.0, 53.6, 21.2 HRMS (ESI) [M+H]<sup>+</sup>; Found: 341.2017. Calcd.: 341.2012.

### Synthesis of DAI-3Ph-I\_L:

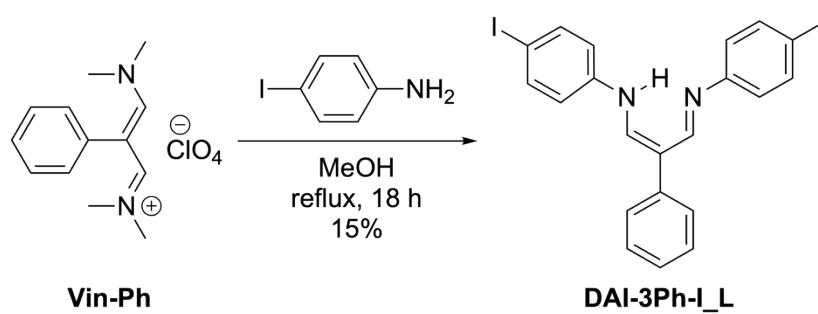

**Vin-Ph** (1.5 g, 5.0 mmol) and *p*-iodoaniline (2.4 g, 11 mmol) were used. The cooled suspension was filtered and washed with cold methanol. The filtrate were purified by recrystallization from hexane to afford the analytically pure product as an orange powder (0.40 g, 15% yield).  $^1\text{H}$  NMR (400 MHz;  $\text{CD}_2\text{Cl}_2$ ):  $\delta$  = 12.81 (s, 1 H, *NH*), 8.05 (s, 2H,  $>\text{N}-\text{CH}=\text{C}$ ), 7.4 (d,  $J$  = 8.79 Hz, 4H, Ar), 7.39–7.38 (m, 4H, Ar), 7.26 (m, 1H, Ar), 6.96 (d,  $J$  = 8.79 Hz, 4H, Ar).  $^{13}\text{C}\{^1\text{H}\}$  NMR (101 MHz;  $\text{CDCl}_3$ ): 149.16 ( $\text{N}=\text{C}$ ), 145.95, 139.66, 138.36, 128.84, 126.17, 125.95, 120.36, 110.6, 87.12. HRMS (ESI)  $[\text{M}+\text{H}]^+$ ; Found: 550.9471, Calcd.: 550.9476.

### Synthesis of DAI-2Ph\_L:

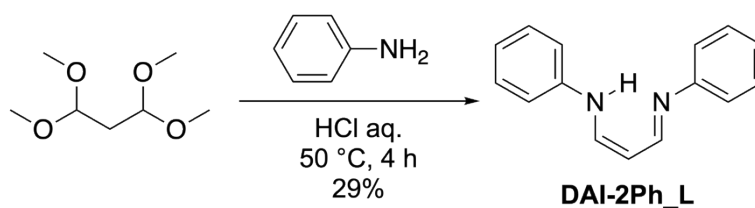

To a solution of 1,1,3,3-tetramethoxypropane (4.0 mL, 4.0 g, 24 mmol) in 0.5 M HCl aq. (63 mL) was added a solution of aniline (4.5 mL, 4.5 g, 49 mmol) in 0.5 M HCl aq. (87 mL) at 50 °C. The orange suspension was stirred at 50 °C for 4 h. The precipitate was collected with suction filtration and washed with water,  $\text{Et}_2\text{O}$ , cyclopentyl methyl ether, and hexane. The crude orange solid was purified with recrystallization from methanol, affording the pure product as an orange powder (1.5 g, 29%).  $^1\text{H}$  NMR (400 MHz;  $\text{DMSO}-d_6$ )  $\delta$  = 12.43 (s, 2H, *NH*), 8.80 (d,  $J$  = 10.3 Hz, 2H,  $>\text{N}-\text{CH}=\text{C}$ ), 7.49 (t,  $J$  = 7.7 Hz, 5H, Ar), 7.40 (d,  $J$  = 8.2 Hz, 4H, Ar), 7.27 (t,  $J$  = 7.2 Hz, 2H, Ar), 6.39 (t,  $J$  = 11.0 Hz, 1H,  $-\text{CH}=\text{CH}-\text{CH}=\text{}$ ).  $^{13}\text{C}\{^1\text{H}\}$  NMR (101 MHz;  $\text{DMSO}$ ):  $\delta$  158.4, 138.7, 129.8, 125.8, 117.4, 98.6. HRMS (APCI)  $[\text{M}+\text{H}]^+$ ; Found: 223.1226. Calcd.: 223.1230.

### General procedure for the synthesis of a boron complex

To a solution of a proligand and triethylamine in toluene (0.1 M for a proligand) was added  $\text{BF}_3 \cdot \text{OEt}_2$  (10 eq.) and stirred for 6 h at 100 °C. After cooling to r.t., the reaction mixture was poured into water and extracted with toluene until the aqueous layer showed no emission under UV (375 nm) irradiation. The combined organic layer was washed with water and brine, dried over  $\text{MgSO}_4$ , filtered, and then the filtrate was concentrated under reduced pressure to give a crude product. Further purification was carried as shown in each compound section.

### Synthesis of DAI-3Ph:

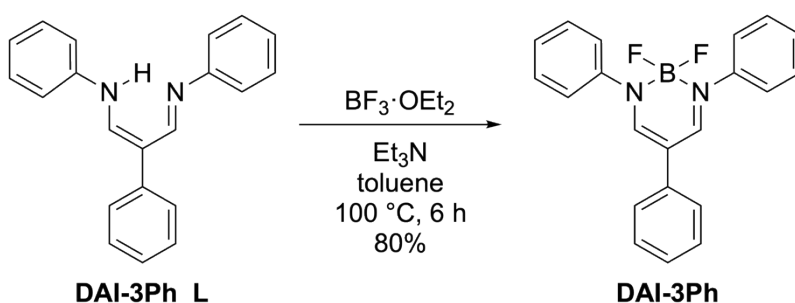

**DAI-3Ph<sub>L</sub>** (0.33 g, 1.1 mmol), triethylamine (0.31 mL, 2.2 mmol) and  $\text{BF}_3 \cdot \text{OEt}_2$  (1.4 mL, 11 mmol) were used. The crude product was purified by recrystallization from the mixed solvent of  $\text{CH}_2\text{Cl}_2$  and hexane to afford the analytically pure product as yellow needle-like crystals (0.31 g, 80%).  $^1\text{H}$  NMR (400 MHz;  $\text{CDCl}_3$ )  $\delta$  = 8.01–7.96 (m, 2H,  $>\text{N}-\text{CH}=\text{C}$ ), 7.52–7.29 (m, 15H, Ar).  $^{13}\text{C}\{^1\text{H}\}$  NMR (101 MHz;  $\text{CDCl}_3$ ):  $\delta$  = 154.0, 144.0, 136.1, 129.3, 129.1, 127.2, 126.5, 125.3, 124.1, 108.6.  $^{11}\text{B}\{^1\text{H}\}$  NMR (128 MHz;  $\text{CDCl}_3$ ):  $\delta$  = 1.57. HRMS (ESI)  $[\text{M}+\text{Na}]^+$ ; Found: 369.1346. Calcd.: 369.1345. Anal. Calcd. for  $\text{C}_{21}\text{H}_{17}\text{BF}_2\text{N}_2$ : C, 72.86; H, 4.95; N, 8.09. Found: C, 72.88; H, 4.91; N, 8.11.

### Synthesis of DAI-Tol:

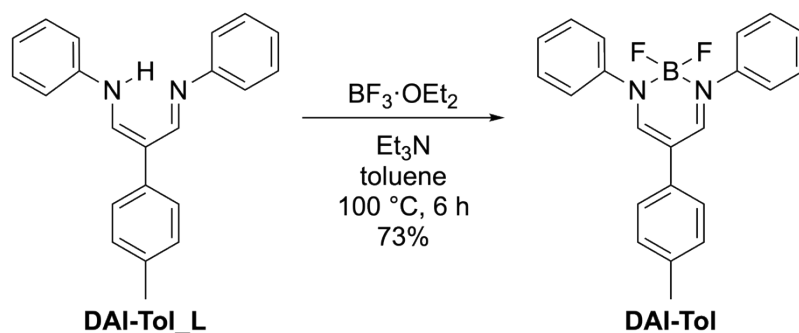

**DAI-Tol\_L** (0.50 g, 1.6 mmol), triethylamine (0.26 mL, 1.9 mmol) and  $\text{BF}_3 \cdot \text{OEt}_2$  (0.71 mL, 5.6 mmol) were used. The crude product was dissolved in a small amount of  $\text{CH}_2\text{Cl}_2$  and the solution was poured into excess MeOH, aged for 30 min at  $-78^\circ\text{C}$ , and then the precipitate was collected and washed with cold MeOH. The resulting yellow powder was purified repeatedly by recrystallization from the mixed solvent of  $\text{CH}_2\text{Cl}_2$  and hexane to afford the analytically pure product as a yellow needle-like crystal (0.42 g, 73%).  $^1\text{H}$  NMR (400 MHz;  $\text{CDCl}_3$ )  $\delta$  = 7.98–7.93 (m, 2H,  $>\text{N}-\text{CH}=\text{C}$ ), 7.50 (d,  $J$  = 7.9 Hz, 4H, Ar), 7.42 (t,  $J$  = 7.8 Hz, 4H, Ar), 7.33 (t,  $J$  = 7.3 Hz, 2H, Ar), 7.21 (t,  $J$  = 9.6 Hz, 4H, Ar), 2.37 (s, 3H,  $\text{CH}_3$ ).  $^{13}\text{C}\{^1\text{H}\}$  NMR (101 MHz;  $\text{CDCl}_3$ ):  $\delta$  = 153.9, 144.1, 136.3, 133.2, 129.8, 129.3, 127.2, 125.3, 124.1, 108.6, 21.0.  $^{11}\text{B}\{^1\text{H}\}$  NMR (128 MHz;  $\text{CDCl}_3$ ):  $\delta$  = 1.57. HRMS (ESI)  $[\text{M}+\text{Na}]^+$ ; Found: 383.1501. Calcd.: 383.1502. Anal. Calcd. for  $\text{C}_{22}\text{H}_{19}\text{N}_2\text{BF}_2$ : C, 73.36; H, 5.32; N, 7.78. Found: C, 73.52; H, 5.14; N, 7.70.

### Synthesis of DAI-Bn:

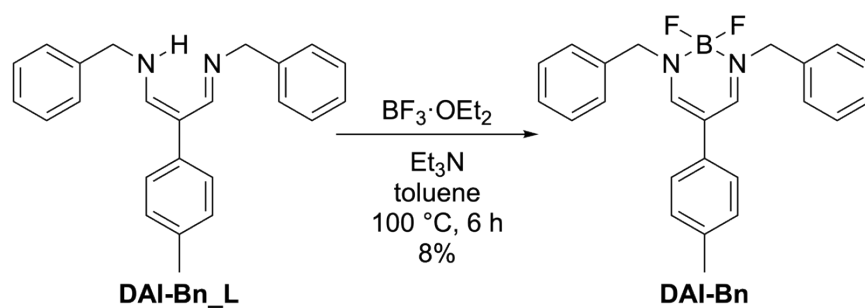

**DAI-Bn\_L** (0.80 g, 2.3 mmol), triethylamine (0.66 mL, 4.7 mmol) and  $\text{BF}_3 \cdot \text{OEt}_2$  (2.9 mL, 23 mmol) were used. The colorless product was purified repeatedly by recrystallization from methanol and hexane/EtOAc to afford an analytically pure product as colorless crystals (7.3 mg, 8%). The product was

gradually decomposed in solution under ambient condition.  $^1\text{H}$  NMR (400 MHz;  $\text{CDCl}_3$ )  $\delta = 7.53$  (s, 2H,  $>\text{N}-\text{CH}=\text{C}$ ), 7.37–7.29 (m, 9H, Ar), 7.06 (d,  $J = 8.3$  Hz, 2H, Ar), 6.92 (d,  $J = 8.1$  Hz, 2H, Ar), 4.73 (s, 4H,  $\text{CH}_2$ ), 2.28 (s, 3H,  $\text{CH}_3$ ).  $^{13}\text{C}\{^1\text{H}\}$  NMR (101 MHz;  $\text{CDCl}_3$ ):  $\delta = 154.7, 137.5, 135.5, 133.7, 129.6, 128.84, 128.78, 127.9, 125.0, 105.7, 53.5, 20.9$ .  $^{11}\text{B}\{^1\text{H}\}$  NMR (128 MHz;  $\text{CDCl}_3$ ):  $\delta = 1.48$ . HRMS (ESI)  $[\text{M}+\text{Na}]^+$ ; Found: 411.1819. Calcd.: 411.1815. Anal. Calcd. for  $\text{C}_{24}\text{H}_{23}\text{N}_2\text{BF}_2$ : C, 74.24; H, 5.97; N, 7.22. Found: C, 74.12; H, 6.09; N, 7.03.

### Synthesis of DAI-3Ph-I:

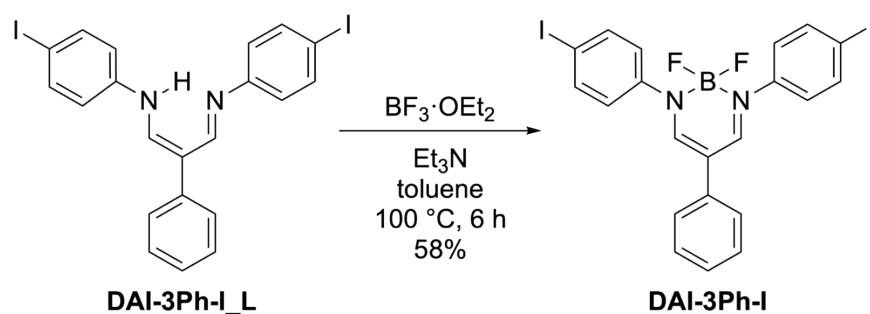

**DAI-3Ph\_L** (0.39 g, 0.71 mmol), triethylamine (0.20 mL, 1.4 mmol) and  $\text{BF}_3 \cdot \text{OEt}_2$  (0.89 mL, 7.1 mmol) were used. The residue was purified by recrystallization repeatedly from the mixed solvent of  $\text{CH}_2\text{Cl}_2$  and hexane to afford the analytically pure product as an orange needle-like crystal (0.25 g, 58% yield).  $^1\text{H}$  NMR (400 MHz;  $\text{CD}_2\text{Cl}_2$ ):  $\delta = 7.98$  (s, 2H,  $>\text{N}-\text{CH}=\text{C}$ ), 7.78 (d,  $J = 8.79$  Hz, 4H, Ar), 7.43–7.35 (m, 4H, Ar), 7.30 (t,  $J = 7.02$  Hz, 1H, Ar), 7.25 (d,  $J = 8.79$  Hz, 4H, Ar).  $^{13}\text{C}\{^1\text{H}\}$  NMR (101 MHz;  $\text{CDCl}_3$ ):  $\delta = 153.83, 143.51, 138.41, 135.58, 129.25, 126.84, 125.85, 125.49, 109.38, 92.34$ .  $^{11}\text{B}\{^1\text{H}\}$  NMR ( $\text{CDCl}_3$ ):  $\delta = 1.18$  (t,  $J = 24.96$  Hz). HRMS (ESI)  $[\text{M}+\text{Na}]^+$ ; Found: 620.9270. Calcd.: 620.9278.

### Synthesis of DAI-2Ph:

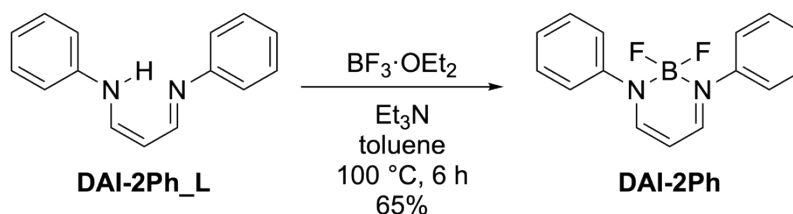

**DAI-2Ph\_L** (0.90 g, 4.0 mmol), triethylamine (1.1 mL, 8.1 mmol) and  $\text{BF}_3 \cdot \text{OEt}_2$  (5.1 mL, 40 mmol) were used. The brown oil was purified by a silica gel column chromatography with  $\text{CHCl}_3/\text{hexane}$  (3/1,  $v/v$ ,  $R_f = 0.25$ ) as an eluent. The obtained yellow oil was dissolved in  $\text{CH}_3\text{CN}$  (*ca.* 5 mL) and poured into excess water (*ca.* 50 mL). Yellow precipitate appeared and was collected with suction filtration. The product was purified by recrystallization from hexane/toluene to afford the analytically pure product as a colorless crystal (0.71 g, 65%).  $^1\text{H}$  NMR (400 MHz;  $\text{CDCl}_3$ )  $\delta = 7.66$  (s, 2H,  $>\text{N}-\text{CH}=\text{C}$ ), 7.46–7.38 (m, 8H, Ar), 7.33–7.28 (m, 2H, Ar), 5.49 (t,  $J = 6.0$  Hz, 1H,  $-\text{CH}=\text{CH}-\text{CH}=\text{}$ ).  $^{13}\text{C}\{^1\text{H}\}$  NMR (101 MHz;  $\text{CDCl}_3$ ):  $\delta = 154.6, 144.0, 129.2, 127.0, 124.0, 93.1$ . HRMS (ESI)  $[\text{M}+\text{Na}]^+$ ; Found: 293.1033. Calcd.: 293.1032. Anal. Calcd. for  $\text{C}_{15}\text{H}_{13}\text{BF}_2\text{N}_2$ : C, 66.71; H, 4.85; N, 10.37. Found: C, 66.69; H, 4.83; N, 10.29.

### General procedure for the synthesis of polymers

To a two-neck round-bottomed flask equipped with **DAI-3Ph-I**, a boronic acid derivative,  $\text{Pd}_2(\text{dba})_3$ , SPhos and cesium carbonate were added toluene and water. The mixture was stirred at 80 °C for 24 h under nitrogen atmosphere. The resulted solution was diluted with a small amount of toluene and poured into an excess amount of methanol to collect the polymer by suction filtration. The precipitate was dissolved in a small amount of  $\text{CHCl}_3$ , and then the product was reprecipitated in ethanol. The polymer collected by filtration was dried in vacuum to give a corresponding polymer.

### Synthesis of PDAI-Ph

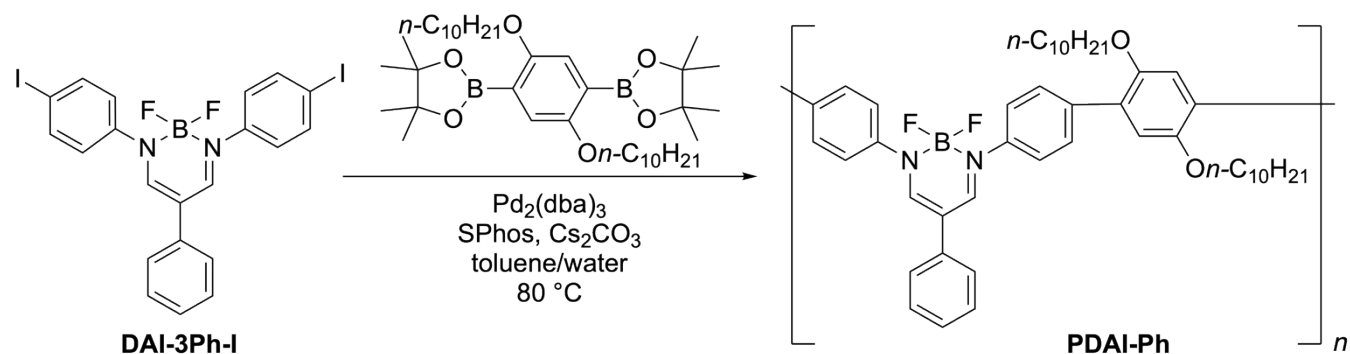

**DAI-3Ph-I** (0.25 g, 0.42 mmol), 2,5-didecyloxyphenylene-1,4-bis(4,4,5,5-tetramethyl-1,3,2-dioxaborolane) (0.27 g, 0.42 mmol), Pd<sub>2</sub>(dba)<sub>3</sub> (3.8 mg, 4.2 μmol), SPhos (6.9 mg, 17 μmol) and cesium carbonate (1.4 g, 42 mmol) were added toluene (6.0 mL) and water (6.0 mL) were used. The title compound was obtained as a yellow solid (0.30 g, 98%). SEC (CHCl<sub>3</sub>, polystyrene standard):  $M_n = 16,000$ ;  $M_w = 39,000$ ;  $D = 2.4$ . <sup>1</sup>H NMR (400 MHz; CDCl<sub>3</sub>): δ = 8.08 (s, 2H, >N-CH=C), 7.70 (d,  $J = 8.24$  Hz, 4H, Ar), 7.59 (d,  $J = 8.24$  Hz, 4H, Ar), 7.43–7.41 (m, 4H, Ar), 7.33–7.30 (m, 1H, Ar), 7.02 (s, 2H, Ar), 3.96 (t,  $J = 6.78$  Hz, 4H, O-CH<sub>2</sub>), 1.72 (m, 4H, alkyl), 1.39 (m, 4H, alkyl), 1.25 (m, 24H, alkyl), 0.85 (t,  $J = 6.99$  Hz, 6H). <sup>13</sup>C{<sup>1</sup>H} NMR (101 MHz; CDCl<sub>3</sub>): δ = 153.71, 150.30, 142.84, 137.41, 136.25, 130.39, 129.92, 129.18, 126.51, 125.41, 123.52, 116.06, 108.83, 69.64, 31.87, 29.60, 29.59, 29.54, 29.32, 29.29, 26.07, 22.65, 14.08. <sup>11</sup>B{<sup>1</sup>H} NMR (CDCl<sub>3</sub>): δ = 1.47 (t,  $J = 31.36$  Hz).

### Synthesis of PDAI-FL

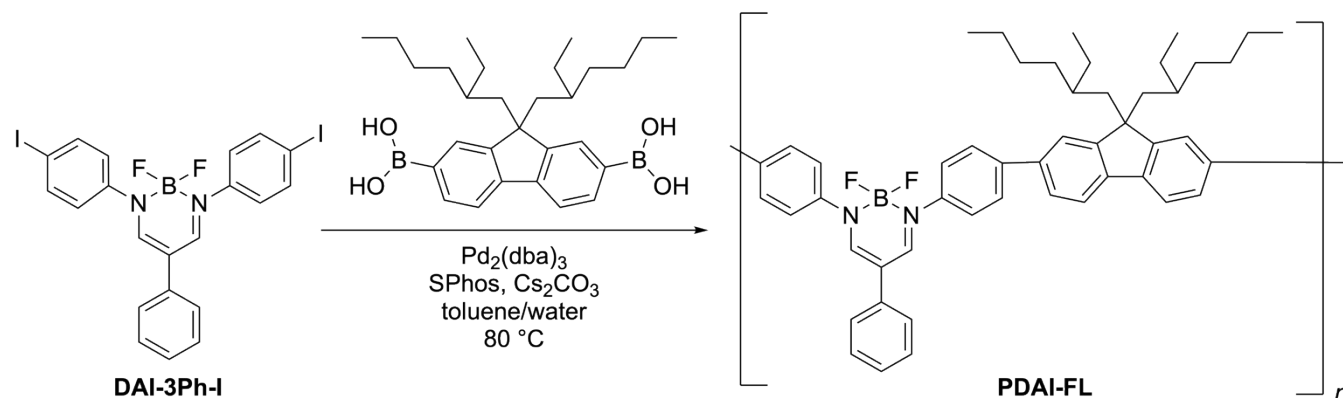

**DAI-3Ph-I** (0.30 g, 0.50 mmol), [9,9-bis(2-ethylhexyl)-9H-fluorene-2,7-diyl]bisboronic acid (0.24 g, 0.50 mmol), Pd<sub>2</sub>(dba)<sub>3</sub> (4.6 mg, 5.0 μmol), SPhos (8.2 mg, 20 μmol) and cesium carbonate (1.6 g, 5.0 mmol) were added toluene (5.0 mL) and water (5.0 mL) were used. The title compound was obtained as a yellow solid (0.28 g, 75%). SEC (CHCl<sub>3</sub>, polystyrene standard):  $M_n = 7,200$ ;  $M_w = 16,000$ ;  $D = 1.9$ . <sup>1</sup>H NMR (400 MHz; CDCl<sub>3</sub>): δ = 8.08 (s, 2H, >N-CH=C), 7.80–7.32 (m, 19H, Ar), 2.09 (m, 4H, alkyl), 0.86–0.54 (m, 30H, alkyl). <sup>13</sup>C{<sup>1</sup>H} NMR (101 MHz; CDCl<sub>3</sub>): δ = 153.65, 151.43, 143.01, 140.86, 140.48, 138.53, 138.39, 136.16, 129.20, 127.93, 126.58, 126.11, 125.43, 124.32, 122.76, 120.08, 55.16, 44.54,

34.74, 33.91, 28.27, 28.24, 27.13, 22.71, 13.96, 10.38, 10.36.  $^{11}\text{B}\{^1\text{H}\}$  NMR ( $\text{CDCl}_3$ ):  $\delta = 1.48$  (t,  $J = 31.36$  Hz).

### Synthesis of PDAI-BT

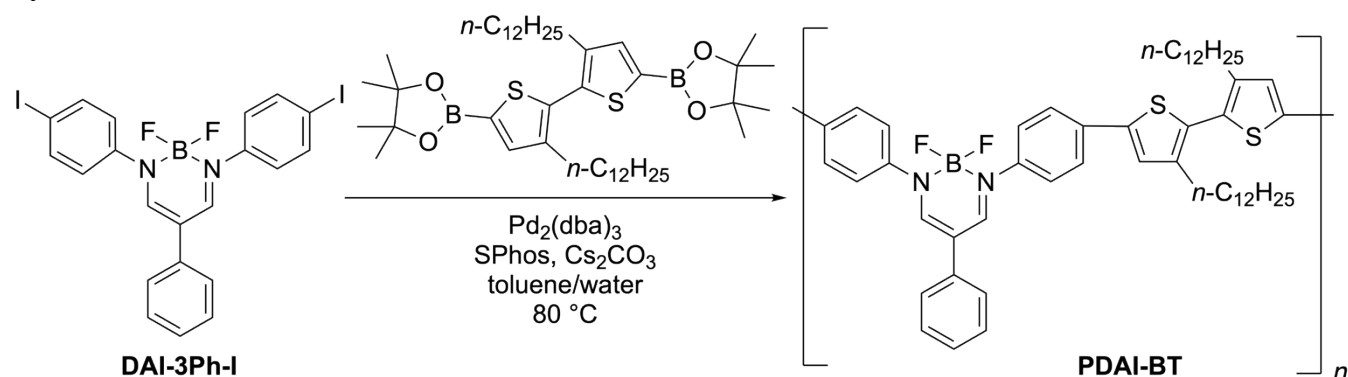

**DAI-3Ph-I** (0.20 g, 0.33 mmol), 4,4'-didodecyl-2,2'- bithiophene-5,5'-diboronic acid bis(pinacol) ester (0.25 g, 0.33 mmol),  $\text{Pd}_2(\text{dba})_3$  (3.1 mg, 3.3  $\mu\text{mol}$ ), SPhos (5.5 mg, 13  $\mu\text{mol}$ ) and cesium carbonate (1.1 g, 3.3 mmol) were added toluene (3.3 mL) and water (3.3 mL) were used. The title compound was obtained as an orange solid (0.28 g, 100%). SEC ( $\text{CHCl}_3$ , polystyrene standard):  $M_n = 14,000$ ;  $M_w = 30,000$ ;  $D = 2.1$ .  $^1\text{H}$  NMR (400 MHz;  $\text{CDCl}_3$ ):  $\delta = 8.01$  (s, 2H,  $>\text{N}-\text{CH}=\text{C}$ ), 7.67 (d,  $J = 8.36$  Hz, 4H, Ar), 7.54 (d,  $J = 8.36$  Hz, 4H, Ar), 7.45–7.38 (m, 4H, Ar), 7.34–7.32 (m, 1H, Ar), 7.23 (s, 2H, Ar), 2.59 (t,  $J = 7.48$  Hz, 4H, alkyl), 1.63 (m, 4H, alkyl), 1.25 (m, 36H, alkyl), 0.87 (t,  $J = 6.90$  Hz, 6H).  $^{13}\text{C}\{^1\text{H}\}$  NMR (101 MHz;  $\text{CDCl}_3$ ):  $\delta = 153.33, 143.72, 143.08, 142.65, 136.03, 133.35, 129.20, 128.63, 126.64, 126.37, 125.48, 125.19, 124.32, 109.15, 31.90, 30.72, 29.68, 9.64, 29.59, 29.47, 29.34, 29.15, 22.67, 14.09$ .  $^{11}\text{B}\{^1\text{H}\}$  NMR ( $\text{CDCl}_3$ ):  $\delta = 1.47$  (t,  $J = 30.72$  Hz).



## Photocyclization of DKI-4Ph

To reveal the existence of a photocyclization path for DKI complexes, we subjected **DKI-4Ph** to a photochemical cyclization condition for 5 h (Scheme S1). As a result, a trace amount of a doubly cyclized compound was detected in the crude mixture by high-resolution mass spectrometry with APCI. Aerial oxidation would occur in this photocyclization process. Therefore, it was experimentally demonstrated that the photocyclization process should be one of actual decay paths of photoexcited DKI complexes. Unfortunately, further purification and isolation of the cyclized compound has not been accomplished probably due to its instability.

**Scheme S1.** Photochemical cyclization of **DKI-4Ph**

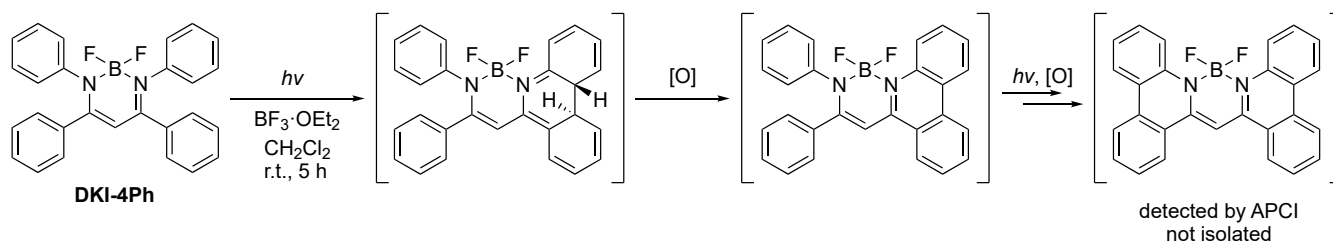

**Condition:** To a 1000-mL photochemical reaction vessel equipped with a stirrer bar, **DKI-4Ph** (0.10 g, 0.24 mmol) and dry  $\text{CH}_2\text{Cl}_2$  (200 mL) was added  $\text{BF}_3 \cdot \text{OEt}_2$  (5.8 mL, 47 mmol). The reaction mixture was irradiated with a high-pressure mercury UV lamp (Sen Lights Corp., HL400BH-8) for 5 h. After concentration with a rotary evaporator, the residue was redissolved in  $\text{CH}_2\text{Cl}_2$  and washed with saturated  $\text{NaHCO}_3$  aq. The organic layer was dried over  $\text{MgSO}_4$ , followed by filtration. After concentration, the crude product was analyzed with HRMS. Further purification and isolation of the product have not been accomplished probably due to its instability. HRMS (APCI)  $[\text{M}+\text{H}]^+$ ; Found: 419.1523. Calcd.: 419.1526.

## SEC Profile

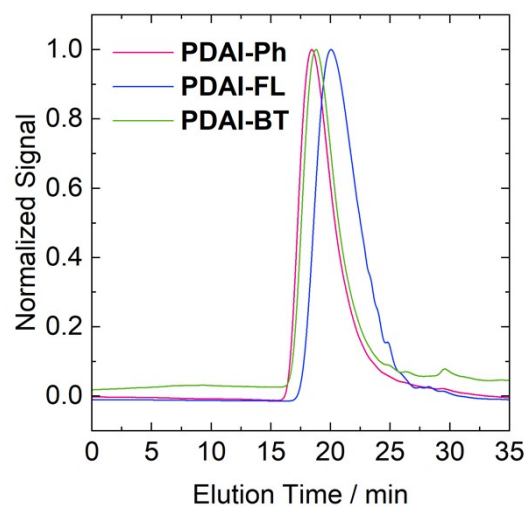

**Figure S1.** Chromatogram of the synthesized polymers.  $\text{CHCl}_3$  was used as an eluent.

# Photophysical Properties

## Photoluminescence lifetime

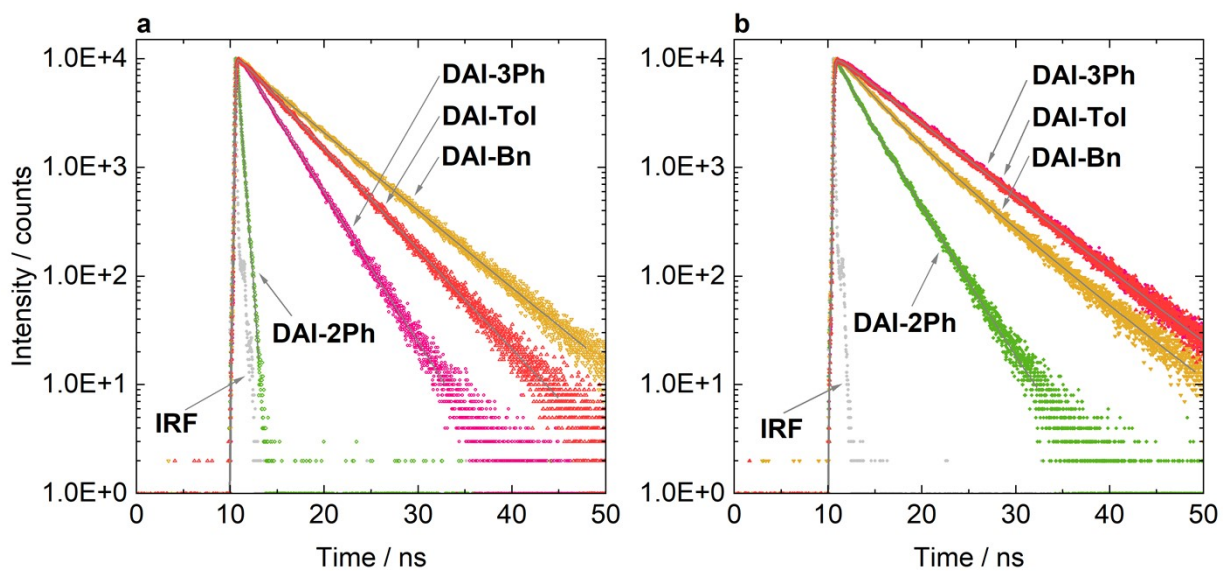

**Figure S2.** Fluorescence decay curves of DAI complexes in (a) solution and (b) crystalline states. Color symbols and gray solid lines are experimental and fitted data, respectively. IRF denotes the instrument response function.

### Photophysical properties of DAI complexes in various solvents

UV-vis absorption and photoluminescence spectra of DAI complexes were measured in  $\text{CHCl}_3$ , toluene, and DMSO. For all solutions, the concentration was  $1.0 \times 10^{-5}$  M (Figure S3). The results indicated that the photophysical properties of these complexes did not significantly depend on solvents.

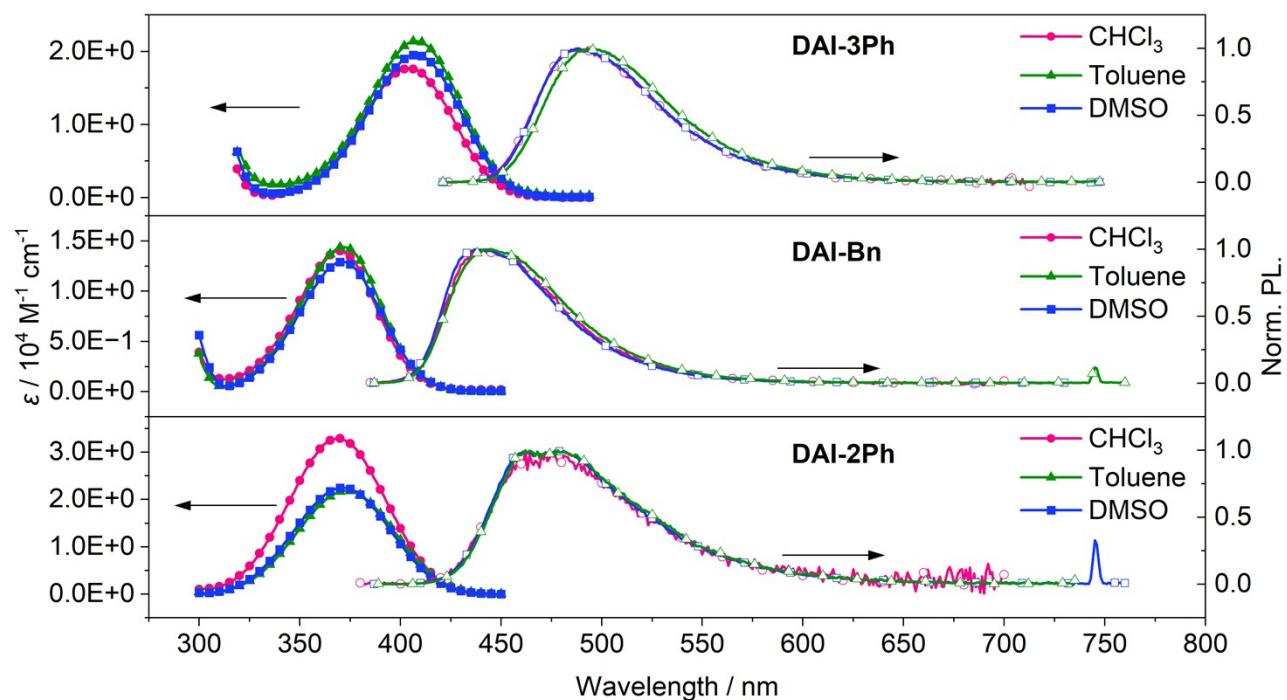

**Figure S3.** UV-vis absorption and photoluminescence spectra of DAI complexes in  $\text{CHCl}_3$ , toluene, and DMSO.

## Photophysical properties of DAI complexes in various molecular environments

Crystal samples were prepared by recrystallization from DCM/hexane mixed solutions. Amorphous samples were prepared by the following melt-quenching method except for **DKI-5Ph**: A crystalline powder placed on a quartz substrate was heated on a hot plate until the sample melted entirely, and then it was immediately taken into a freezer ( $-20\text{ }^{\circ}\text{C}$ ) to give an amorphous solid. For **DKI-5Ph**, which shows remarkably high crystallinity, the crystalline powder was melted on a single-crystal silicon substrate, and then it was immediately taken into room-temperature water in a glass Petri dish to give an amorphous solid. Powder X-ray diffraction data indicated the melt-quenched samples were composed of an amorphous phase (Figure S4).

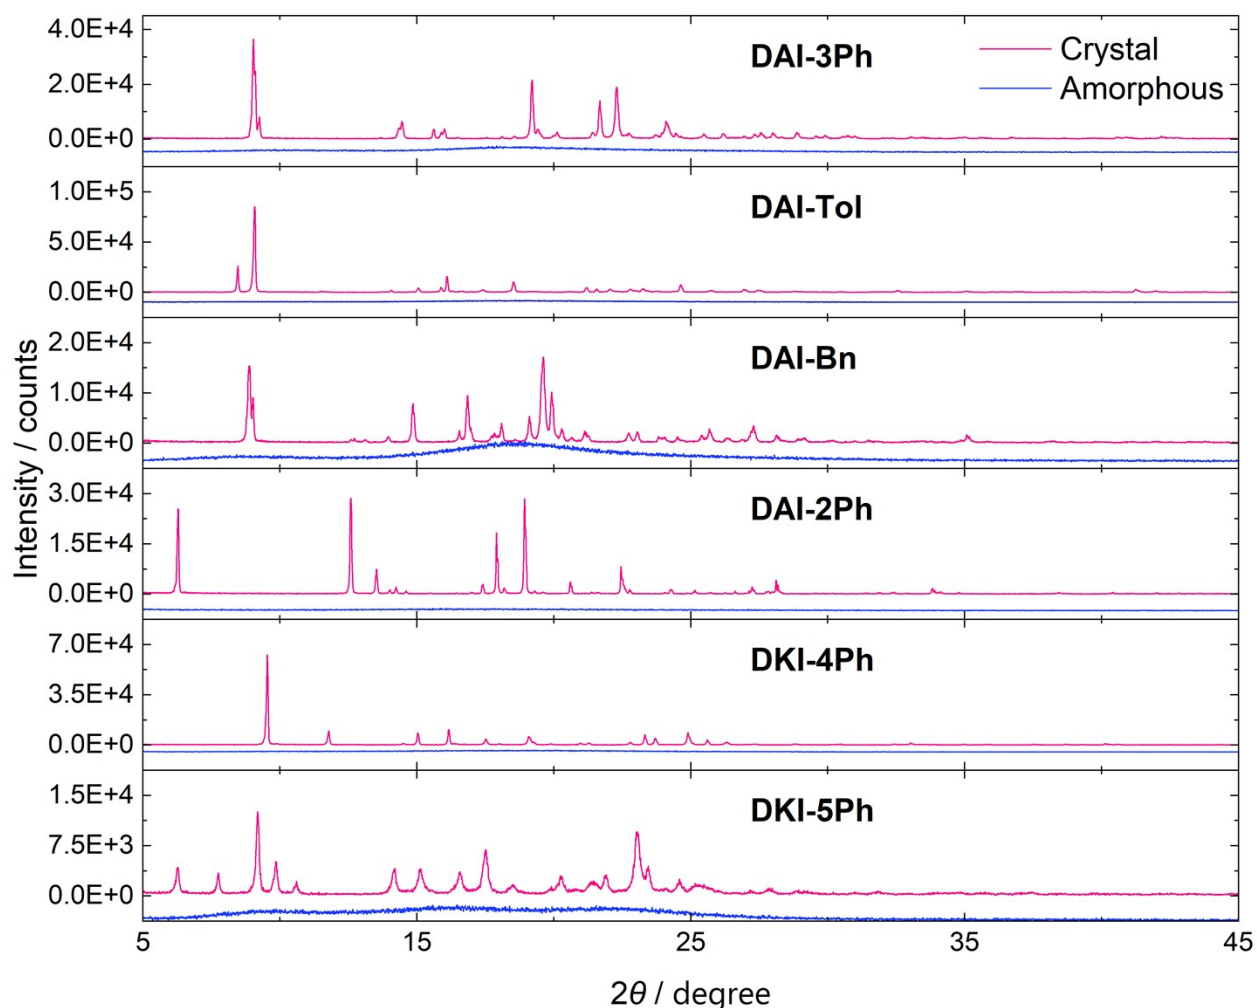

**Figure S4.** Powder X-ray diffraction profiles of the crystalline powder (magenta) and the amorphous solid (blue) of the synthesized complexes.

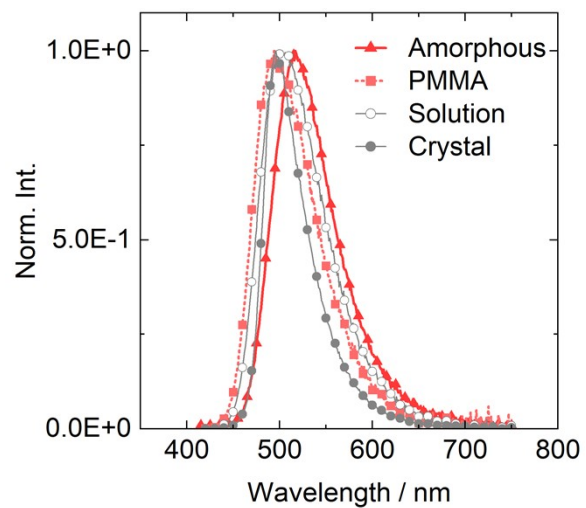

**Figure S5.** Normalized photoluminescence spectra of **DAI-Tol** in amorphous, PMMA, solution, and crystalline states.

## Films of DAI polymers with different thickness

Thin films of DAI polymers were fabricated on a quartz substrate ( $1 \times 1 \text{ cm}^2$ ). The surface of quartz substrates was modified with octadecyltrimethoxysilane by the following procedure: A pristine quartz substrate was treated with piranha solution ( $\text{H}_2\text{SO}_4/\text{H}_2\text{O}_2 = 3/1$ , v/v) at  $80 \text{ }^\circ\text{C}$  for 2 h and rinsed with deionized water. It was washed by ultrasonication in deionized water, acetone, and isopropanol for 10 min each. Then, the substrate was subjected to the hot vapor of isopropanol for 3 min in a beaker on a hot plate ( $180 \text{ }^\circ\text{C}$ ). The pre-cleaned substrate was treated with UV/ $\text{O}_3$  for 30 min in a UV/ $\text{O}_3$  cleaner (Filgen UV253E). The substrate was immersed into a solution of octadecyltrimethoxysilane (0.01 M in deoxygenated toluene) for 16 h at room temperature. It was washed by ultrasonication in toluene, acetone, and isopropanol for 10 min each. Polymer films were fabricated onto the modified quartz substrates by the spin-coat method (1000 rpm, 30 sec) with  $20 \text{ } \mu\text{L cm}^{-1}$  of polymer solutions. Concentration of polymer solutions was varied from 0.5, 1, 5, 10, 20  $\text{mg mL}^{-1}$  for controlling film thickness. The as-cast films were dried under a vacuum for several hours. Film thickness was measured with a Bruker DektakXT profilometer.

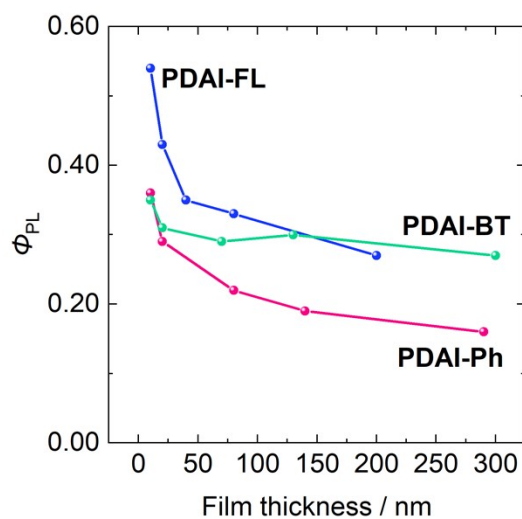

**Figure S6.** Photoluminescence quantum yields of the films of DAI polymers with different thickness.

## Molecular weight dependence on photophysical properties of PDAI-Ph

Pristine **PDAI-Ph** was fractionated into four fractions with high-performance liquid chromatography using  $\text{CHCl}_3$  as an eluent. All samples were reprecipitated into MeOH and collected by suction filtration.  $M_n$  of each fraction was determined with SEC as 45, 27, 15, and 10 kDa (Figure S5 and Table S1). UV-vis absorption and photoluminescence spectra of each fraction were recorded (Figure S6).

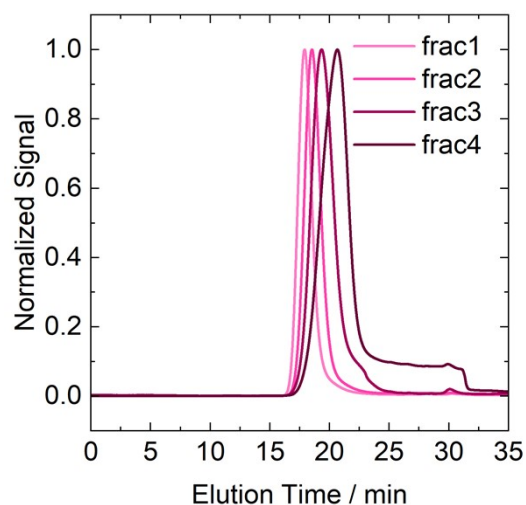

**Figure S7.** Chromatogram of the fractionated **PDAI-Ph**.  $\text{CHCl}_3$  was used as an eluent.

**Table S1.** Properties of fractionated **PDAI-Ph**

| Fraction | $M_n$  | $D$ | $X_n$ |
|----------|--------|-----|-------|
| 1        | 45,000 | 1.4 | 62    |
| 2        | 27,000 | 1.4 | 37    |
| 3        | 15,000 | 1.5 | 21    |
| 4        | 10,000 | 1.4 | 14    |



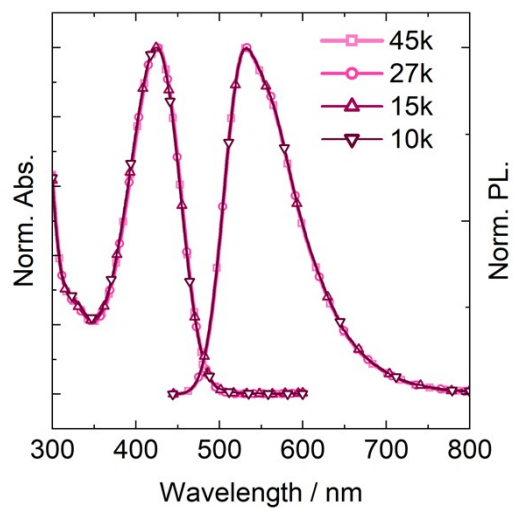

**Figure S8.** Normalized UV-vis absorption and photoluminescence spectra of PDAI-Ph with different molecular weights ( $M_n = 45, 27, 15,$  and  $10$  kDa).

## Lippert–Mataga Plots for DAI Polymers

Absorption and photoluminescence spectra of the DAI polymers were measured in cyclohexane (Cy), toluene (Tol), chloroform, ethyl acetate (AcOEt), dimethyl sulfoxide (DMSO), and methanol (Figure S7). Lippert–Mataga plots were made with the data except for one of **PDAI-Ph** in Cy because of the incomplete solubility of the polymer (Figure S8).

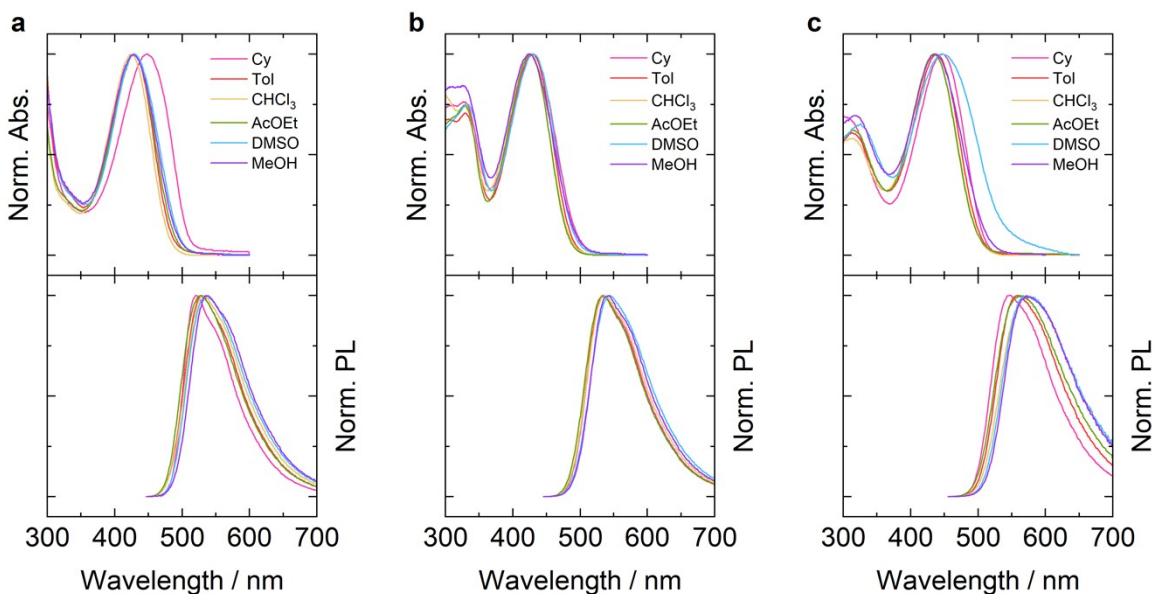

**Figure S9.** Normalized UV–vis and photoluminescence spectra of (a) **PDAI-Ph**, (b) **PDAI-FL**, and (c) **PDAI-BT** in different solutions.

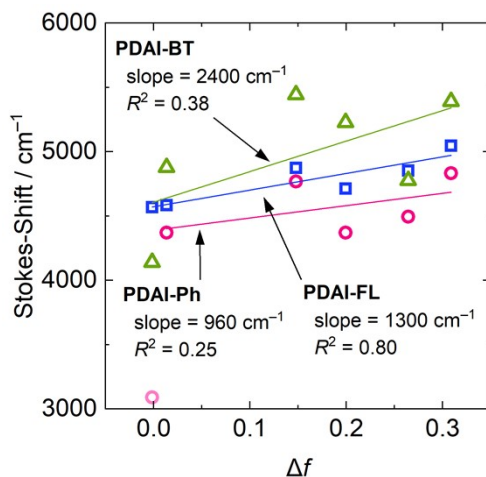

**Figure S10.** Lippert–Mataga plots for **PDAI-Ph** (magenta, circle), **PDAI-FL** (blue, square), and **PDAI-BT** (green, triangle). Open symbols, measured data; solid lines, fitted line. The data of **PDAI-Ph** in cyclohexane (light magenta) was omitted in the fitting due to the incomplete solubility of the polymer.

## Cyclic Voltammetry

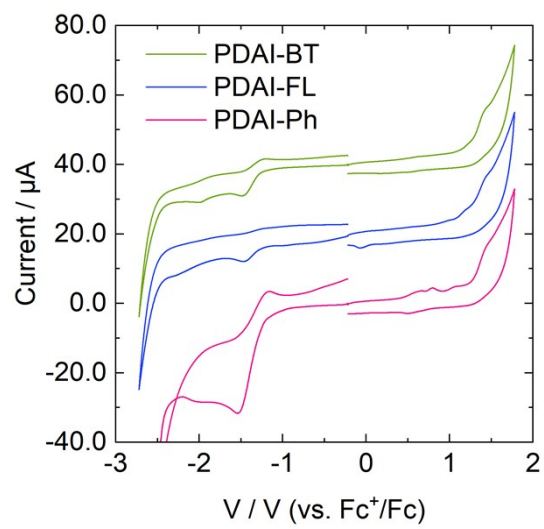

**Figure S11.** Cyclic voltammogram for DAI polymers.

## Theoretical Calculations

Gaussian 16 Rev. C<sup>[3]</sup> was used for density functional theory (DFT) and time-dependent DFT (TD-DFT) calculations. Firstly, geometry optimization was conducted for each compound in ground singlet ( $S_0$ ) and excited singlet ( $S_1$ ) states at the CAM-B3LYP/6-31+G(d,p) level of theory. Optimized structures at  $S_0$  states ( $S_0^{\text{MIN}}$ ) were obtained for all compounds and were confirmed as local minima on each potential energy surface using frequency calculations. It should be noted that these calculations have overestimated the transition energies, especially for **DAI-3Ph** and **DAI-Tol**. This is probably because their HOMO/LUMO overlap is relatively small, leading to small exchange integral, like non-alternant hydrocarbons.<sup>[4]</sup>

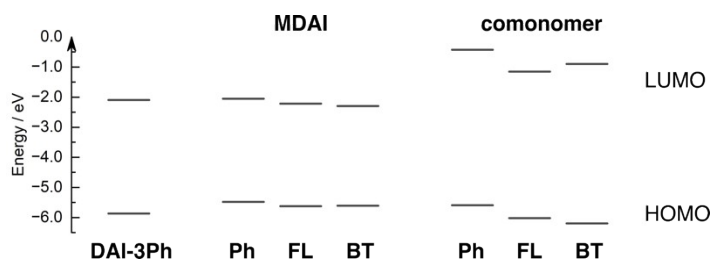

**Figure S12.** HOMO and LUMO energy diagrams for **DAI-3Ph**, **MDAI-Ph**, **MDAI-FL**, **MDAI-BT**, and the corresponding comonomers.

Two-root ( $S_0$  and  $S_1$ ) state-averaged restricted active space self-consistent field (SA2-RASSCF) calculations were performed by the Molpro 2021.2 package.<sup>[5-7]</sup> GaussView 6 and VESTA 3<sup>[8]</sup> were used for visualization of the calculation results.

**Table S2.** Defined active space for SA2-RASSCF calculations<sup>a</sup>

|                | Active space | RAS1 <sup>b</sup> | RAS2 <sup>c</sup> | RAS3 <sup>d</sup> |
|----------------|--------------|-------------------|-------------------|-------------------|
| <b>DAI-2Ph</b> | (12e, 12o)   | 4o                | 4o                | 4o                |
| <b>DAI-3Ph</b> | (16e, 16o)   | 6o                | 4o                | 6o                |
| <b>DKI-4Ph</b> | (26e, 25o)   | 11o               | 4o                | 10o               |

<sup>a</sup>e, o, and h denote electron, orbital, and hole, respectively. <sup>b</sup>One or two excitations (holes) were allowed from RAS1. <sup>c</sup>Any number of electrons was allowed in RAS2. <sup>d</sup>A maximum of two electrons in RAS3 was allowed.

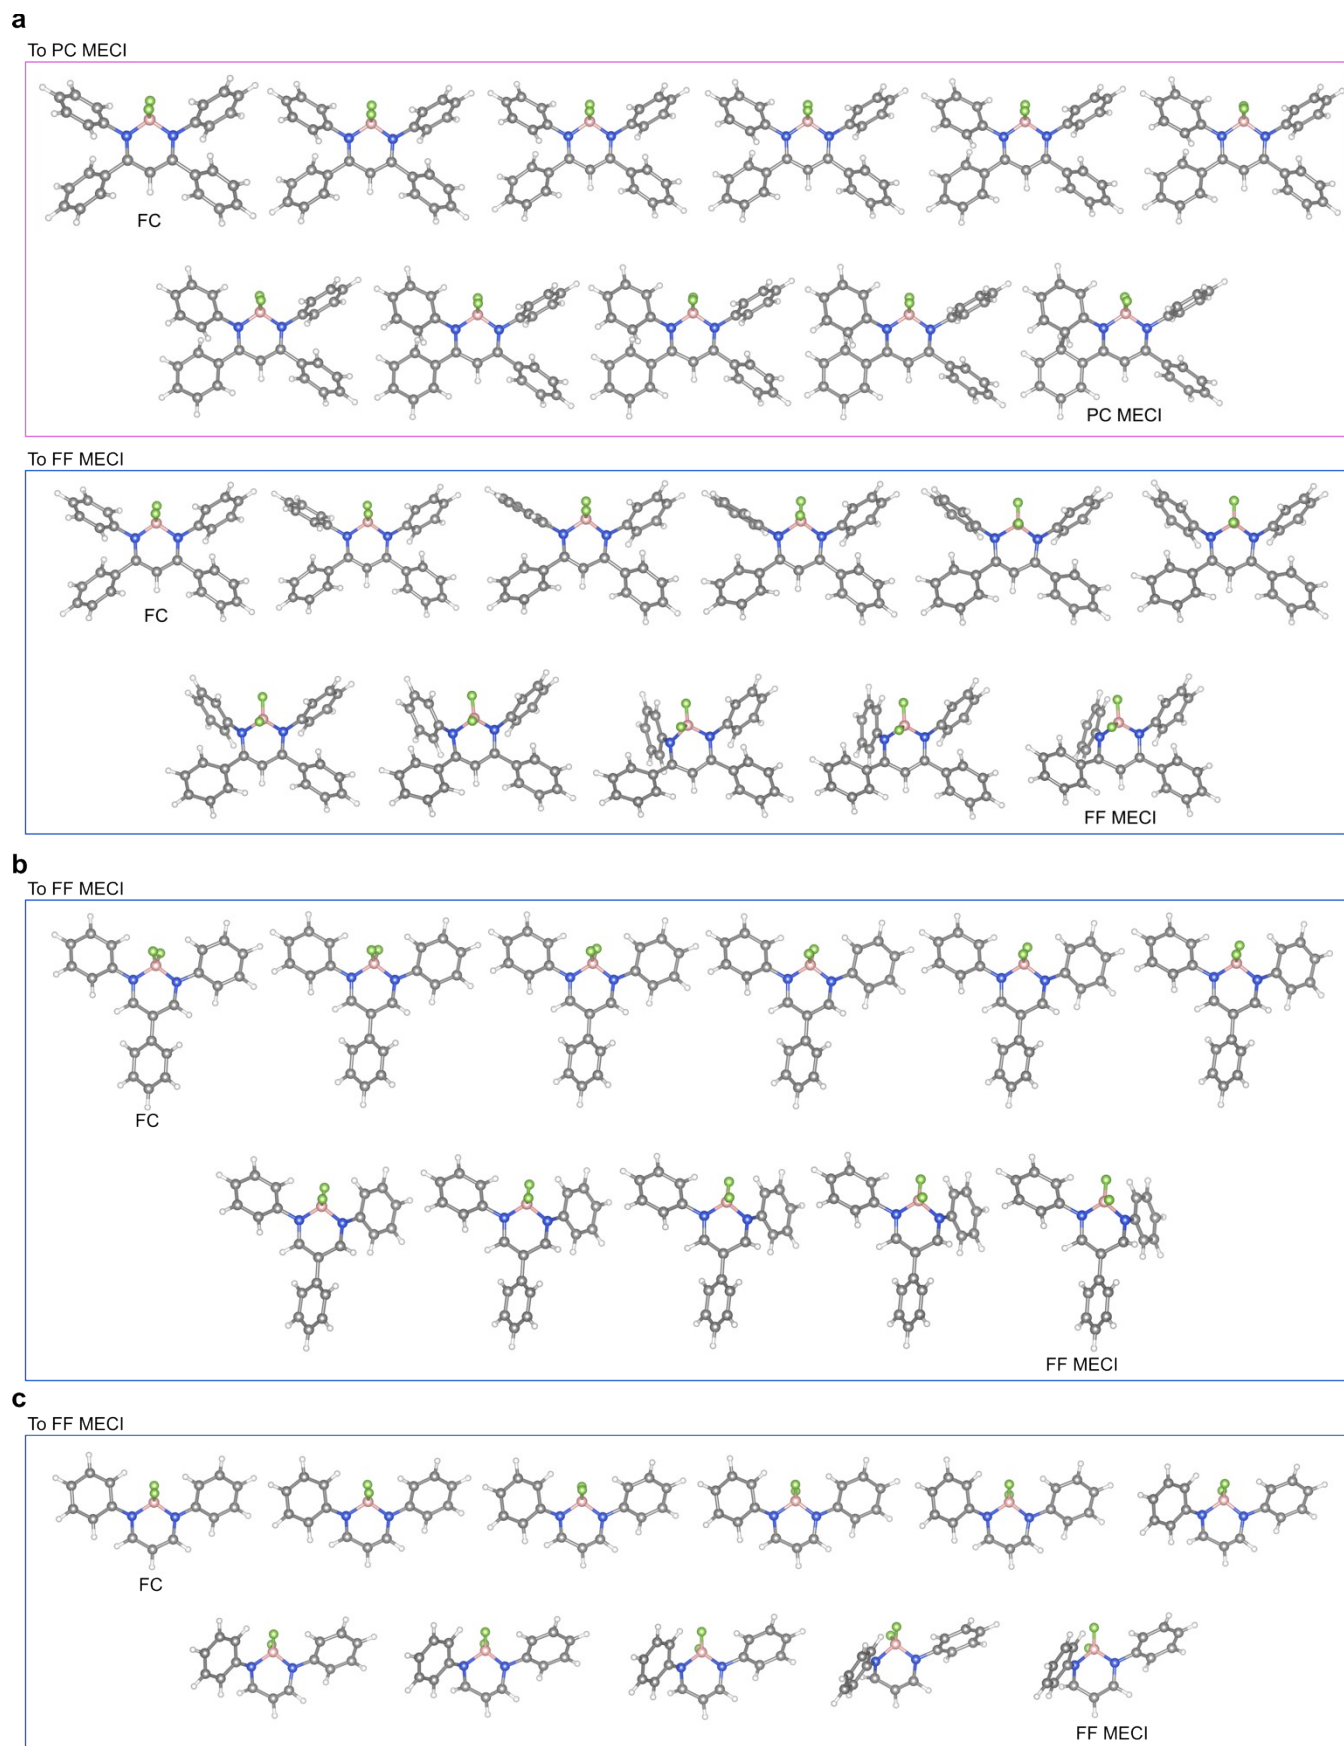

**Figure S13.** LIIC from FC to each MECI for (a) **DKI-4Ph**, (b) **DAI-3Ph**, and (c) **DAI-2Ph**.

# NMR Spectra

a

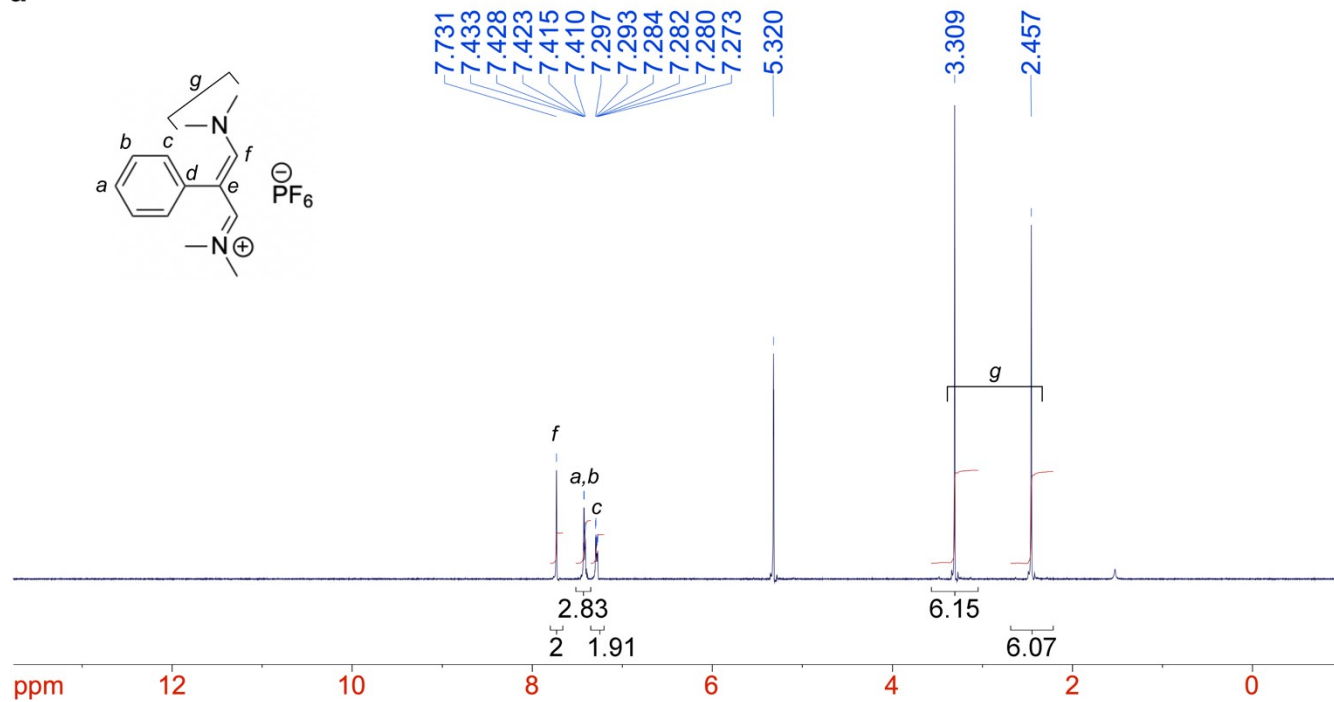

b

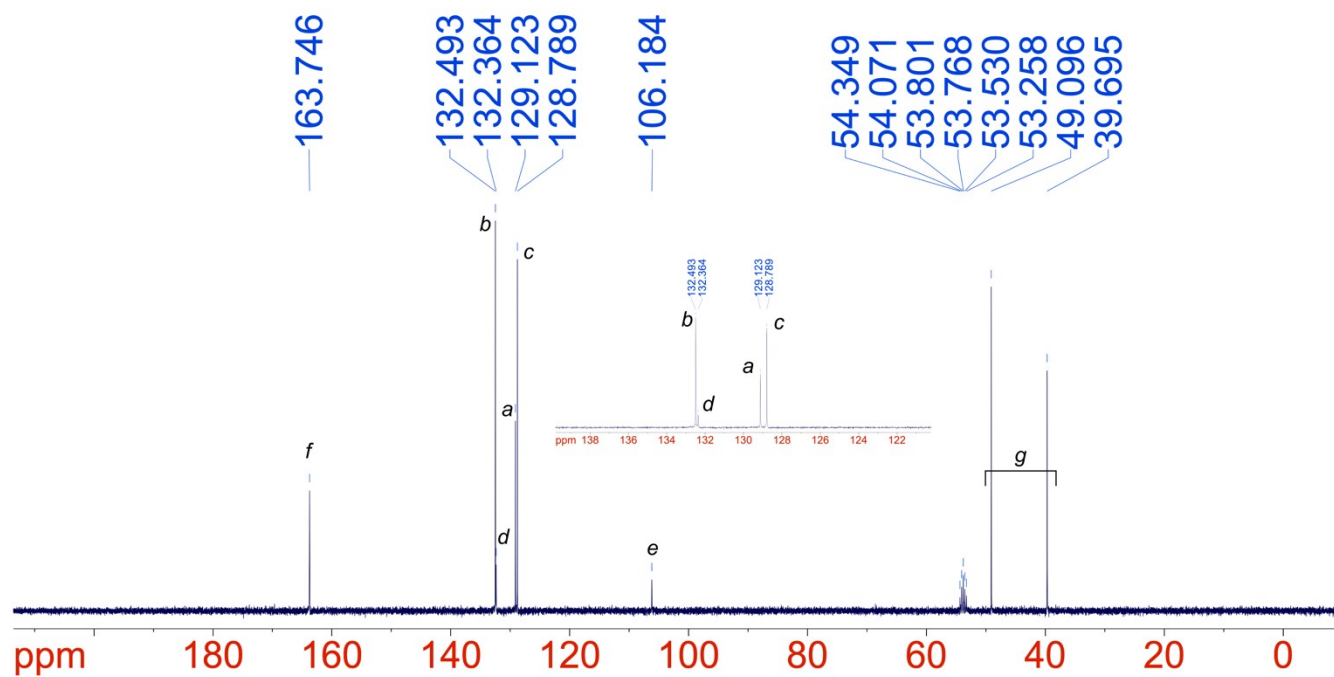

Figure S14. (a) <sup>1</sup>H and (b) <sup>13</sup>C {<sup>1</sup>H} NMR spectra of Vin-Ph in CD<sub>2</sub>Cl<sub>2</sub>.



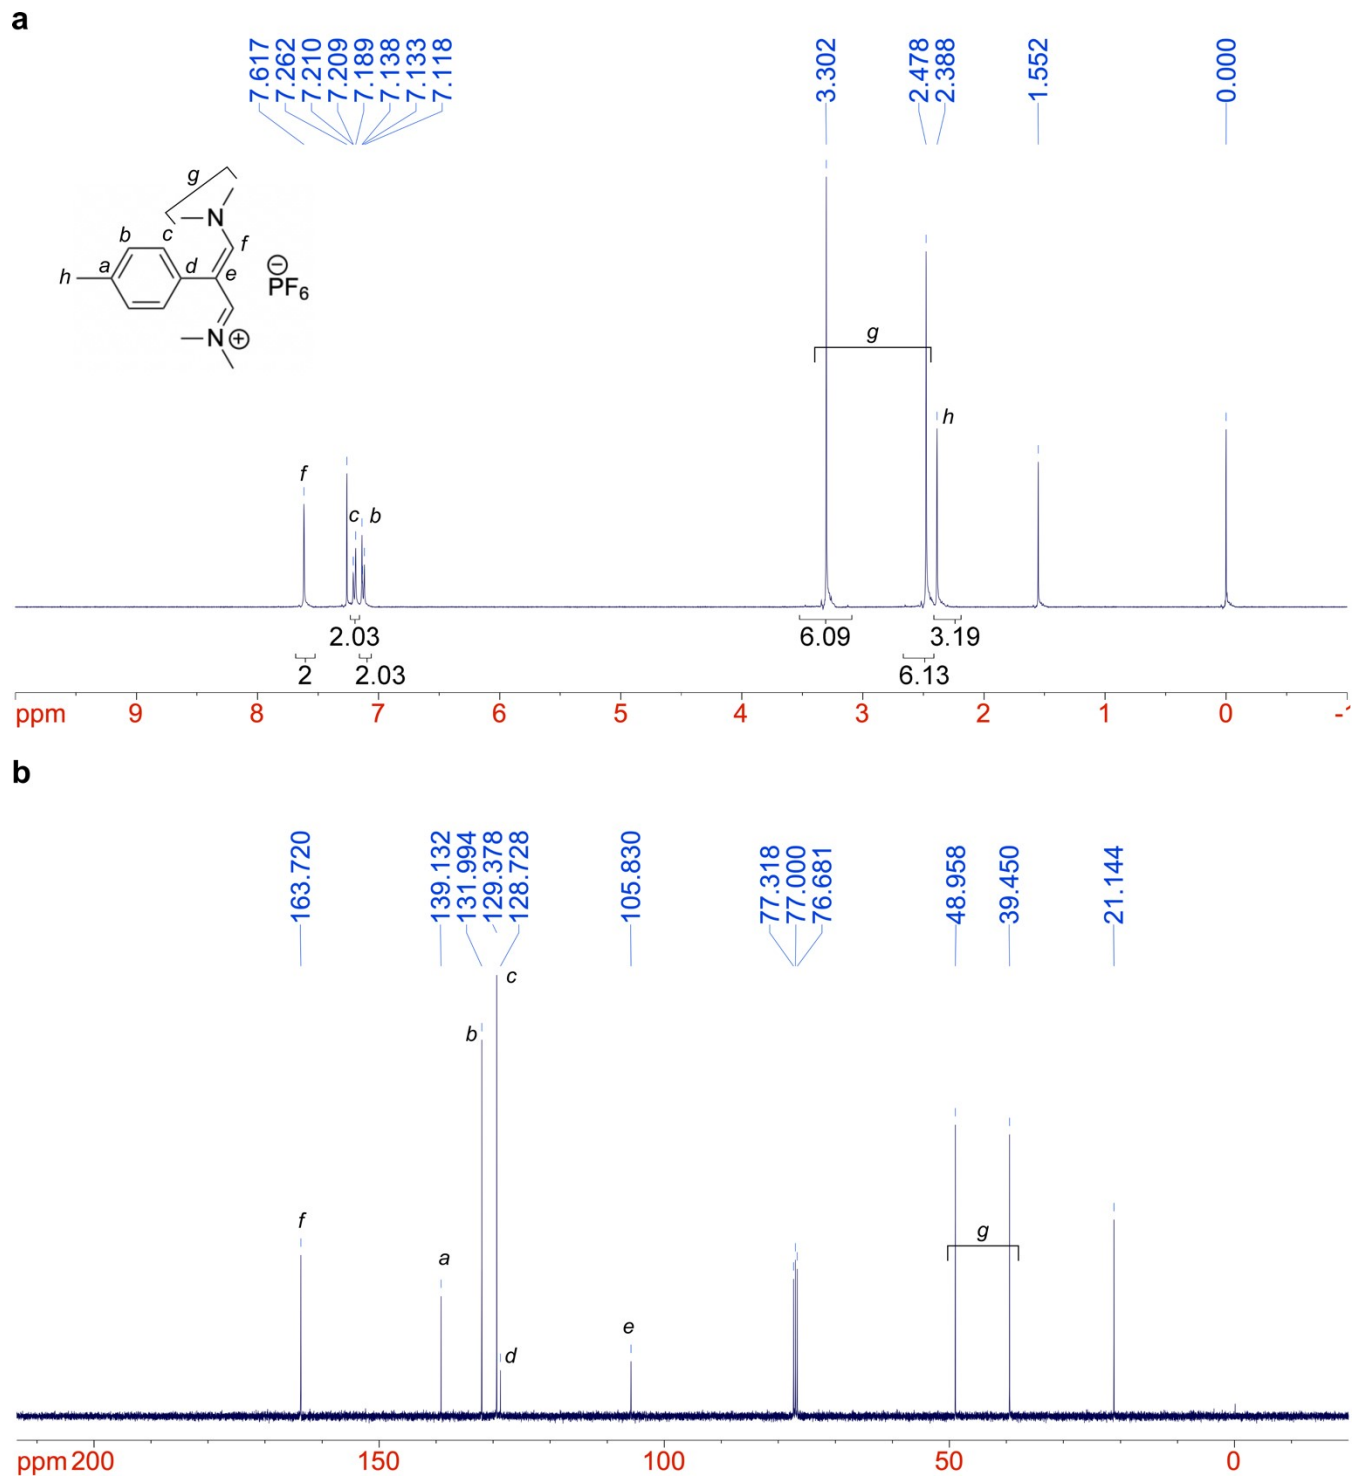

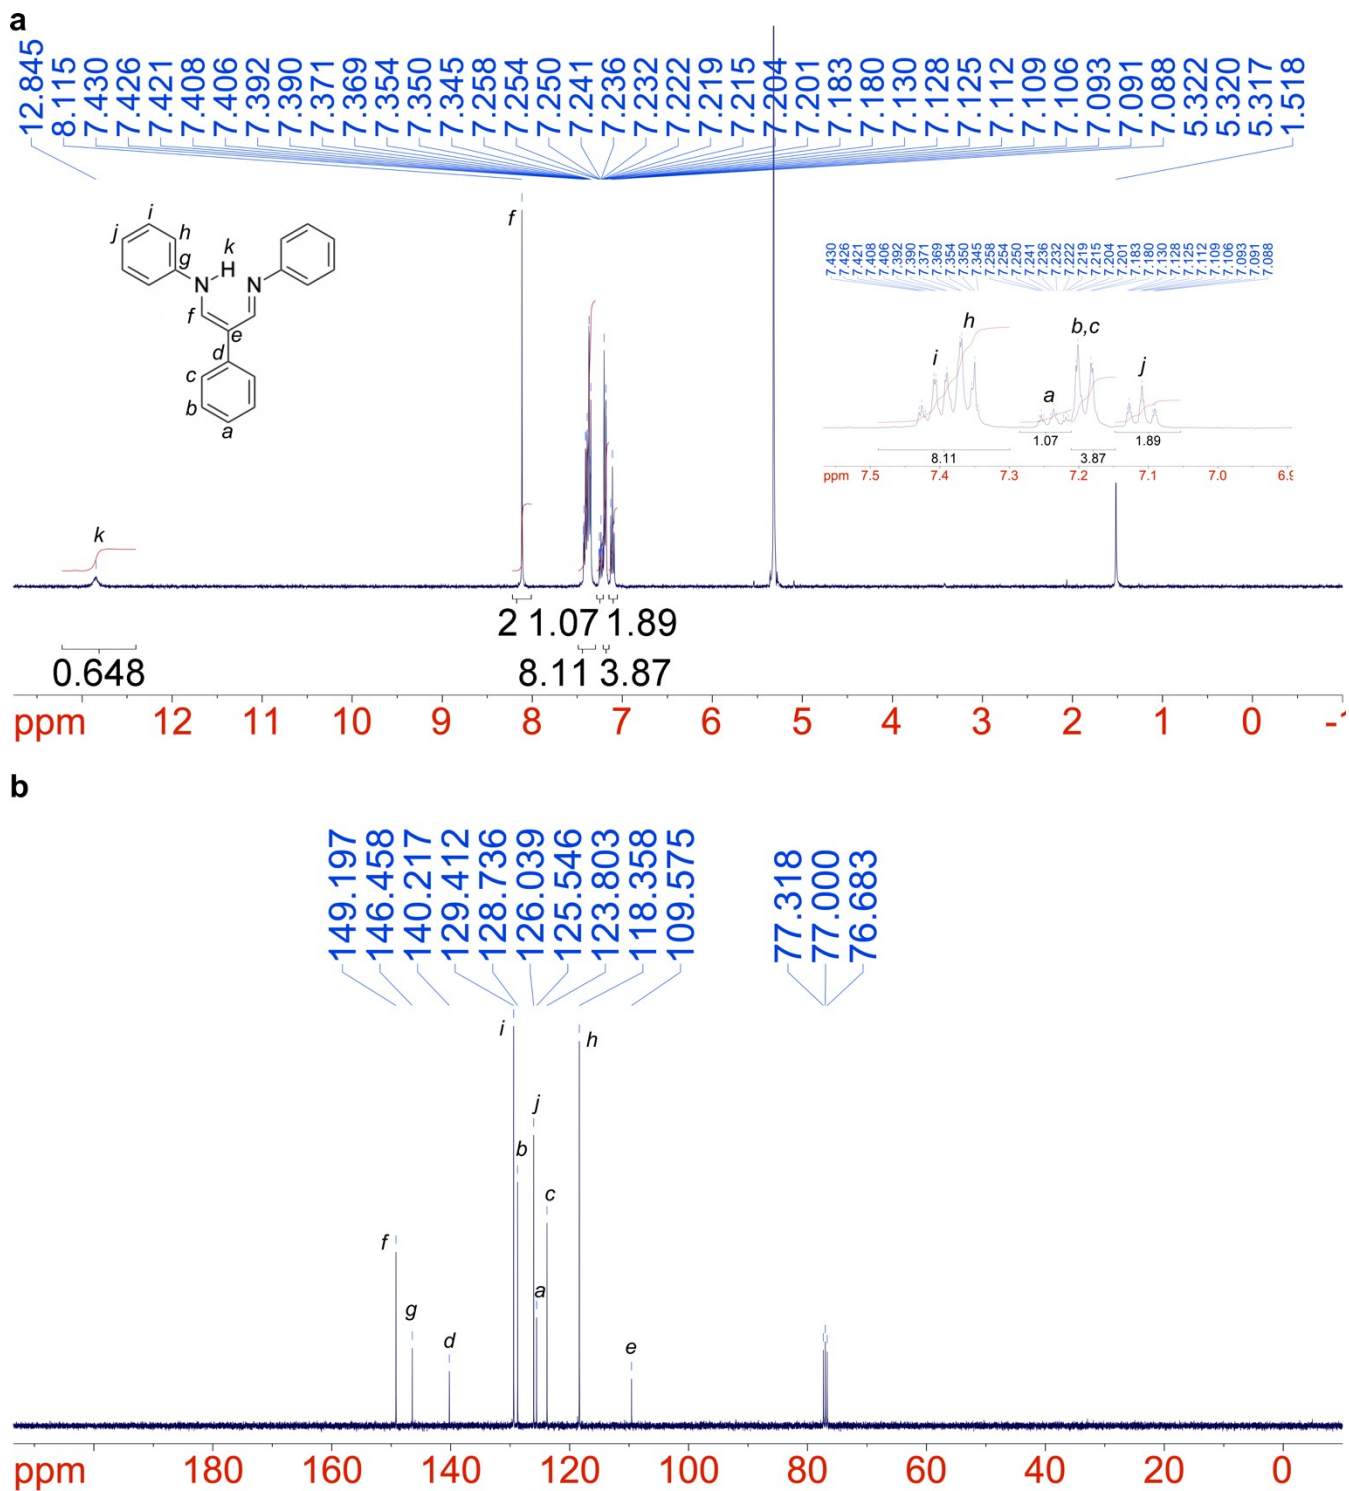

**Figure S16.** (a)  $^1\text{H}$  and (b)  $^{13}\text{C}\{^1\text{H}\}$  NMR spectra of DAI-3Ph\_L in  $\text{CD}_2\text{Cl}_2$  and  $\text{CDCl}_3$ , respectively.

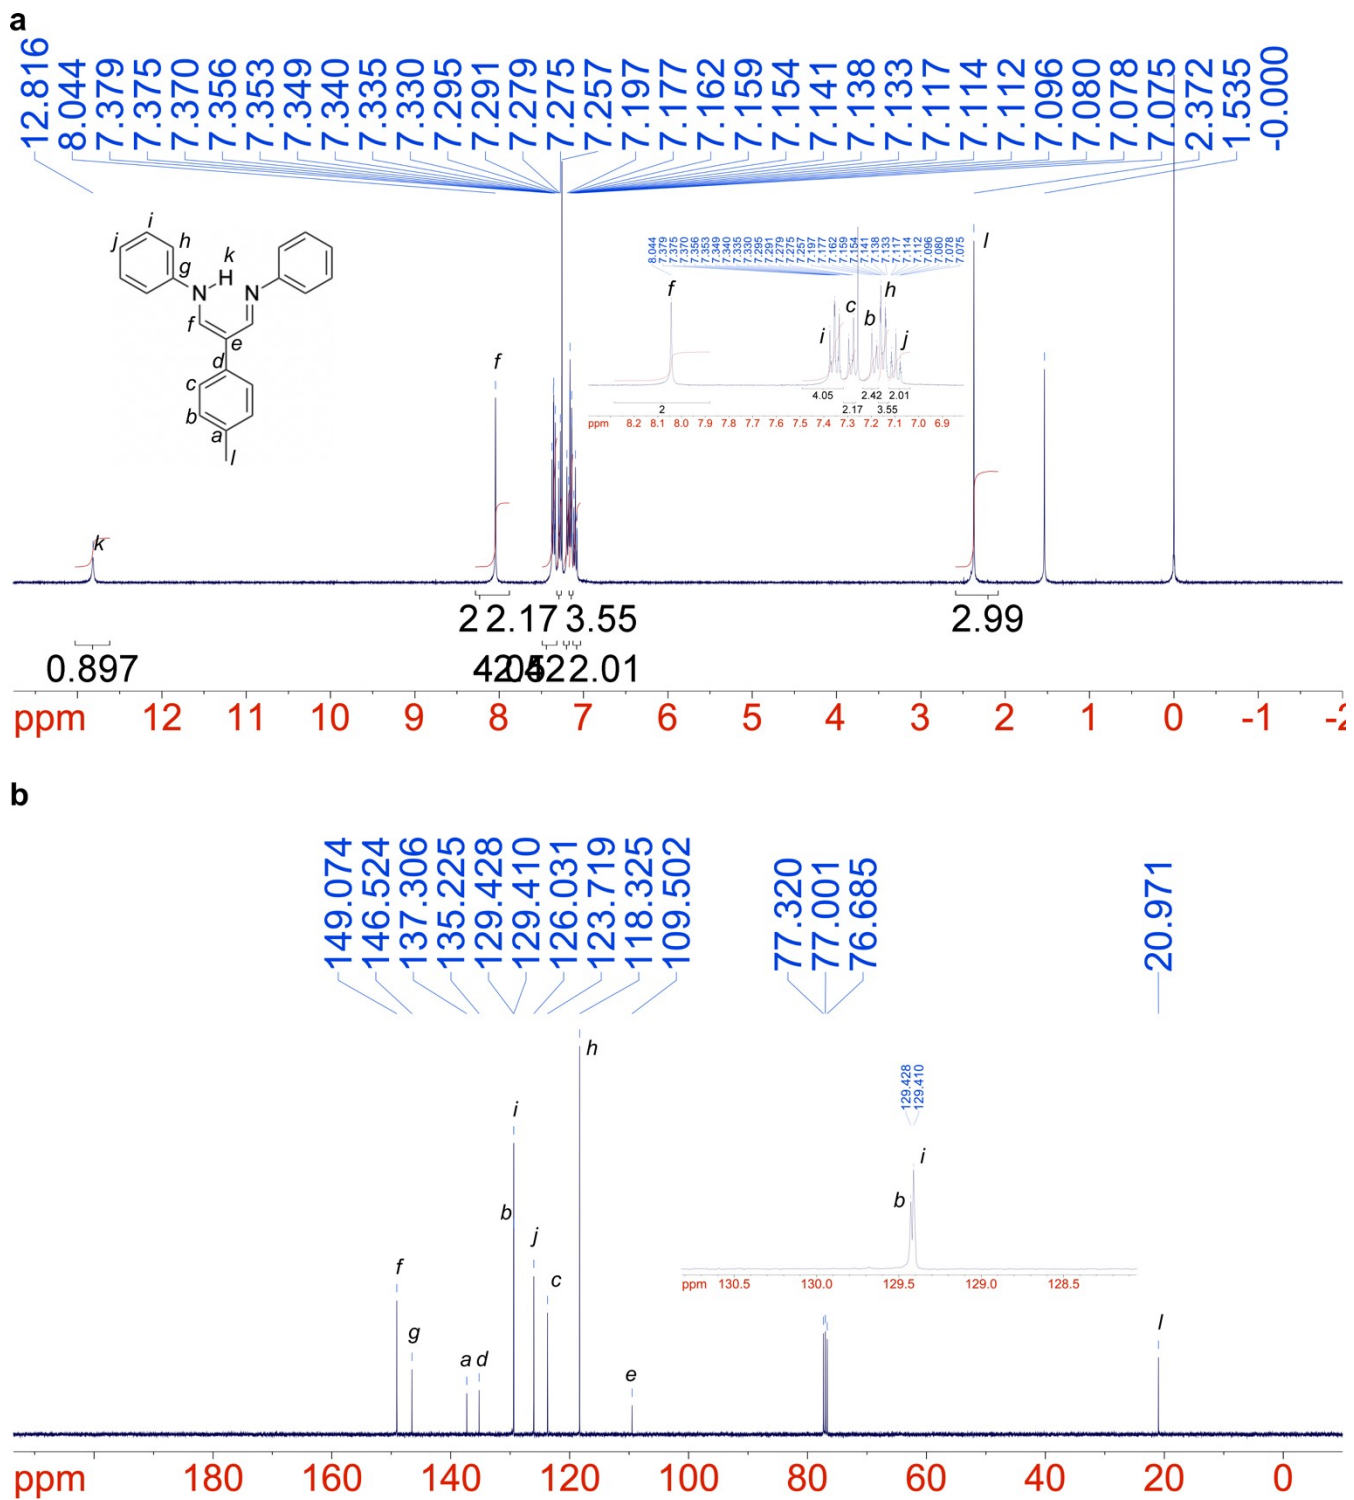

Figure S17. (a)  $^1\text{H}$  and (b)  $^{13}\text{C}\{^1\text{H}\}$  NMR spectra of DAI-Tol\_L in  $\text{CDCl}_3$ .

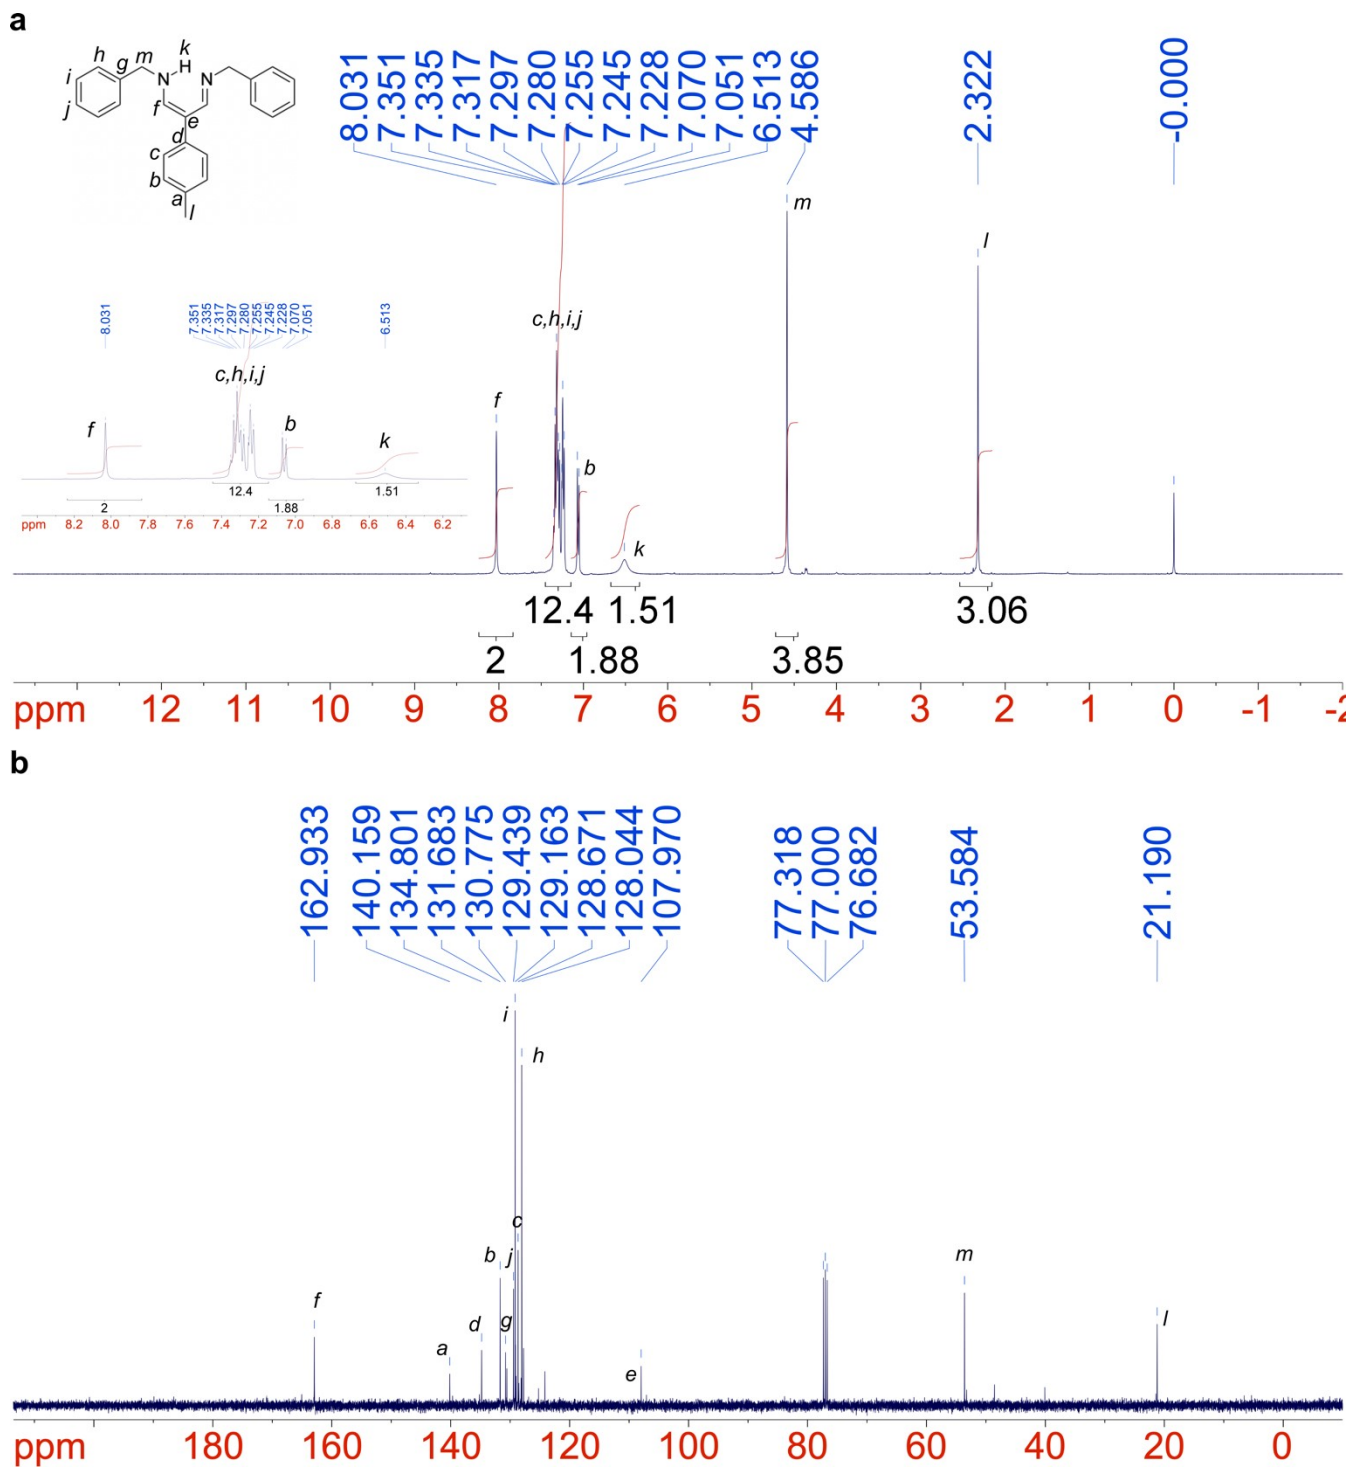

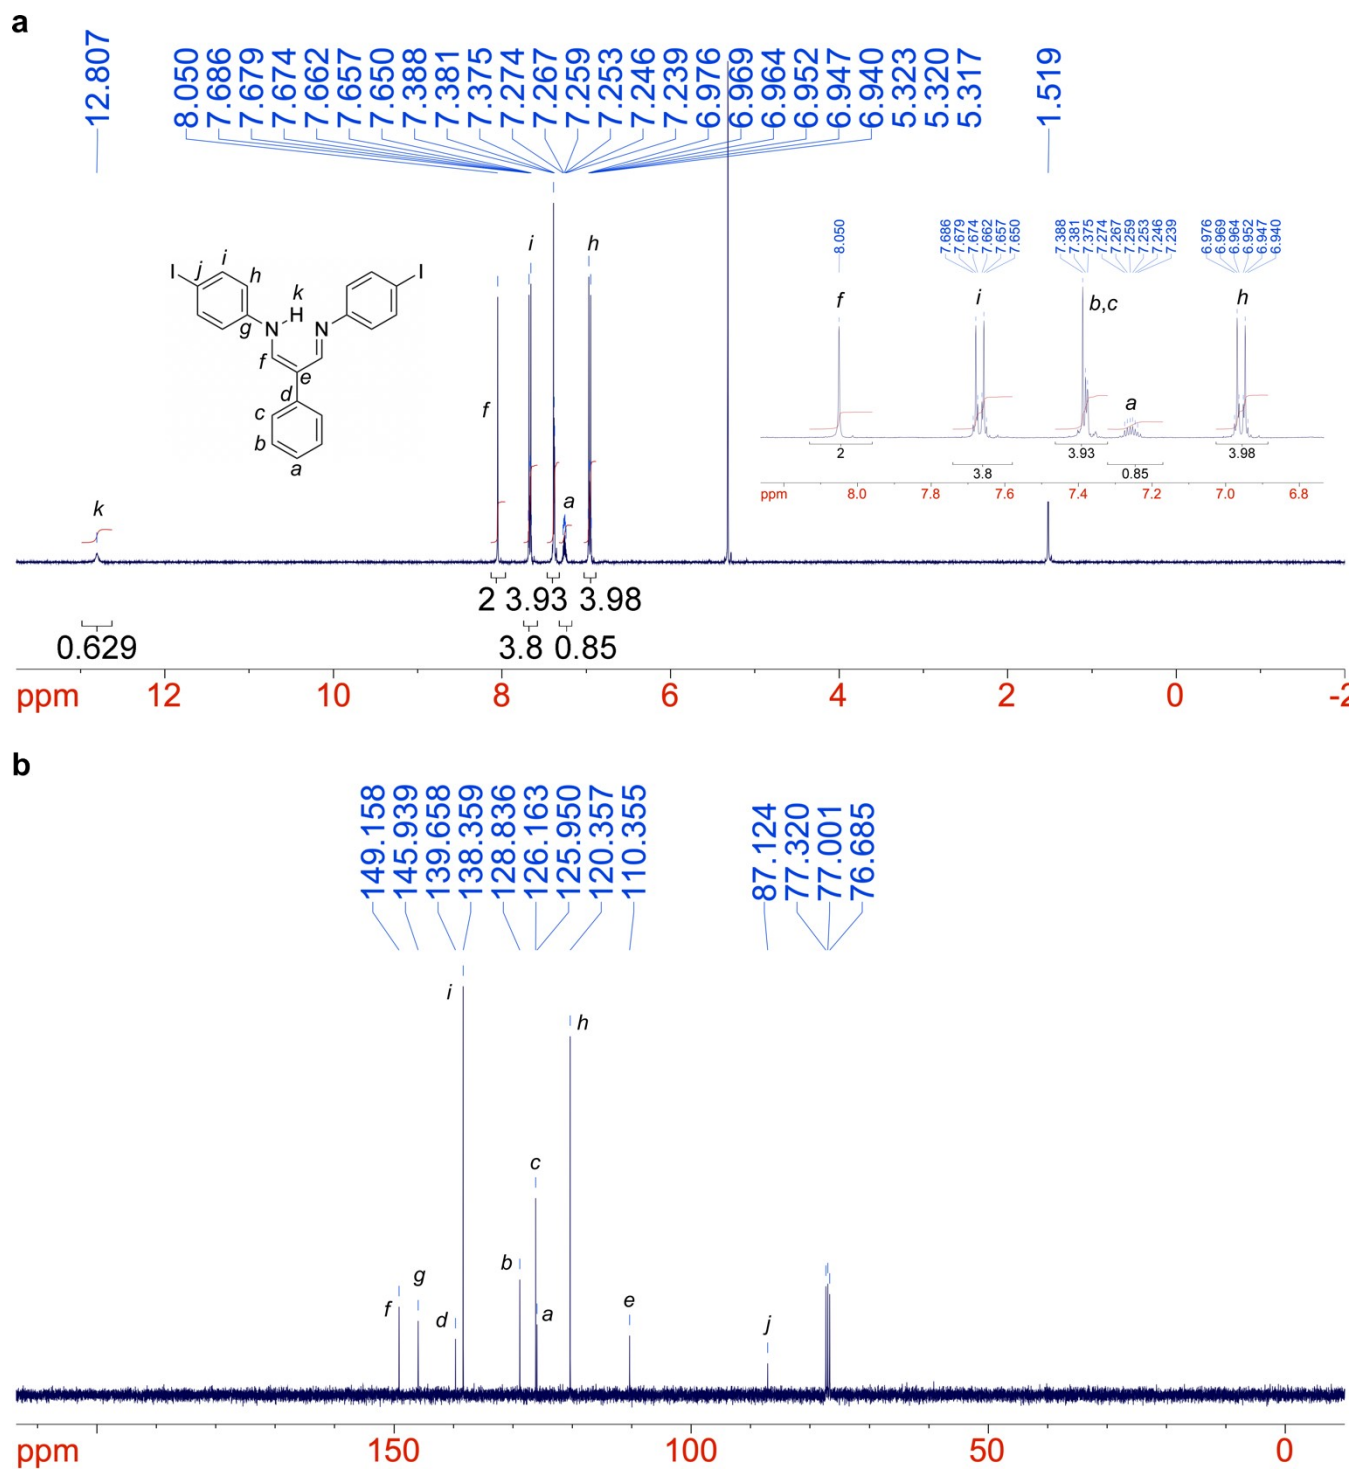

**Figure S19.** (a)  $^1\text{H}$  and (b)  $^{13}\text{C}\{^1\text{H}\}$  NMR spectra of **DAI-Ph-I\_L** in  $\text{CD}_2\text{Cl}_2$  and  $\text{CDCl}_3$ , respectively.

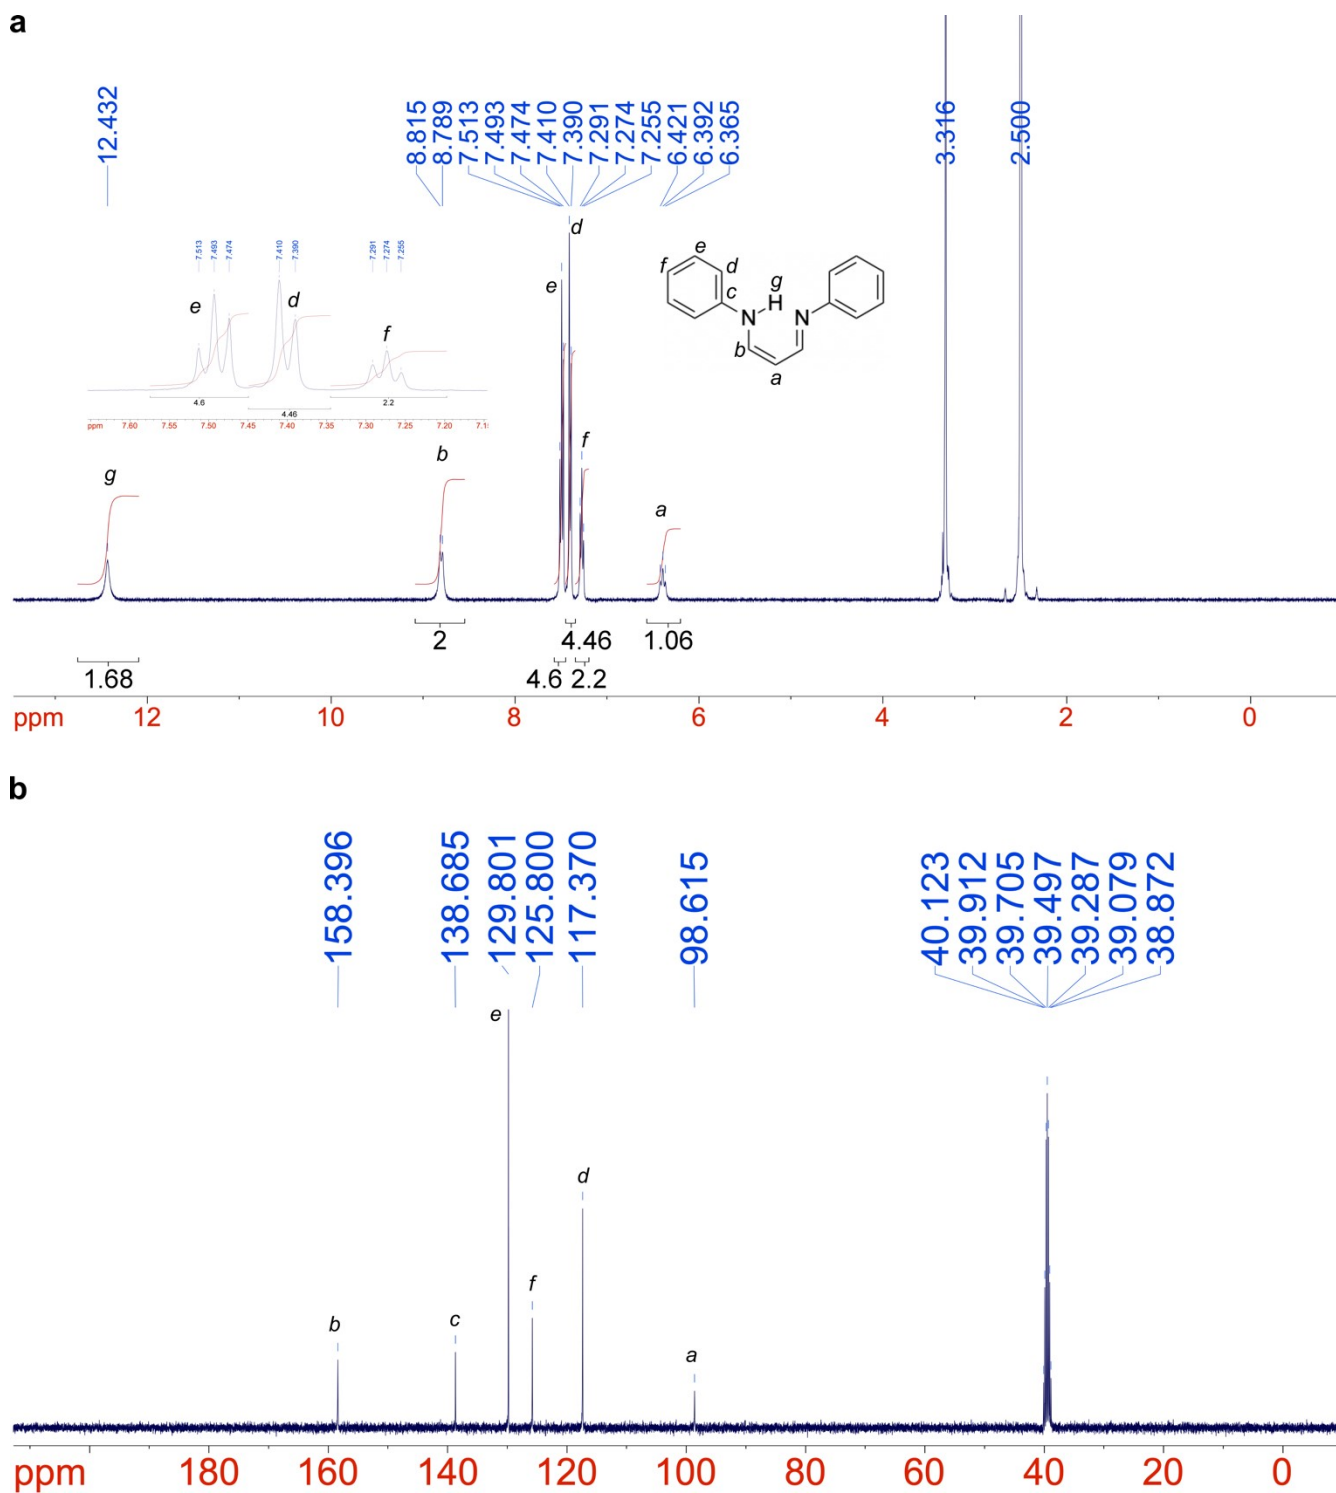

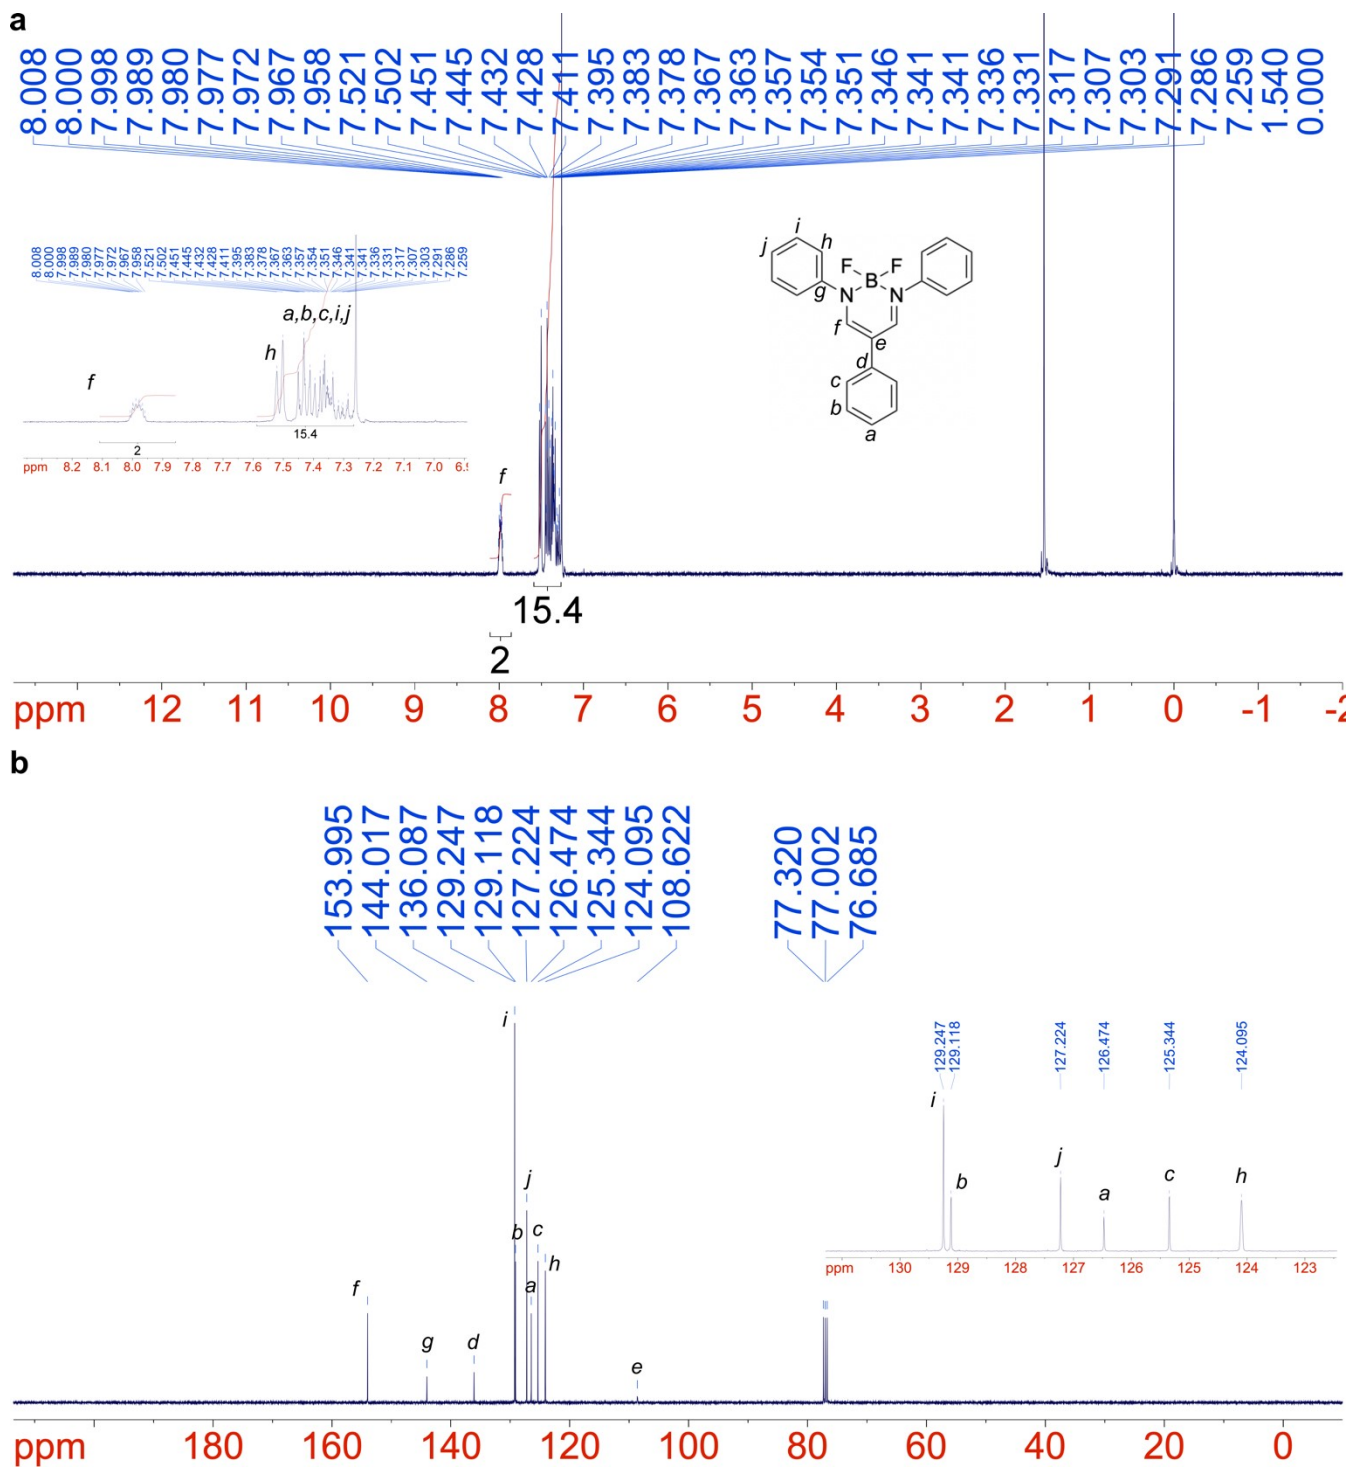

**Figure S21.** (a)  $^1\text{H}$  and (b)  $^{13}\text{C}\{^1\text{H}\}$  NMR spectra of **DAI-3Ph** in  $\text{CDCl}_3$ .

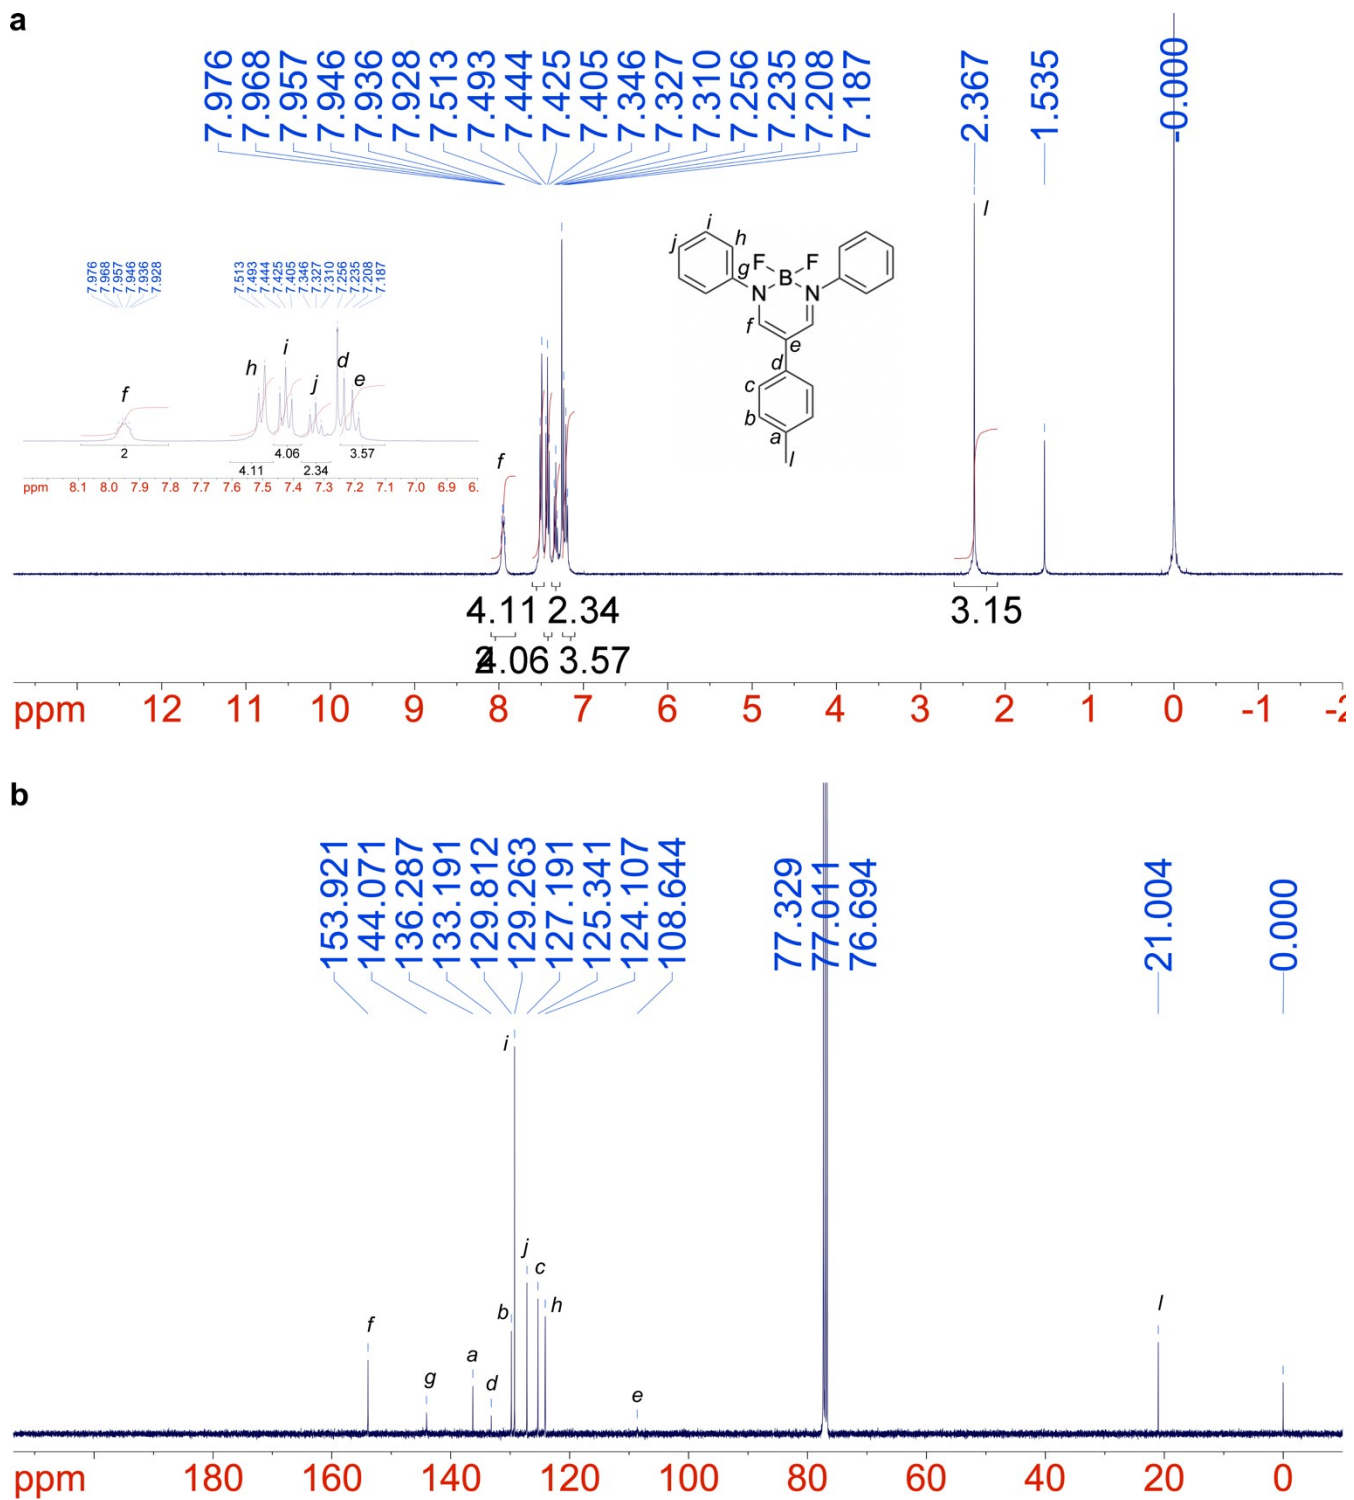

**Figure S22.** (a)  $^1\text{H}$  and (b)  $^{13}\text{C}\{^1\text{H}\}$  NMR spectra of **DAI-Tol** in  $\text{CDCl}_3$ .



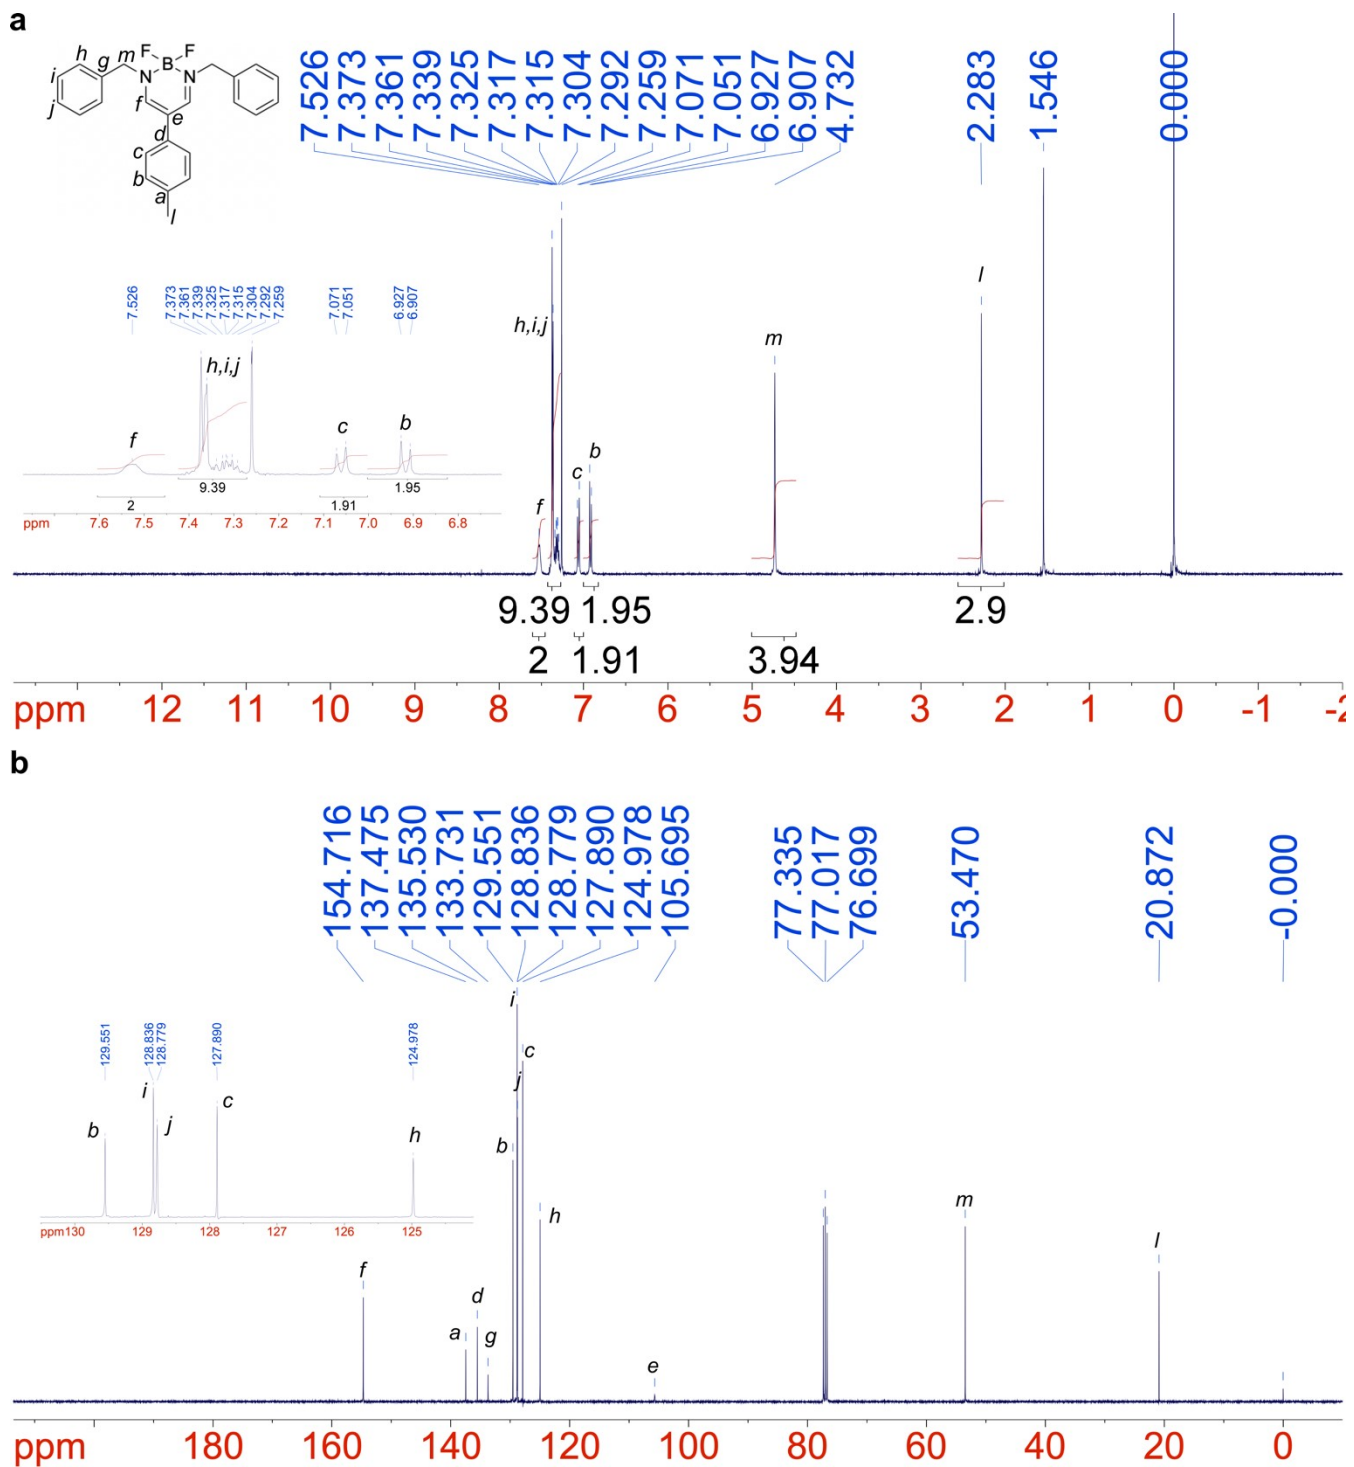

**Figure S23.** (a)  $^1\text{H}$  and (b)  $^{13}\text{C}\{^1\text{H}\}$  NMR spectra of **DAI-Bn** in  $\text{CDCl}_3$ .

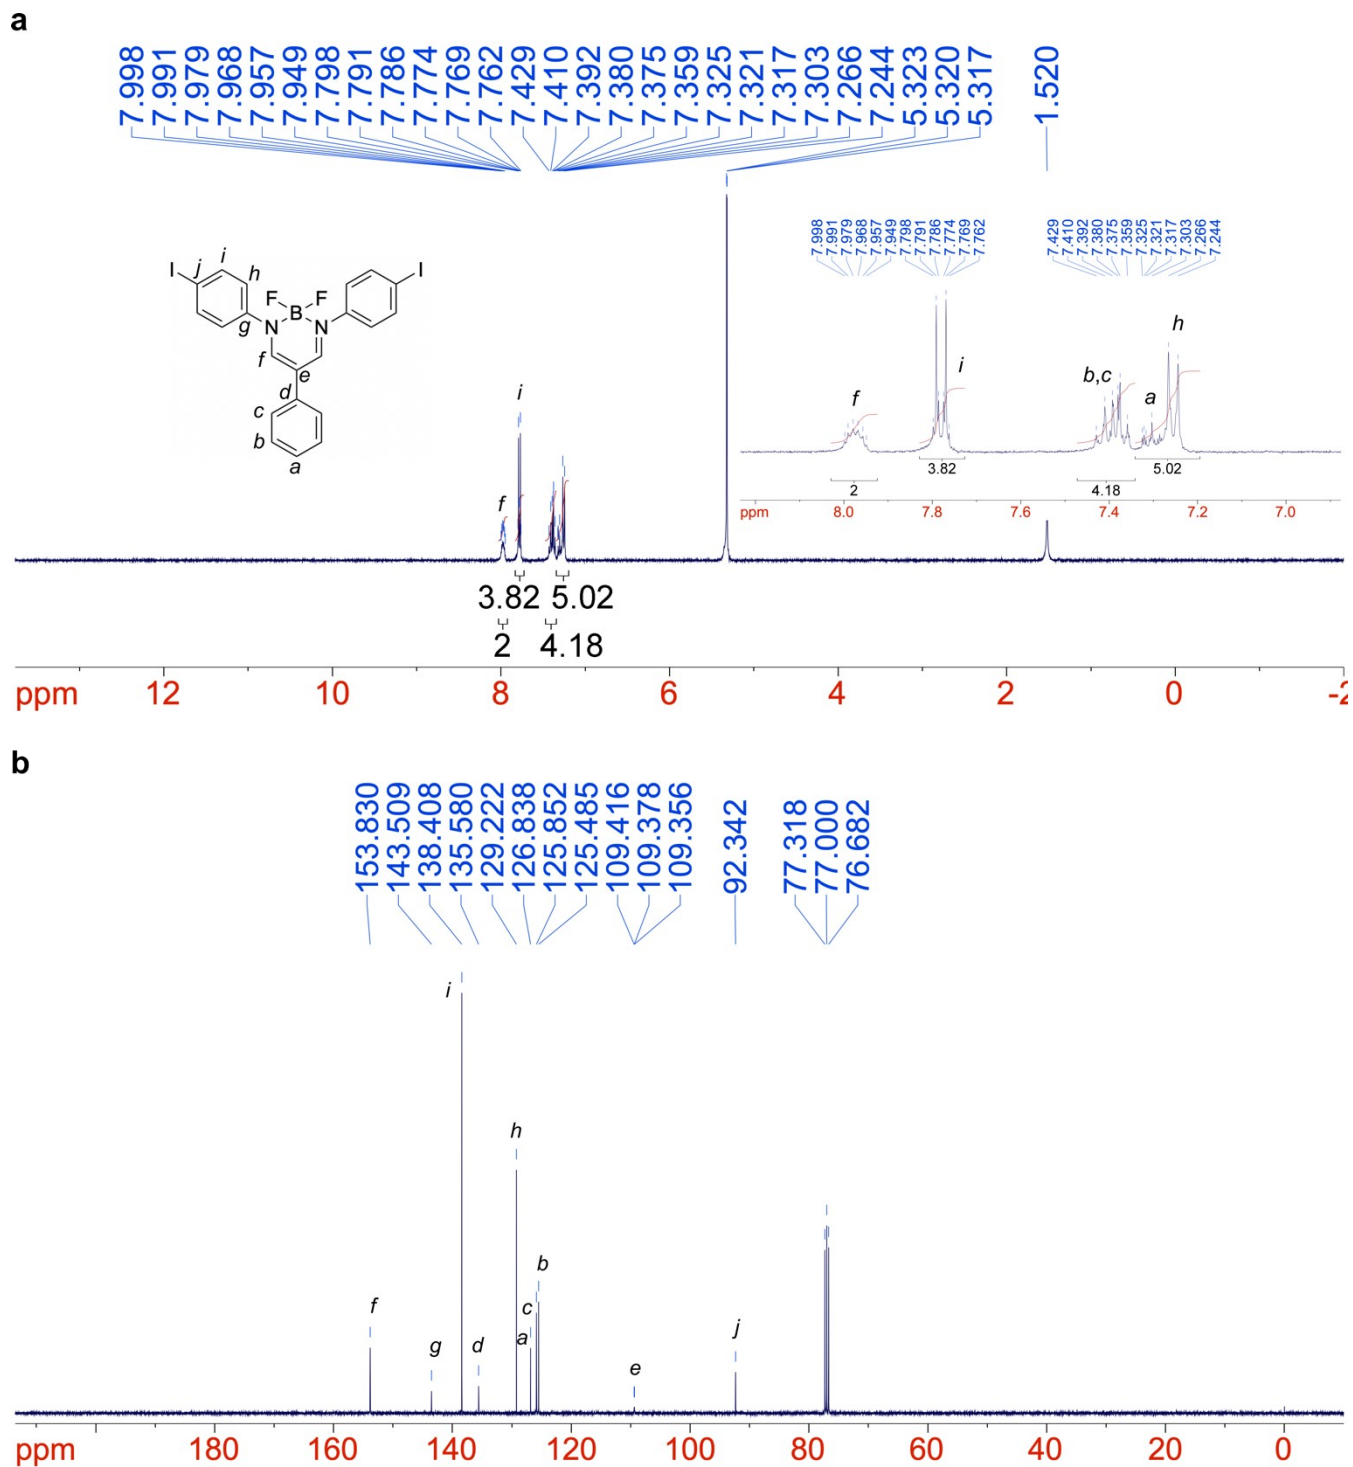

**Figure S24.** (a)  $^1\text{H}$  and (b)  $^{13}\text{C}\{^1\text{H}\}$  NMR spectra of DAI-3Ph-I in  $\text{CD}_2\text{Cl}_2$  and  $\text{CDCl}_3$ , respectively.

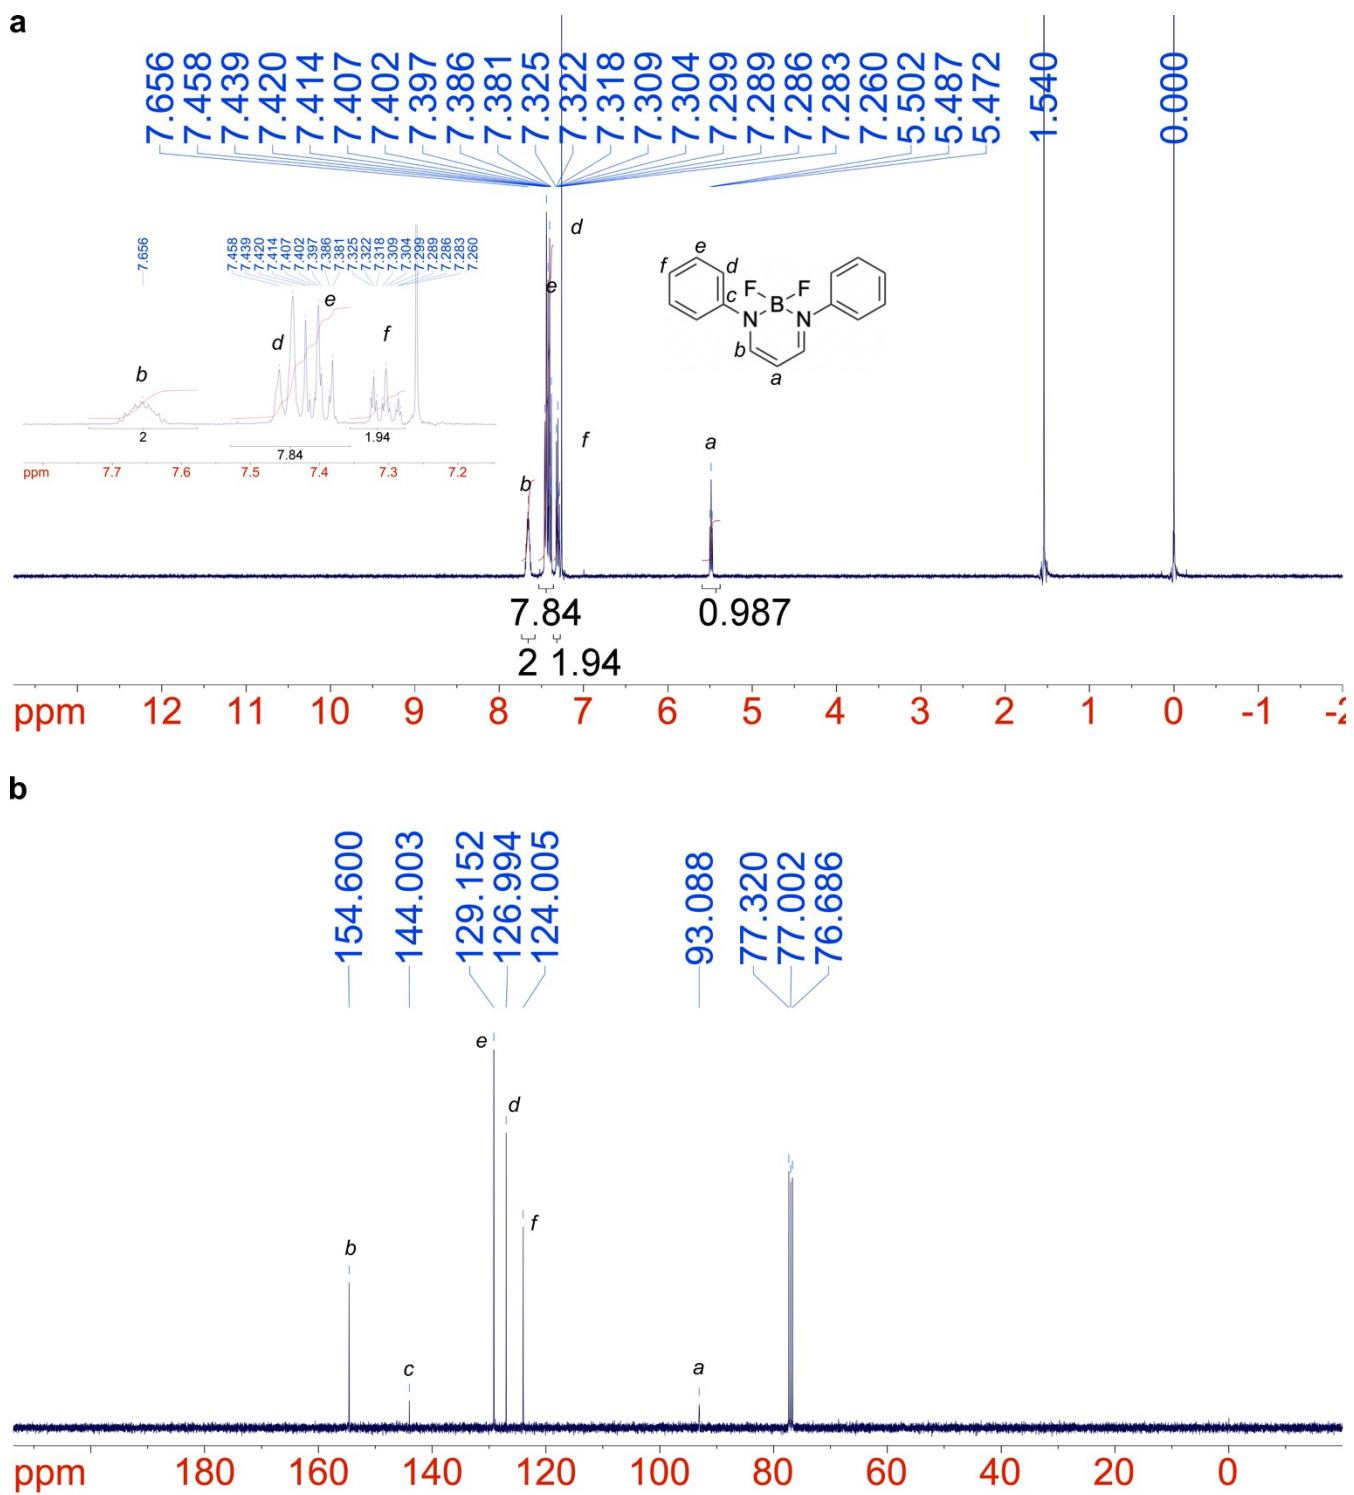

**Figure S25.** (a)  $^1\text{H}$  and (b)  $^{13}\text{C}\{^1\text{H}\}$  NMR spectra of **DAI-2Ph** in  $\text{CDCl}_3$ .

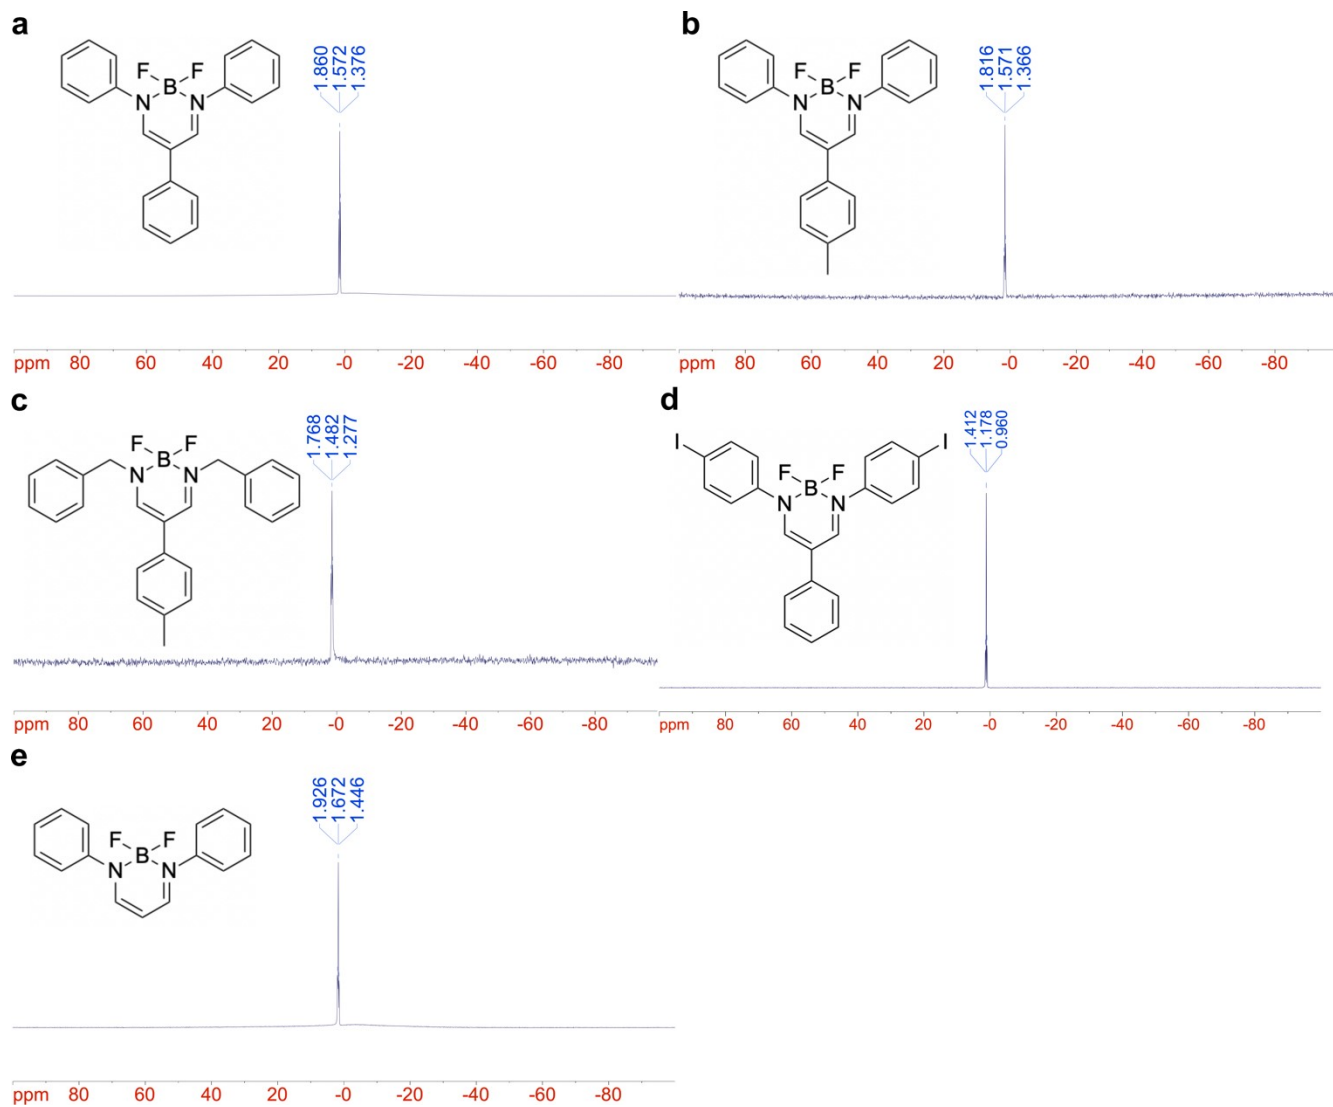

**Figure S26.**  $^{11}\text{B}\{^1\text{H}\}$  NMR spectra of (a) **DAI-3Ph**, (b) **DAI-Tol**, (c) **DAI-Bn**, (d) **DAI-3Ph-I**, and (e) **DAI-2Ph** in  $\text{CDCl}_3$ .

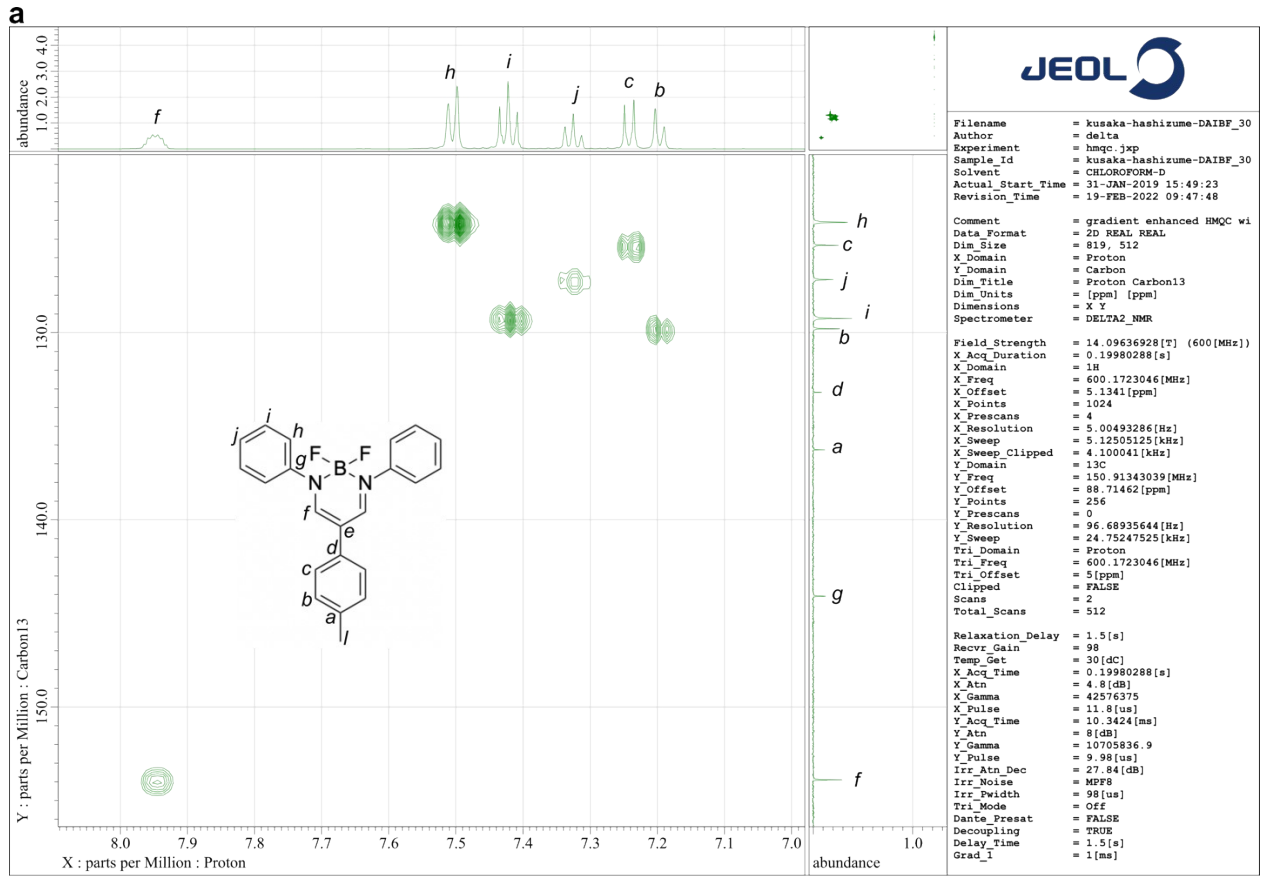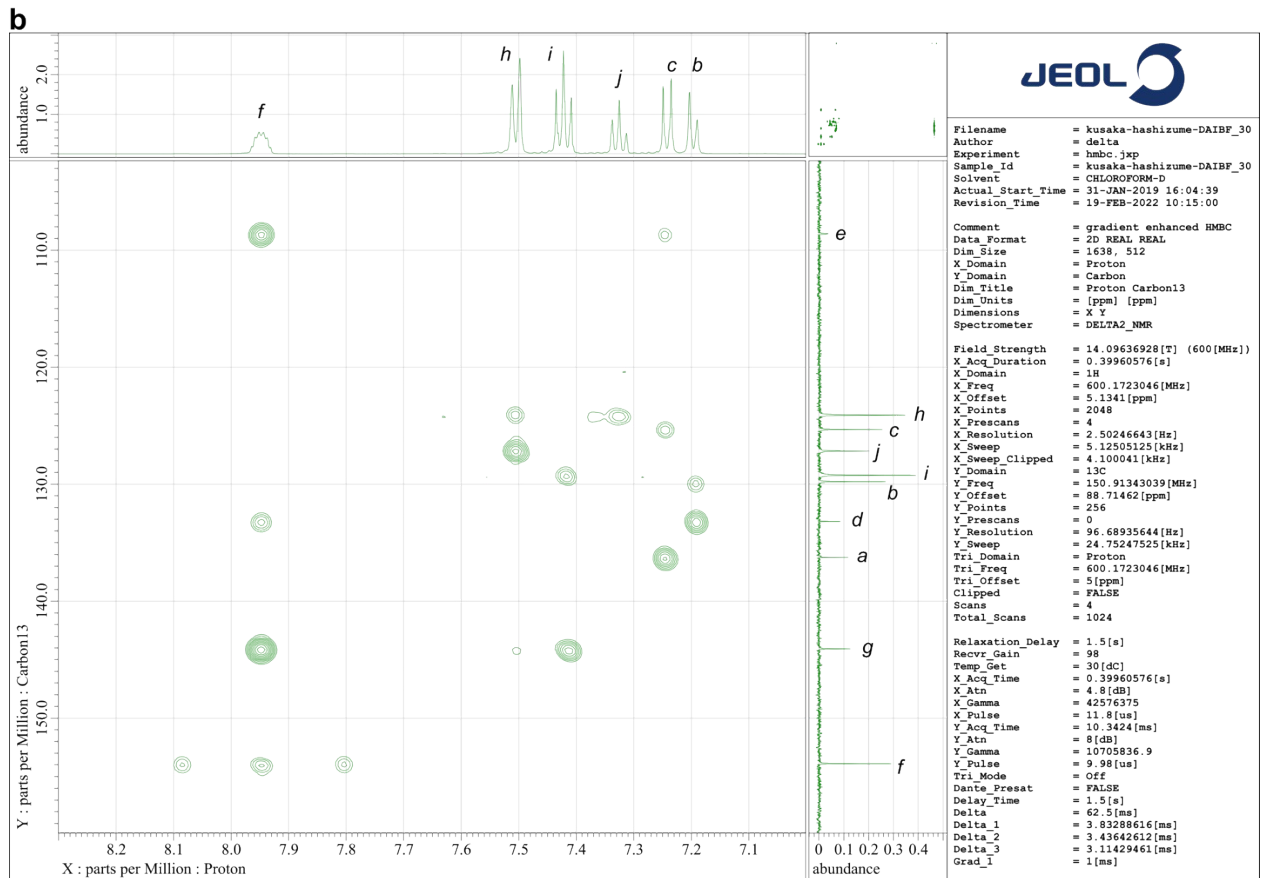

**Figure S27.** (a) HMQC ( $^1\text{H}$ - $^{13}\text{C}$ ) and (b) HMBC ( $^1\text{H}$ - $^{13}\text{C}$ ) spectra of **DAI-Tol** in  $\text{CDCl}_3$ .

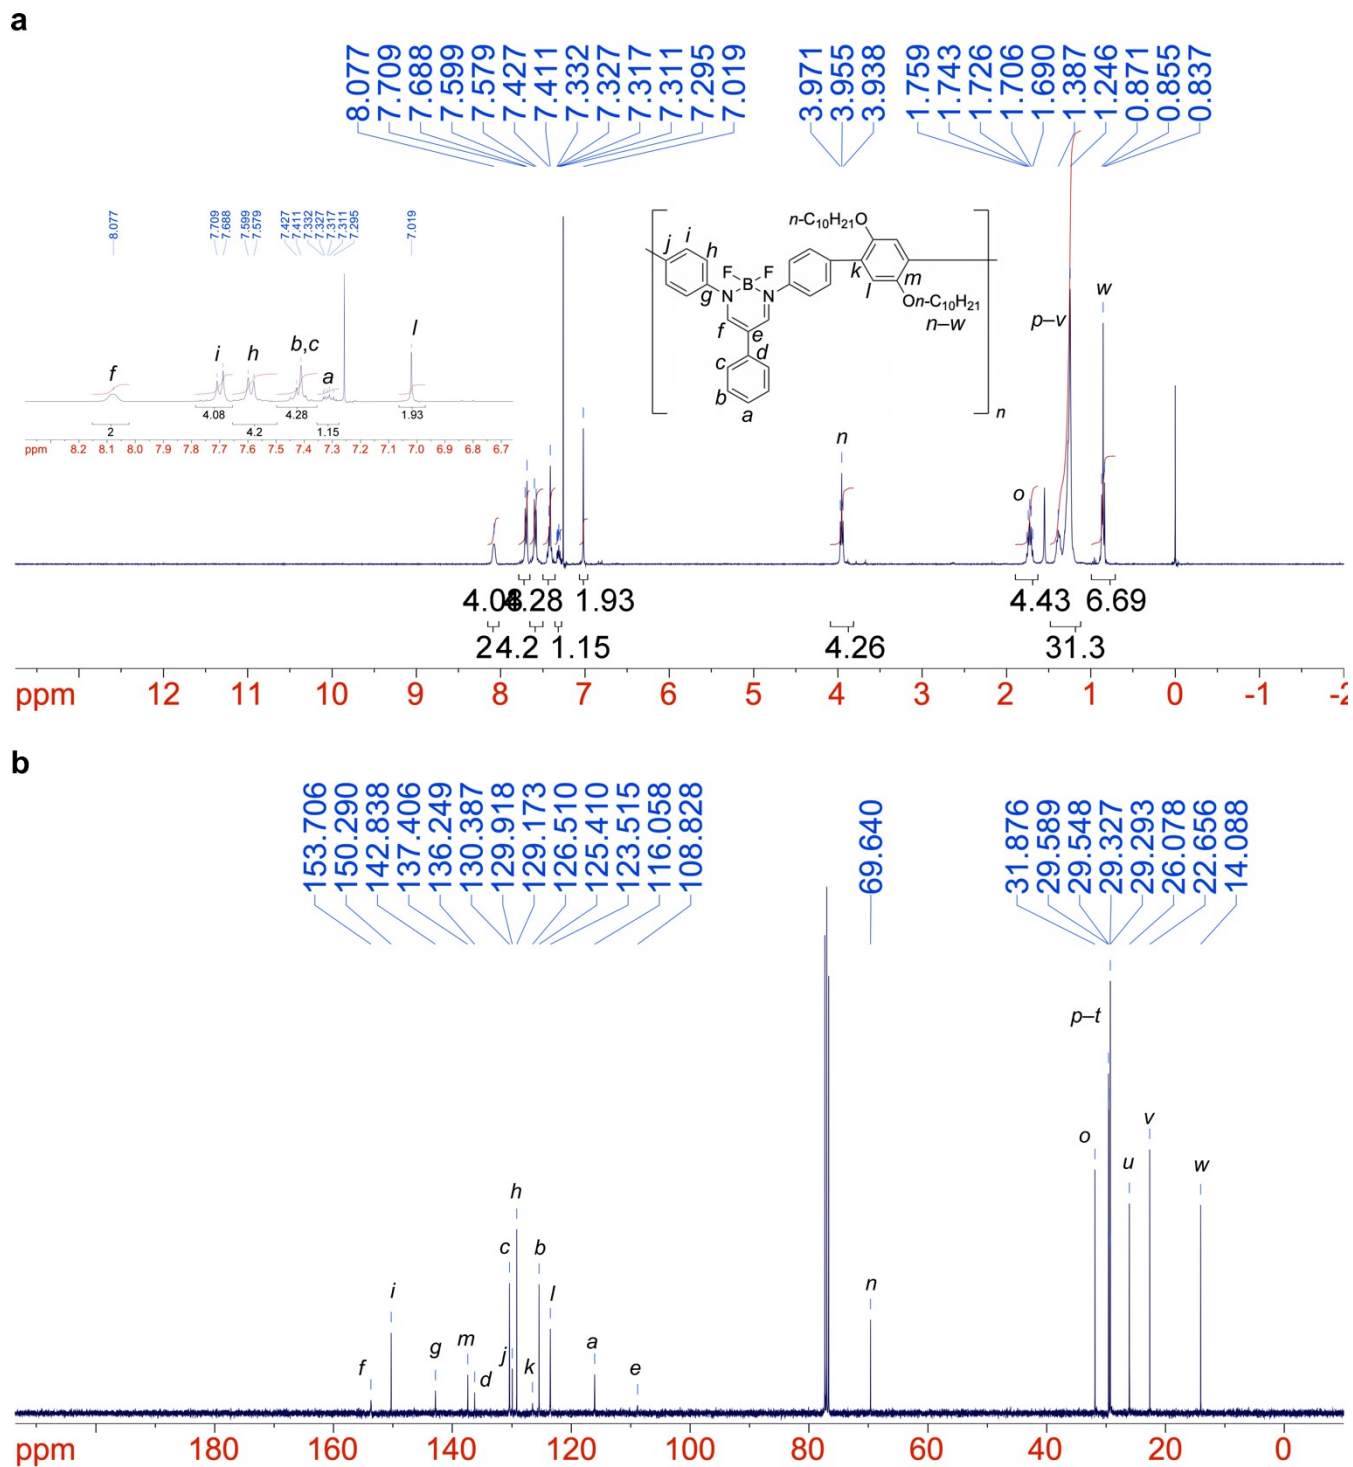

**Figure S28.** (a)  $^1\text{H}$  and (b)  $^{13}\text{C}\{^1\text{H}\}$  NMR spectra of PDAI-Ph in  $\text{CDCl}_3$ .

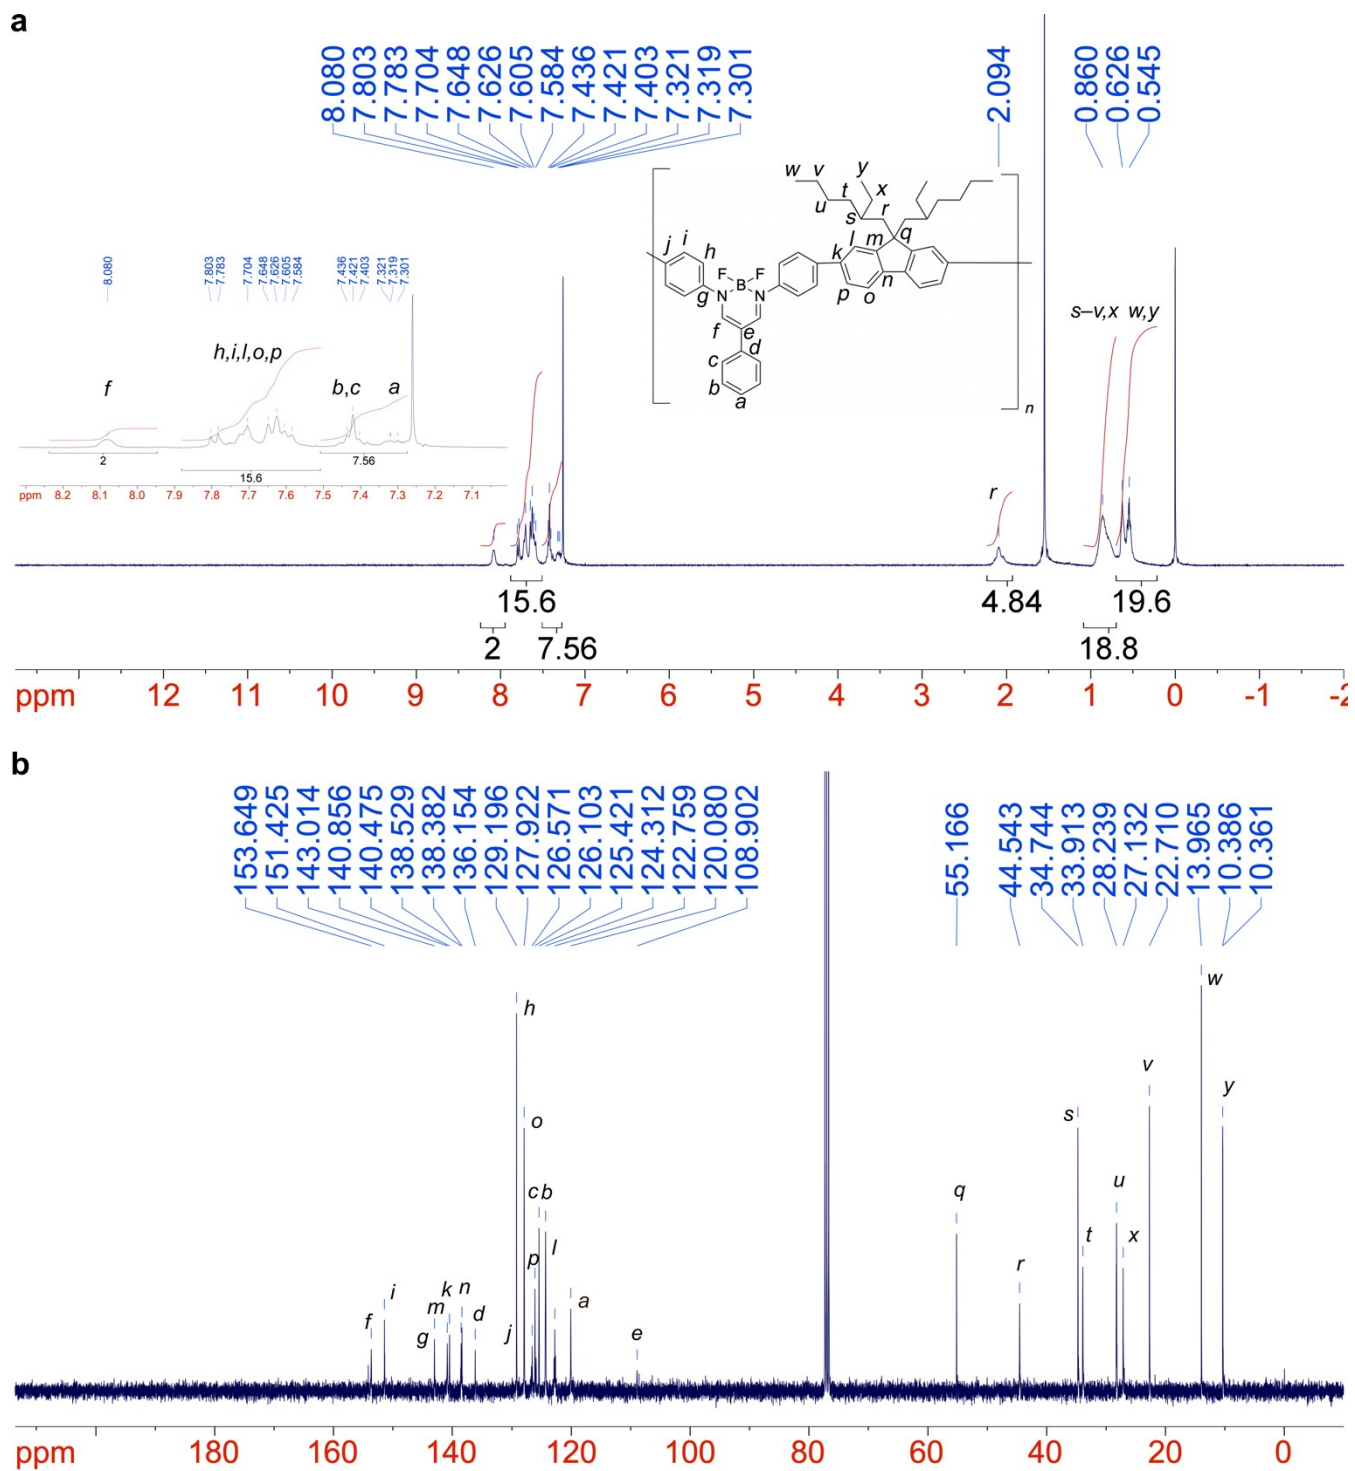



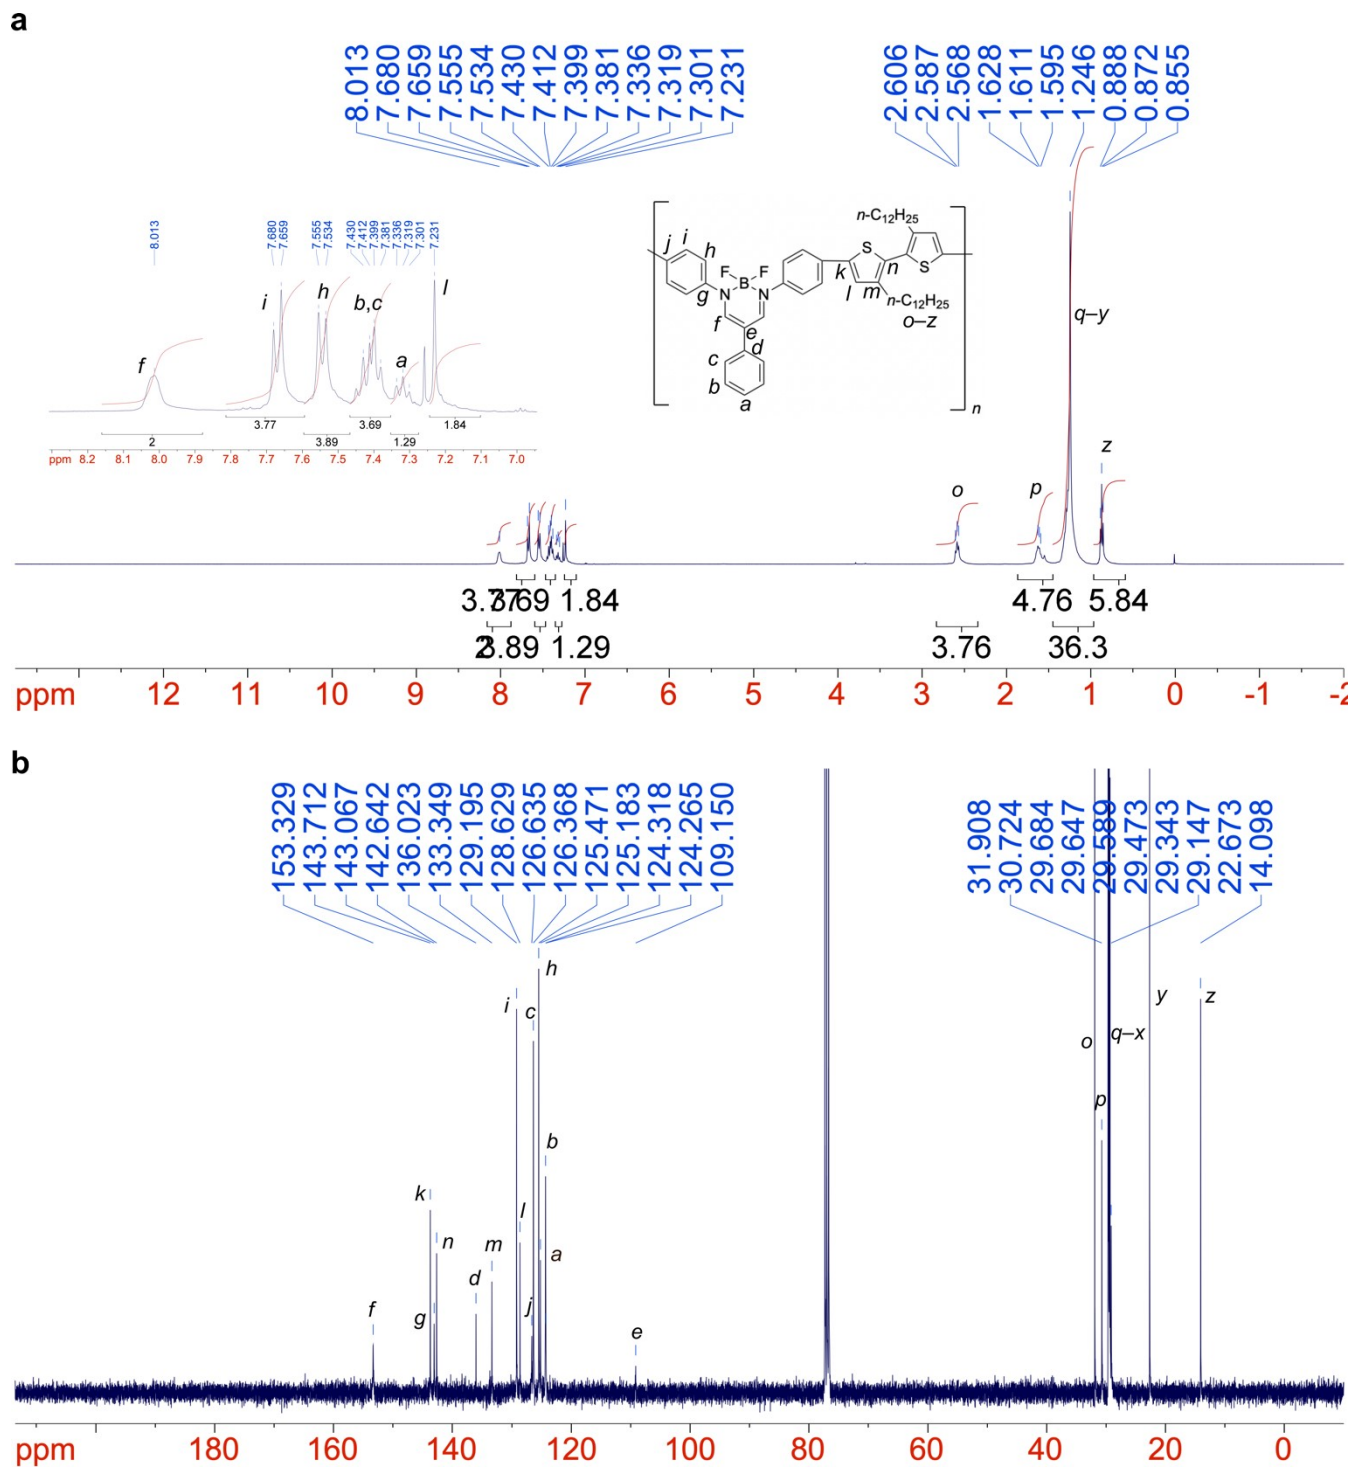

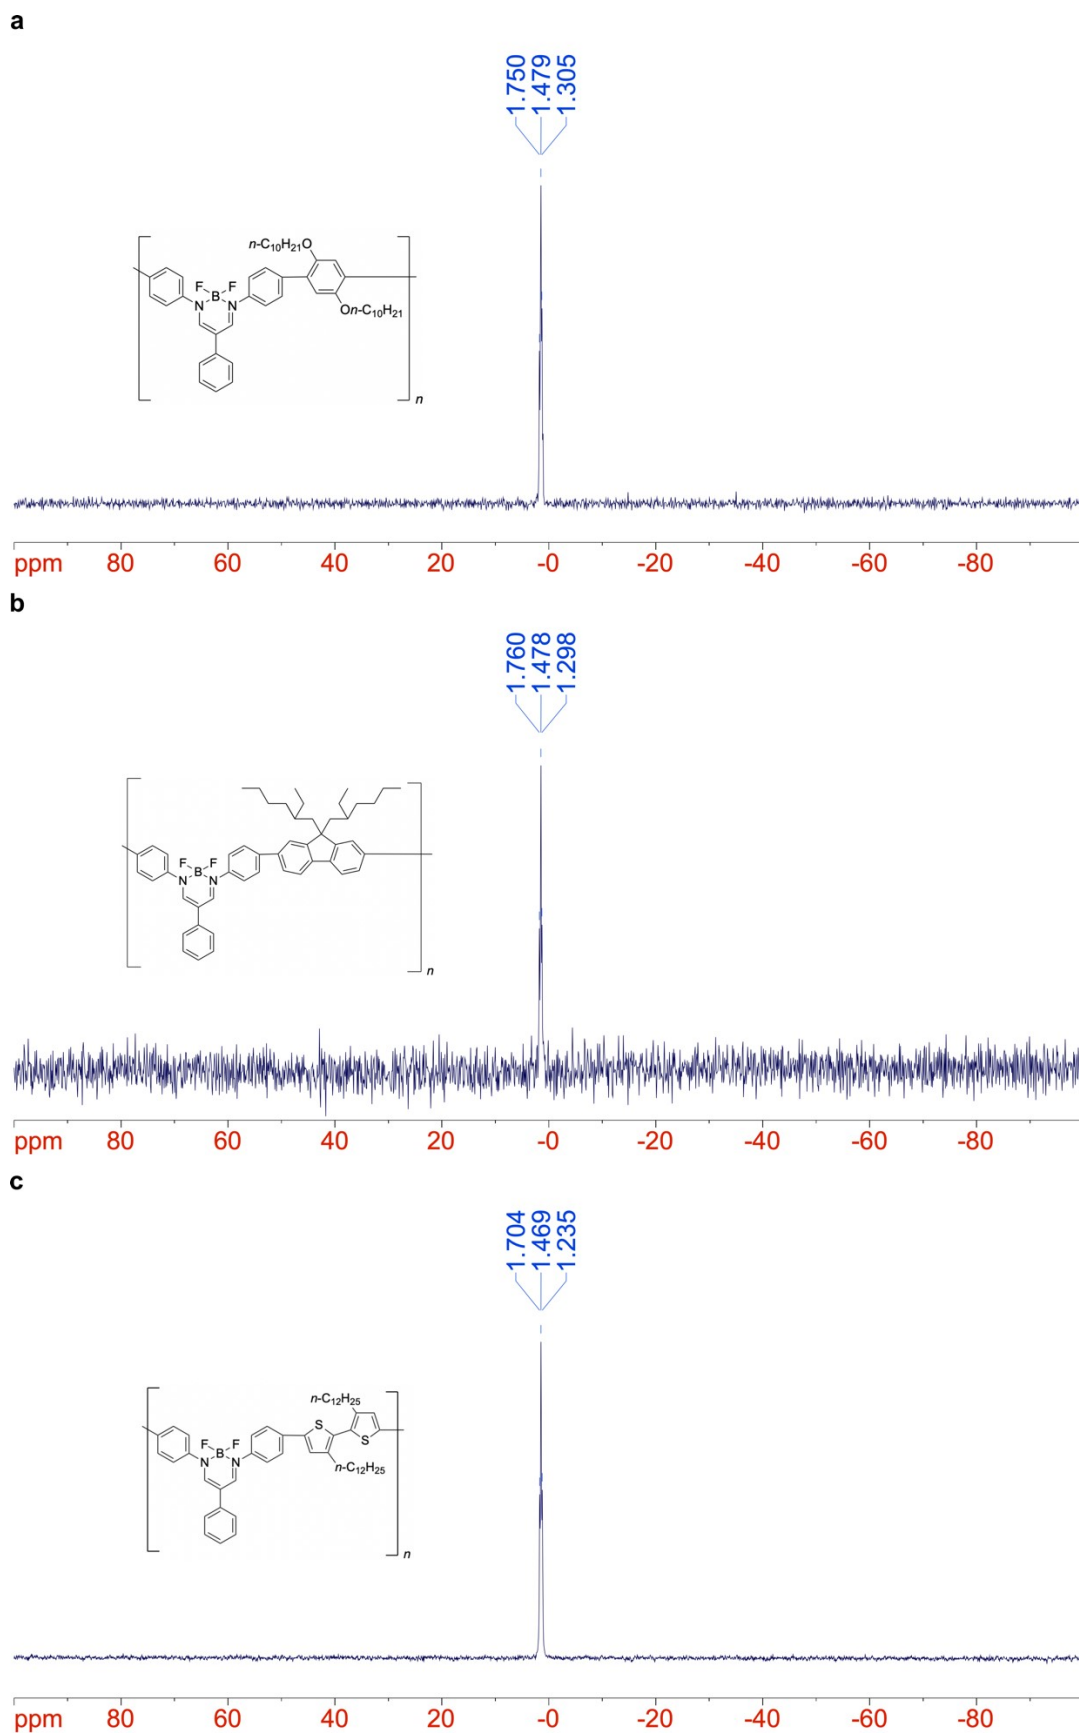

**Figure S31.**  $^{11}\text{B}\{^1\text{H}\}$  NMR spectra of (a) **PDAI-Ph**, (b) **PDAI-FL**, and (c) **PDAI-BT** in  $\text{CDCl}_3$ .



## Optimized Geometry and Calculated Properties

### DAI-3Ph

**Table S3.** Optimized geometry of **DAI-3Ph** at  $S_0$  state

| Atomic Number | Coordinates (Angstroms) |           |           |
|---------------|-------------------------|-----------|-----------|
|               | x                       | y         | z         |
| 5             | -0.000025               | -1.474929 | -0.000039 |
| 9             | -0.094689               | -2.271558 | -1.139924 |
| 9             | 0.094659                | -2.271678 | 1.13971   |
| 7             | 1.258532                | -0.555947 | -0.073151 |
| 7             | -1.258538               | -0.555931 | 0.073111  |
| 6             | -1.191311               | 0.763828  | 0.063612  |
| 6             | 0.000012                | 1.486402  | -0.000027 |
| 6             | 1.191334                | 0.763803  | -0.063676 |
| 6             | 0.000034                | 2.96785   | -0.000007 |
| 6             | -0.85122                | 3.687794  | 0.847017  |
| 6             | -0.858334               | 5.078391  | 0.840433  |
| 6             | 0.000065                | 5.780957  | 0.000021  |
| 6             | 0.858446                | 5.078386  | -0.84041  |
| 6             | 0.851302                | 3.687793  | -0.847022 |
| 1             | 0.000079                | 6.866006  | 0.000031  |
| 6             | 2.552231                | -1.17296  | -0.030386 |
| 6             | 2.868465                | -2.195825 | -0.923444 |
| 6             | 4.130583                | -2.777223 | -0.879754 |
| 6             | 5.078604                | -2.34715  | 0.044589  |
| 6             | 4.754504                | -1.333342 | 0.940255  |
| 6             | 3.491548                | -0.751785 | 0.910295  |
| 6             | -2.552248               | -1.172901 | 0.030397  |
| 6             | -2.868559               | -2.19562  | 0.923603  |
| 6             | -4.130694               | -2.776983 | 0.879965  |
| 6             | -5.078668               | -2.347016 | -0.044479 |
| 6             | -4.7545                 | -1.333356 | -0.940285 |
| 6             | -3.491525               | -0.751836 | -0.910369 |
| 1             | -2.136072               | 1.300656  | 0.099276  |
| 1             | 2.136098                | 1.300628  | -0.099311 |
| 1             | -1.498413               | 3.154155  | 1.536768  |
| 1             | -1.526616               | 5.614134  | 1.507263  |
| 1             | 1.526737                | 5.61413   | -1.507231 |
| 1             | 1.498479                | 3.154152  | -1.536787 |
| 1             | 2.125917                | -2.526652 | -1.638423 |
| 1             | 4.373663                | -3.571317 | -1.578274 |
| 1             | 6.061638                | -2.805637 | 0.072045  |
| 1             | 5.478706                | -1.002713 | 1.677715  |
| 1             | 3.224095                | 0.009943  | 1.635495  |
| 1             | -2.12605                | -2.526366 | 1.638659  |
| 1             | -4.373822               | -3.570957 | 1.578604  |
| 1             | -6.061718               | -2.80547  | -0.071905 |
| 1             | -5.478665               | -1.002811 | -1.677819 |
| 1             | -3.224027               | 0.009785  | -1.635666 |

**Table S4.** Calculated low frequencies for the optimized structure of **DAI-3Ph** at  $S_0$  state

Low Frequencies /  $\text{cm}^{-1}$ :

|         |         |         |         |         |        |
|---------|---------|---------|---------|---------|--------|
| -2.0516 | -0.6335 | -0.0003 | -0.0002 | -0.0002 | 1.1394 |
| 7.6271  | 37.6531 | 39.3847 |         |         |        |

**Table S5.** Calculated electronic transitions for the optimized structure of **DAI-3Ph** at  $S_0$  state

| Excited State | Spin Multiplicity | Energy / eV | Wavelength / nm | f      | Composition                                                                                                                                                                | Coefficient                                                                                         |
|---------------|-------------------|-------------|-----------------|--------|----------------------------------------------------------------------------------------------------------------------------------------------------------------------------|-----------------------------------------------------------------------------------------------------|
| 1             | Singlet-A         | 3.6806      | 336.86          | 0.4221 | HOMO -><br>LUMO                                                                                                                                                            | 0.69478                                                                                             |
| 2             | Singlet-A         | 5.0438      | 245.82          | 0.0123 | HOMO-5 -><br>LUMO+1<br>HOMO-2 -> LUMO+2<br>HOMO-2 -> LUMO+3<br>HOMO -> LUMO+2<br>HOMO -> LUMO+3                                                                            | -0.2711<br>0.18157<br>-0.13167<br>0.50879<br>-0.26562                                               |
| 3             | Singlet-A         | 5.0771      | 244.2           | 0.6168 | HOMO-2 -><br>LUMO+1<br>HOMO-1 -> LUMO<br>HOMO -> LUMO+1                                                                                                                    | 0.10362<br>0.23515<br>0.63068                                                                       |
| 4             | Singlet-A         | 5.1933      | 238.74          | 0.0006 | HOMO-4 -><br>LUMO+1<br>HOMO-4 -> LUMO+6<br>HOMO-4 -> LUMO+8<br>HOMO-3 -> LUMO<br>HOMO-3 -> LUMO+7<br>HOMO-2 -> LUMO+4<br>HOMO-1 -> LUMO+5<br>HOMO -> LUMO+4                | -0.11288<br>-0.16705<br>0.10654<br>0.38689<br>0.1511<br>0.1724<br>0.26534<br>-0.35264               |
| 5             | Singlet-A         | 5.1997      | 238.45          | 0.005  | HOMO-4 -> LUMO<br>HOMO-4 -> LUMO+7<br>HOMO-3 -> LUMO+1<br>HOMO-3 -> LUMO+6<br>HOMO-3 -> LUMO+8<br>HOMO-2 -> LUMO+5<br>HOMO-1 -> LUMO<br>HOMO-1 -> LUMO+4<br>HOMO -> LUMO+5 | 0.35732<br>0.15247<br>-0.10742<br>-0.16813<br>0.10651<br>0.19594<br>-0.19621<br>0.24419<br>-0.35359 |
| 6             | Singlet-A         | 5.2539      | 235.99          | 0.0469 | HOMO-2 -> LUMO                                                                                                                                                             | 0.67856                                                                                             |
| 7             | Singlet-A         | 5.2743      | 235.07          | 0.0029 | HOMO-4 -> LUMO<br>HOMO-1 -> LUMO<br>HOMO -> LUMO+1                                                                                                                         | 0.17824<br>0.60387<br>-0.22321                                                                      |
| 8             | Singlet-A         | 5.5619      | 222.92          | 0.0061 | HOMO-5 -><br>LUMO+1<br>HOMO-3 -> LUMO<br>HOMO -> LUMO+2<br>HOMO -> LUMO+3<br>HOMO -> LUMO+12                                                                               | 0.11142<br>-0.14577<br>0.34733<br>0.51334<br>0.16295                                                |
| 9             | Singlet-A         | 5.7008      | 217.49          | 0.0801 | HOMO-3 -> LUMO<br>HOMO-2 -> LUMO<br>HOMO -> LUMO+3<br>HOMO -> LUMO+4<br>HOMO -> LUMO+7                                                                                     | 0.46866<br>-0.10706<br>0.11504<br>0.41358<br>-0.17565                                               |
| 10            | Singlet-A         | 5.7094      | 217.16          | 0.0001 | HOMO-5 -> LUMO<br>HOMO-4 -> LUMO<br>HOMO -> LUMO+5                                                                                                                         | 0.63951<br>-0.22251<br>-0.13506                                                                     |
| 11            | Singlet-A         | 5.729       | 216.41          | 0.0038 | HOMO-5 -> LUMO<br>HOMO-4 -> LUMO<br>HOMO-1 -> LUMO<br>HOMO -> LUMO+5<br>HOMO -> LUMO+6                                                                                     | 0.28042<br>0.4586<br>-0.11456<br>0.38713<br>0.10349                                                 |

|                 |           |        |        |        |                  |          |
|-----------------|-----------|--------|--------|--------|------------------|----------|
| 12              | Singlet-A | 5.7738 | 214.74 | 0.0179 | HOMO-4 -> LUMO   | -0.17715 |
|                 |           |        |        |        | HOMO-4 -> LUMO+4 | -0.1093  |
|                 |           |        |        |        | HOMO-3 -> LUMO+5 | -0.11648 |
|                 |           |        |        |        | HOMO-1 -> LUMO+7 | 0.12987  |
|                 |           |        |        |        | HOMO -> LUMO+6   | 0.56555  |
|                 |           |        |        |        | HOMO -> LUMO+8   | -0.22141 |
| 13              | Singlet-A | 5.798  | 213.84 | 0.0343 | HOMO-4 -> LUMO+5 | 0.10586  |
|                 |           |        |        |        | HOMO-3 -> LUMO   | 0.21922  |
|                 |           |        |        |        | HOMO-3 -> LUMO+4 | 0.10955  |
|                 |           |        |        |        | HOMO-1 -> LUMO+6 | 0.11192  |
|                 |           |        |        |        | HOMO -> LUMO+7   | 0.52064  |
|                 |           |        |        |        | HOMO -> LUMO+9   | -0.24804 |
| 14              | Singlet-A | 5.993  | 206.88 | 0.0223 | HOMO-7 -> LUMO   | 0.18886  |
|                 |           |        |        |        | HOMO-6 -> LUMO   | 0.62145  |
| 15              | Singlet-A | 6.0559 | 204.73 | 0.0406 | HOMO-6 -> LUMO   | 0.11523  |
|                 |           |        |        |        | HOMO-6 -> LUMO+2 | 0.19272  |
|                 |           |        |        |        | HOMO-6 -> LUMO+3 | -0.10584 |
|                 |           |        |        |        | HOMO-5 -> LUMO+1 | 0.40636  |
|                 |           |        |        |        | HOMO-3 -> LUMO   | 0.10124  |
|                 |           |        |        |        | HOMO-2 -> LUMO+2 | -0.12251 |
|                 |           |        |        |        | HOMO-2 -> LUMO+4 | -0.12437 |
|                 |           |        |        |        | HOMO -> LUMO+2   | 0.22507  |
|                 |           |        |        |        | HOMO -> LUMO+3   | -0.28374 |
| HOMO -> LUMO+7  | -0.13457  |        |        |        |                  |          |
| 16              | Singlet-A | 6.0939 | 203.46 | 0.0003 | HOMO-1 -> LUMO+9 | 0.10112  |
|                 |           |        |        |        | HOMO -> LUMO+6   | 0.25461  |
|                 |           |        |        |        | HOMO -> LUMO+8   | 0.44135  |
|                 |           |        |        |        | HOMO -> LUMO+10  | -0.32478 |
|                 |           |        |        |        | HOMO -> LUMO+11  | -0.19369 |
|                 |           |        |        |        | HOMO -> LUMO+15  | -0.13241 |
| 17              | Singlet-A | 6.2044 | 199.83 | 0.0255 | HOMO-6 -> LUMO+4 | 0.14385  |
|                 |           |        |        |        | HOMO-5 -> LUMO+1 | 0.17245  |
|                 |           |        |        |        | HOMO-4 -> LUMO+6 | -0.16401 |
|                 |           |        |        |        | HOMO-4 -> LUMO+8 | 0.10094  |
|                 |           |        |        |        | HOMO-3 -> LUMO   | -0.15723 |
|                 |           |        |        |        | HOMO-3 -> LUMO+7 | 0.20249  |
|                 |           |        |        |        | HOMO-3 -> LUMO+9 | -0.10504 |
|                 |           |        |        |        | HOMO-2 -> LUMO+4 | 0.17276  |
|                 |           |        |        |        | HOMO-1 -> LUMO+5 | 0.20047  |
|                 |           |        |        |        | HOMO -> LUMO+3   | -0.1052  |
|                 |           |        |        |        | HOMO -> LUMO+4   | 0.38396  |
| HOMO -> LUMO+7  | 0.15823   |        |        |        |                  |          |
| 18              | Singlet-A | 6.2122 | 199.58 | 0.0032 | HOMO-4 -> LUMO+7 | 0.1342   |
|                 |           |        |        |        | HOMO-3 -> LUMO+6 | -0.12282 |
|                 |           |        |        |        | HOMO-2 -> LUMO+5 | 0.11882  |
|                 |           |        |        |        | HOMO-1 -> LUMO+4 | 0.10722  |
|                 |           |        |        |        | HOMO -> LUMO+5   | 0.2019   |
|                 |           |        |        |        | HOMO -> LUMO+8   | 0.28101  |
|                 |           |        |        |        | HOMO -> LUMO+10  | 0.42837  |
|                 |           |        |        |        | HOMO -> LUMO+11  | -0.20442 |
| HOMO -> LUMO+16 | -0.14805  |        |        |        |                  |          |
| 19              | Singlet-A | 6.2441 | 198.56 | 0.0425 | HOMO-6 -> LUMO+5 | 0.13657  |

|    |           |        |        |        |                  |          |
|----|-----------|--------|--------|--------|------------------|----------|
|    |           |        |        |        | HOMO-4 -> LUMO   | -0.13863 |
|    |           |        |        |        | HOMO-4 -> LUMO+7 | 0.17309  |
|    |           |        |        |        | HOMO-4 -> LUMO+9 | -0.11038 |
|    |           |        |        |        | HOMO-3 -> LUMO+6 | -0.15691 |
|    |           |        |        |        | HOMO-3 -> LUMO+8 | 0.10342  |
|    |           |        |        |        | HOMO-2 -> LUMO+5 | 0.17012  |
|    |           |        |        |        | HOMO-1 -> LUMO+4 | 0.19145  |
|    |           |        |        |        | HOMO -> LUMO+5   | 0.35846  |
|    |           |        |        |        | HOMO -> LUMO+10  | -0.3474  |
| 20 | Singlet-A | 6.2995 | 196.82 | 0.0069 | HOMO-2 -> LUMO+2 | 0.13284  |
|    |           |        |        |        | HOMO-2 -> LUMO+3 | 0.15974  |
|    |           |        |        |        | HOMO-1 -> LUMO+8 | 0.12821  |
|    |           |        |        |        | HOMO -> LUMO+7   | 0.23549  |
|    |           |        |        |        | HOMO -> LUMO+9   | 0.51072  |
|    |           |        |        |        | HOMO -> LUMO+12  | -0.1631  |

**Table S6.** Optimized geometry of **DAI-3Ph** at  $S_1$  state

| Atomic Number | Coordinates (Angstroms) |           |           |
|---------------|-------------------------|-----------|-----------|
|               | x                       | y         | z         |
| 5             | 0.00172                 | -1.427874 | -0.000031 |
| 9             | 0.136105                | -2.218421 | 1.140796  |
| 9             | -0.13072                | -2.218878 | -1.140669 |
| 7             | -1.286696               | -0.54268  | 0.118539  |
| 7             | 1.288168                | -0.539604 | -0.11864  |
| 6             | 1.205969                | 0.808456  | -0.207846 |
| 6             | -0.001651               | 1.50069   | 0.000011  |
| 6             | -1.207737               | 0.805407  | 0.207841  |
| 6             | -0.003579               | 2.965313  | 0.000072  |
| 6             | 0.923574                | 3.69375   | -0.768148 |
| 6             | 0.918145                | 5.080966  | -0.769889 |
| 6             | -0.007158               | 5.781844  | 0.000286  |
| 6             | -0.930688               | 5.078494  | 0.770341  |
| 6             | -0.9326                 | 3.691266  | 0.768389  |
| 1             | -0.008541               | 6.866863  | 0.000359  |
| 6             | -2.536731               | -1.160153 | 0.032006  |
| 6             | -2.676684               | -2.529345 | 0.344267  |
| 6             | -3.919094               | -3.136505 | 0.283577  |
| 6             | -5.052593               | -2.416599 | -0.093806 |
| 6             | -4.920965               | -1.069821 | -0.425079 |
| 6             | -3.685032               | -0.444881 | -0.369235 |
| 6             | 2.539576                | -1.1541   | -0.032174 |
| 6             | 2.682473                | -2.523347 | -0.3431   |
| 6             | 3.926229                | -3.127688 | -0.282483 |
| 6             | 5.058315                | -2.404887 | 0.093542  |
| 6             | 4.923901                | -1.058093 | 0.423566  |
| 6             | 3.686578                | -0.435961 | 0.367782  |
| 1             | 2.116152                | 1.355801  | -0.397567 |
| 1             | -2.119201               | 1.35063   | 0.397606  |
| 1             | 1.631593                | 3.167273  | -1.398419 |
| 1             | 1.635626                | 5.618558  | -1.381274 |
| 1             | -1.649539               | 5.614159  | 1.381804  |
| 1             | -1.639316               | 3.162942  | 1.398572  |
| 1             | -1.811553               | -3.097217 | 0.656112  |
| 1             | -4.003903               | -4.187937 | 0.538817  |
| 1             | -6.022256               | -2.901076 | -0.139241 |

|   |           |           |           |
|---|-----------|-----------|-----------|
| 1 | -5.78741  | -0.501752 | -0.748937 |
| 1 | -3.604947 | 0.586276  | -0.690097 |
| 1 | 1.818471  | -3.093431 | -0.653889 |
| 1 | 4.013243  | -4.179155 | -0.536692 |
| 1 | 6.029077  | -2.887164 | 0.138926  |
| 1 | 5.789247  | -0.487828 | 0.746376  |
| 1 | 3.604398  | 0.595263  | 0.687747  |

**Table S7.** Calculated low frequencies for the optimized structure of **DAI-3Ph** at  $S_1$  state

|                  |         |         |        |        |        |
|------------------|---------|---------|--------|--------|--------|
| Low Frequencies: |         |         |        |        |        |
| -7.1737          | -6.1231 | 0.0004  | 0.0006 | 0.0008 | 2.0195 |
| 36.5769          | 42.5114 | 43.0882 |        |        |        |

**Table S8.** Calculated electronic transition for the optimized structure of **DAI-3Ph** at  $S_1$  state

| Excited State | Spin Multiplicity | Energy / eV | Wavelength / nm | f      | Composition  | Coefficient |
|---------------|-------------------|-------------|-----------------|--------|--------------|-------------|
| 1             | Singlet-A         | 2.9009      | 427.4           | 0.4408 | HOMO -> LUMO | 0.69813     |

**Table S9.** Optimized geometry of **DAI-3Ph** at FF MECI

| Element | Coordinates (Angstroms) |            |            |
|---------|-------------------------|------------|------------|
|         | x                       | y          | z          |
| F       | -2.5387469              | 0.89560858 | 1.39324881 |
| F       | -0.926364               | -0.2185603 | 2.6200481  |
| N       | -1.0665871              | -0.6503568 | 0.18479144 |
| N       | -0.0766382              | 1.3917239  | 1.0310345  |
| C       | 1.18508282              | 0.73381212 | 1.186775   |
| C       | 1.36036486              | -0.3260362 | 0.24553682 |
| C       | 0.22309663              | -0.9375099 | -0.2330065 |
| C       | 2.7147289               | -0.8382411 | -0.0964593 |
| C       | 3.66363075              | -1.0869945 | 0.90435636 |
| C       | 4.92657701              | -1.5663012 | 0.5819109  |
| C       | 5.26503495              | -1.811226  | -0.7467451 |
| C       | 4.33761274              | -1.5704019 | -1.7427257 |
| C       | 3.07392495              | -1.0815676 | -1.42405   |
| H       | 6.24022976              | -2.1843209 | -0.9939603 |
| C       | -2.1038187              | -1.5809726 | -0.1449165 |
| C       | -3.2561851              | -1.1357442 | -0.7943579 |
| C       | -4.263987               | -2.034374  | -1.1204061 |
| C       | -4.1266424              | -3.3853405 | -0.8108013 |
| C       | -2.9868839              | -3.8290805 | -0.1661268 |
| C       | -1.9796683              | -2.9316091 | 0.17592235 |
| C       | -0.1631119              | 2.48289544 | 0.23041866 |
| C       | -1.4257776              | 2.99868721 | -0.1726867 |
| C       | -1.4848767              | 4.10760598 | -0.994012  |
| C       | -0.316098               | 4.7376995  | -1.4318343 |
| C       | 0.92326892              | 4.25496303 | -1.0251254 |
| C       | 1.0115593               | 3.15712666 | -0.2015377 |
| H       | 1.67216752              | 0.8150702  | 2.13551752 |
| H       | 0.31583715              | -1.7521106 | -0.9232434 |
| H       | 3.40874881              | -0.9258716 | 1.93475537 |
| H       | 5.638849                | -1.7569126 | 1.36170947 |
| H       | 4.59126906              | -1.751925  | -2.7697132 |
| H       | 2.37094083              | -0.8765568 | -2.2088265 |
| H       | -3.3517442              | -0.0961314 | -1.0317077 |



---

|   |            |            |            |
|---|------------|------------|------------|
| H | -5.1486442 | -1.6846741 | -1.6170073 |
| H | -4.9054072 | -4.0775832 | -1.0675444 |
| H | -2.8795996 | -4.866758  | 0.08580108 |
| H | -1.1101671 | -3.2712056 | 0.70504214 |
| H | -2.3192949 | 2.52623403 | 0.16659814 |
| H | -2.44112   | 4.48712115 | -1.2954486 |
| H | -0.3754864 | 5.59957871 | -2.0668508 |
| H | 1.82036524 | 4.74911553 | -1.3424959 |
| H | 1.9684361  | 2.81335402 | 0.13045498 |

---

**DAI-Tol****Table S10.** Optimized geometry of **DAI-Tol** at  $S_0$  state

| Atomic Number | Coordinates (Angstroms) |           |           | z         |
|---------------|-------------------------|-----------|-----------|-----------|
|               | x                       | y         |           |           |
| 5             |                         | -1.796182 | 0.005933  | -0.006946 |
| 9             |                         | -2.585073 | 0.104089  | -1.152455 |
| 9             |                         | -2.602032 | -0.085647 | 1.12694   |
| 7             |                         | -0.882132 | -1.256168 | -0.073863 |
| 7             |                         | -0.872892 | 1.260582  | 0.072472  |
| 6             |                         | 0.447053  | 1.188238  | 0.063372  |
| 6             |                         | 1.165352  | -0.005381 | 0.000534  |
| 6             |                         | 0.438339  | -1.193703 | -0.061836 |
| 6             |                         | 2.646977  | -0.010472 | 0.001703  |
| 6             |                         | 3.373791  | 0.825619  | 0.85614   |
| 6             |                         | 4.763713  | 0.823769  | 0.85064   |
| 6             |                         | 5.484239  | -0.022336 | 0.006243  |
| 6             |                         | 4.759376  | -0.866026 | -0.836658 |
| 6             |                         | 3.369434  | -0.854476 | -0.848376 |
| 6             |                         | 6.99067   | -0.006654 | -0.013128 |
| 6             |                         | -1.503928 | -2.54723  | -0.029929 |
| 6             |                         | -2.529644 | -2.859681 | -0.921177 |
| 6             |                         | -3.116091 | -4.119399 | -0.876416 |
| 6             |                         | -2.688294 | -5.069218 | 0.047155  |
| 6             |                         | -1.671657 | -4.749051 | 0.941014  |
| 6             |                         | -1.085143 | -3.488404 | 0.910056  |
| 6             |                         | -1.484581 | 2.556646  | 0.031514  |
| 6             |                         | -2.506766 | 2.875752  | 0.924412  |
| 6             |                         | -3.083065 | 4.140274  | 0.882513  |
| 6             |                         | -2.648584 | 5.088184  | -0.039878 |
| 6             |                         | -1.635465 | 4.761434  | -0.935372 |
| 6             |                         | -1.059079 | 3.496073  | -0.90719  |
| 1             |                         | 0.987678  | 2.130799  | 0.100751  |
| 1             |                         | 0.97196   | -2.140371 | -0.09522  |
| 1             |                         | 2.846843  | 1.468373  | 1.555388  |
| 1             |                         | 5.298076  | 1.481721  | 1.530677  |
| 1             |                         | 5.290316  | -1.535637 | -1.507932 |
| 1             |                         | 2.839321  | -1.49851  | -1.544068 |
| 1             |                         | 7.367036  | 0.72312   | -0.738543 |
| 1             |                         | 7.398647  | 0.263411  | 0.964362  |
| 1             |                         | 7.395872  | -0.983131 | -0.290683 |
| 1             |                         | -2.858596 | -2.115872 | -1.63572  |
| 1             |                         | -3.91238  | -4.359243 | -1.573577 |
| 1             |                         | -3.150685 | -6.050408 | 0.075429  |
| 1             |                         | -1.342644 | -5.474501 | 1.677995  |
| 1             |                         | -0.321206 | -3.224077 | 1.634065  |
| 1             |                         | -2.841121 | 2.13328   | 1.637804  |
| 1             |                         | -3.876657 | 4.385334  | 1.580934  |
| 1             |                         | -3.103083 | 6.073117  | -0.065959 |
| 1             |                         | -1.301361 | 5.485538  | -1.671385 |
| 1             |                         | -0.297878 | 3.226764  | -1.632244 |

**Table S11.** Calculated low frequencies for the optimized structure of **DAI-Tol** at  $S_0$  state

| Low Frequencies: |         |         |        |        |        |
|------------------|---------|---------|--------|--------|--------|
| -2.0216          | -0.1932 | 0.0004  | 0.0005 | 0.0006 | 1.3985 |
| 7.4507           | 18.6696 | 36.6391 |        |        |        |

**Table S12.** Calculated electronic transitions for the optimized structure of **DAI-Tol** at  $S_0$  state

| Excited State | Spin Multiplicity | Energy / eV | Wavelength / nm | f      | Composition      | Coefficient |
|---------------|-------------------|-------------|-----------------|--------|------------------|-------------|
| 1             | Singlet-A         | 3.6532      | 339.39          | 0.4117 | HOMO -> LUMO     | 0.693       |
| 2             | Singlet-A         | 4.9592      | 250.01          | 0.0126 | HOMO-5 -> LUMO+1 | -0.24119    |
|               |                   |             |                 |        | HOMO-1 -> LUMO+2 | -0.19718    |
|               |                   |             |                 |        | HOMO-1 -> LUMO+3 | 0.13394     |
|               |                   |             |                 |        | HOMO -> LUMO+2   | 0.52267     |
|               |                   |             |                 |        | HOMO -> LUMO+3   | -0.25785    |
| 3             | Singlet-A         | 5.0798      | 244.07          | 0.6838 | HOMO-2 -> LUMO   | 0.23115     |
|               |                   |             |                 |        | HOMO -> LUMO+1   | 0.62471     |
| 4             | Singlet-A         | 5.1543      | 240.55          | 0.064  | HOMO-1 -> LUMO   | 0.68001     |
| 5             | Singlet-A         | 5.1874      | 239.01          | 0.0037 | HOMO-4 -> LUMO+1 | 0.10887     |
|               |                   |             |                 |        | HOMO-4 -> LUMO+6 | 0.15231     |
|               |                   |             |                 |        | HOMO-4 -> LUMO+8 | 0.1023      |
|               |                   |             |                 |        | HOMO-3 -> LUMO   | 0.36696     |
|               |                   |             |                 |        | HOMO-3 -> LUMO+7 | -0.11329    |
|               |                   |             |                 |        | HOMO-3 -> LUMO+9 | 0.11451     |
|               |                   |             |                 |        | HOMO-2 -> LUMO+5 | -0.26359    |
|               |                   |             |                 |        | HOMO-1 -> LUMO+4 | -0.17356    |
|               |                   |             |                 |        | HOMO -> LUMO+2   | 0.11215     |
|               |                   |             |                 |        | HOMO -> LUMO+4   | -0.34353    |
| 6             | Singlet-A         | 5.1961      | 238.61          | 0.0054 | HOMO-4 -> LUMO   | -0.33885    |
|               |                   |             |                 |        | HOMO-4 -> LUMO+7 | 0.11678     |
|               |                   |             |                 |        | HOMO-4 -> LUMO+9 | -0.12183    |
|               |                   |             |                 |        | HOMO-3 -> LUMO+1 | -0.10219    |
|               |                   |             |                 |        | HOMO-3 -> LUMO+6 | -0.16322    |
|               |                   |             |                 |        | HOMO-2 -> LUMO   | -0.18212    |
|               |                   |             |                 |        | HOMO-2 -> LUMO+4 | 0.24364     |
|               |                   |             |                 |        | HOMO-1 -> LUMO+5 | 0.19612     |
|               |                   |             |                 |        | HOMO -> LUMO+5   | 0.35169     |
| 7             | Singlet-A         | 5.2803      | 234.8           | 0.0033 | HOMO-4 -> LUMO   | -0.16329    |
|               |                   |             |                 |        | HOMO-2 -> LUMO   | 0.60872     |
|               |                   |             |                 |        | HOMO -> LUMO+1   | -0.21712    |
| 8             | Singlet-A         | 5.5068      | 225.15          | 0.0052 | HOMO-3 -> LUMO   | -0.11366    |
|               |                   |             |                 |        | HOMO -> LUMO+2   | 0.31092     |
|               |                   |             |                 |        | HOMO -> LUMO+3   | 0.53027     |
|               |                   |             |                 |        | HOMO -> LUMO+4   | 0.12143     |
|               |                   |             |                 |        | HOMO -> LUMO+11  | -0.17665    |
| 9             | Singlet-A         | 5.6817      | 218.22          | 0.0003 | HOMO-5 -> LUMO   | 0.63589     |
|               |                   |             |                 |        | HOMO-4 -> LUMO   | 0.25238     |
|               |                   |             |                 |        | HOMO -> LUMO+6   | -0.10963    |
| 10            | Singlet-A         | 5.686       | 218.05          | 0.0831 | HOMO-3 -> LUMO   | 0.46198     |
|               |                   |             |                 |        | HOMO -> LUMO+2   | -0.11198    |
|               |                   |             |                 |        | HOMO -> LUMO+4   | 0.41141     |
|               |                   |             |                 |        | HOMO -> LUMO+7   | 0.17502     |
|               |                   |             |                 |        | HOMO -> LUMO+9   | -0.14462    |
| 11            | Singlet-A         | 5.7171      | 216.87          | 0.0001 | HOMO-5 -> LUMO   | -0.2636     |
|               |                   |             |                 |        | HOMO-4 -> LUMO   | 0.3433      |
|               |                   |             |                 |        | HOMO-2 -> LUMO   | 0.12044     |
|               |                   |             |                 |        | HOMO -> LUMO+5   | 0.37697     |
|               |                   |             |                 |        | HOMO -> LUMO+6   | -0.31547    |
|               |                   |             |                 |        | HOMO -> LUMO+8   | -0.10208    |

|                 |           |        |        |        |                  |          |
|-----------------|-----------|--------|--------|--------|------------------|----------|
| 12              | Singlet-A | 5.746  | 215.77 | 0.023  | HOMO-4 -> LUMO   | 0.34828  |
|                 |           |        |        |        | HOMO -> LUMO+5   | 0.15262  |
|                 |           |        |        |        | HOMO -> LUMO+6   | 0.48027  |
|                 |           |        |        |        | HOMO -> LUMO+8   | 0.19029  |
| 13              | Singlet-A | 5.7768 | 214.63 | 0.0278 | HOMO-3 -> LUMO   | -0.2599  |
|                 |           |        |        |        | HOMO-3 -> LUMO+4 | -0.10599 |
|                 |           |        |        |        | HOMO-2 -> LUMO+6 | -0.10147 |
|                 |           |        |        |        | HOMO -> LUMO+7   | 0.40032  |
|                 |           |        |        |        | HOMO -> LUMO+8   | 0.13761  |
|                 |           |        |        |        | HOMO -> LUMO+9   | -0.37654 |
| 14              | Singlet-A | 5.8954 | 210.31 | 0.0147 | HOMO-7 -> LUMO   | 0.16495  |
|                 |           |        |        |        | HOMO-6 -> LUMO   | 0.63842  |
| 15              | Singlet-A | 6.033  | 205.51 | 0.0008 | HOMO -> LUMO+6   | -0.23564 |
|                 |           |        |        |        | HOMO -> LUMO+7   | -0.13416 |
|                 |           |        |        |        | HOMO -> LUMO+8   | 0.38554  |
|                 |           |        |        |        | HOMO -> LUMO+10  | -0.3843  |
|                 |           |        |        |        | HOMO -> LUMO+12  | -0.1566  |
|                 |           |        |        |        | HOMO -> LUMO+15  | -0.13424 |
| 16              | Singlet-A | 6.039  | 205.31 | 0.0255 | HOMO-6 -> LUMO+2 | 0.19297  |
|                 |           |        |        |        | HOMO-5 -> LUMO+1 | 0.362    |
|                 |           |        |        |        | HOMO-3 -> LUMO   | 0.12711  |
|                 |           |        |        |        | HOMO-2 -> LUMO+5 | 0.10461  |
|                 |           |        |        |        | HOMO-1 -> LUMO+2 | 0.17932  |
|                 |           |        |        |        | HOMO-1 -> LUMO+4 | 0.14786  |
|                 |           |        |        |        | HOMO -> LUMO+2   | 0.23205  |
|                 |           |        |        |        | HOMO -> LUMO+3   | -0.24075 |
|                 |           |        |        |        | HOMO -> LUMO+7   | 0.12715  |
|                 |           |        |        |        | HOMO -> LUMO+8   | 0.10413  |
|                 |           |        |        |        | HOMO -> LUMO+20  | -0.10038 |
| 17              | Singlet-A | 6.1637 | 201.15 | 0.0138 | HOMO -> LUMO+4   | 0.13806  |
|                 |           |        |        |        | HOMO -> LUMO+7   | -0.18411 |
|                 |           |        |        |        | HOMO -> LUMO+8   | 0.23812  |
|                 |           |        |        |        | HOMO -> LUMO+10  | 0.40644  |
|                 |           |        |        |        | HOMO -> LUMO+12  | -0.23597 |
|                 |           |        |        |        | HOMO -> LUMO+16  | 0.1577   |
| 18              | Singlet-A | 6.1725 | 200.87 | 0.0239 | HOMO-6 -> LUMO+4 | 0.12945  |
|                 |           |        |        |        | HOMO-5 -> LUMO+1 | 0.16852  |
|                 |           |        |        |        | HOMO-4 -> LUMO+6 | 0.11284  |
|                 |           |        |        |        | HOMO-3 -> LUMO   | -0.14898 |
|                 |           |        |        |        | HOMO-3 -> LUMO+7 | -0.13412 |
|                 |           |        |        |        | HOMO-3 -> LUMO+9 | 0.12402  |
|                 |           |        |        |        | HOMO-2 -> LUMO+5 | -0.16702 |
|                 |           |        |        |        | HOMO-1 -> LUMO+3 | -0.11709 |
|                 |           |        |        |        | HOMO-1 -> LUMO+4 | -0.13032 |
|                 |           |        |        |        | HOMO -> LUMO+3   | -0.12966 |
|                 |           |        |        |        | HOMO -> LUMO+4   | 0.31114  |
|                 |           |        |        |        | HOMO -> LUMO+7   | -0.15553 |
|                 |           |        |        |        | HOMO -> LUMO+8   | -0.15351 |
|                 |           |        |        |        | HOMO -> LUMO+10  | -0.19619 |
| HOMO -> LUMO+12 | 0.10611   |        |        |        |                  |          |
| 19              | Singlet-A | 6.2078 | 199.72 | 0.0365 | HOMO-6 -> LUMO+5 | 0.17561  |
|                 |           |        |        |        | HOMO-4 -> LUMO   | -0.16935 |

|    |           |        |        |        |                  |          |
|----|-----------|--------|--------|--------|------------------|----------|
|    |           |        |        |        | HOMO-4 -> LUMO+7 | -0.15341 |
|    |           |        |        |        | HOMO-4 -> LUMO+9 | 0.16322  |
|    |           |        |        |        | HOMO-3 -> LUMO+6 | 0.18003  |
|    |           |        |        |        | HOMO-3 -> LUMO+8 | 0.11077  |
|    |           |        |        |        | HOMO-2 -> LUMO+4 | -0.22243 |
|    |           |        |        |        | HOMO-1 -> LUMO+5 | -0.17049 |
|    |           |        |        |        | HOMO -> LUMO+5   | 0.38835  |
|    |           |        |        |        | HOMO -> LUMO+10  | -0.21052 |
| 20 | Singlet-A | 6.2349 | 198.86 | 0.0022 | HOMO-6 -> LUMO+4 | 0.11662  |
|    |           |        |        |        | HOMO-2 -> LUMO+5 | -0.13793 |
|    |           |        |        |        | HOMO-1 -> LUMO+2 | 0.13346  |
|    |           |        |        |        | HOMO-1 -> LUMO+3 | 0.1719   |
|    |           |        |        |        | HOMO -> LUMO+4   | 0.14535  |
|    |           |        |        |        | HOMO -> LUMO+7   | 0.29967  |
|    |           |        |        |        | HOMO -> LUMO+9   | 0.42609  |
|    |           |        |        |        | HOMO -> LUMO+14  | -0.11646 |

**Table S13.** Optimized geometry of **DAI-3Ph** at  $S_1$  state

| Atomic Number | Coordinates (Angstroms) |           |           |           |
|---------------|-------------------------|-----------|-----------|-----------|
|               | x                       | y         | z         |           |
| 5             |                         | -1.749762 | 0.005983  | -0.000812 |
| 9             |                         | -2.539261 | 0.143418  | -1.142307 |
| 9             |                         | -2.543388 | -0.124948 | 1.138575  |
| 7             |                         | -0.867531 | -1.284082 | -0.118576 |
| 7             |                         | -0.857233 | 1.288741  | 0.119328  |
| 6             |                         | 0.489059  | 1.203388  | 0.21136   |
| 6             |                         | 1.180375  | -0.006131 | 0.00237   |
| 6             |                         | 0.479625  | -1.209932 | -0.20772  |
| 6             |                         | 2.641148  | -0.011489 | 0.00322   |
| 6             |                         | 3.378557  | 0.943251  | 0.729774  |
| 6             |                         | 4.763626  | 0.930812  | 0.732769  |
| 6             |                         | 5.484115  | -0.022104 | 0.006065  |
| 6             |                         | 4.758028  | -0.972774 | -0.717732 |
| 6             |                         | 3.372771  | -0.973346 | -0.719484 |
| 6             |                         | 6.987593  | -0.008164 | -0.017526 |
| 6             |                         | -1.488967 | -2.53407  | -0.033822 |
| 6             |                         | -2.854522 | -2.672682 | -0.35844  |
| 6             |                         | -3.464334 | -3.914224 | -0.299284 |
| 6             |                         | -2.750004 | -5.047576 | 0.088412  |
| 6             |                         | -1.406559 | -4.916611 | 0.431996  |
| 6             |                         | -0.779518 | -3.681223 | 0.378043  |
| 6             |                         | -1.468155 | 2.543823  | 0.03351   |
| 6             |                         | -2.833393 | 2.693499  | 0.354557  |
| 6             |                         | -3.432858 | 3.940016  | 0.294346  |
| 6             |                         | -2.708247 | 5.067655  | -0.090925 |
| 6             |                         | -1.365011 | 4.92583   | -0.430992 |
| 6             |                         | -0.748256 | 3.685321  | -0.375956 |
| 1             |                         | 1.036295  | 2.11329   | 0.402166  |
| 1             |                         | 1.019567  | -2.124438 | -0.397232 |
| 1             |                         | 2.860387  | 1.680199  | 1.332857  |
| 1             |                         | 5.299509  | 1.672104  | 1.318676  |
| 1             |                         | 5.289547  | -1.723981 | -1.29491  |
| 1             |                         | 2.850435  | -1.710812 | -1.318297 |
| 1             |                         | 7.357308  | 0.626001  | -0.83131  |
| 1             |                         | 7.397431  | 0.385674  | 0.915885  |

|   |           |           |           |
|---|-----------|-----------|-----------|
| 1 | 7.393621  | -1.010638 | -0.173654 |
| 1 | -3.417965 | -1.807431 | -0.677979 |
| 1 | -4.513499 | -3.998115 | -0.564008 |
| 1 | -3.236413 | -6.01635  | 0.132485  |
| 1 | -0.842683 | -5.782596 | 0.764337  |
| 1 | 0.248538  | -3.600658 | 0.708896  |
| 1 | -3.404759 | 1.832763  | 0.672201  |
| 1 | -4.482004 | 4.032374  | 0.556316  |
| 1 | -3.186582 | 6.040402  | -0.135829 |
| 1 | -0.793168 | 5.787318  | -0.761402 |
| 1 | 0.279992  | 3.596526  | -0.704078 |

**Table S14.** Calculated low frequencies for the optimized structure of **DAI-Tol** at S<sub>1</sub> state

| Low Frequencies: |         |         |        |        |        |
|------------------|---------|---------|--------|--------|--------|
| -15.1884         | -2.3573 | -0.0009 | 0.0004 | 0.0007 | 5.7106 |
| 21.3749          | 29.7196 | 34.5613 |        |        |        |

**Table S15.** Calculated electronic transitions for the optimized structure of **DAI-Tol** at S<sub>1</sub> state

| Excited State | Spin Multiplicity | Energy / eV | Wavelength / nm | f      | Composition     | Coefficient |
|---------------|-------------------|-------------|-----------------|--------|-----------------|-------------|
| 1             | Singlet-A         | 2.8703      | 431.96          | 0.4147 | HOMO -><br>LUMO | 0.69761     |

**DAI-Bn****Table S16.** Optimized geometry of **DAI-Bn** at  $S_0$  state

| Atomic Number | Coordinates (Angstroms) |           |           |
|---------------|-------------------------|-----------|-----------|
|               | x                       | y         | z         |
| 9             | 0.030728                | -2.856047 | -0.446496 |
| 9             | -0.003378               | -2.396899 | -2.67736  |
| 7             | -1.25482                | -0.956913 | -1.197728 |
| 7             | 1.23433                 | -0.915798 | -1.229472 |
| 6             | -0.053023               | 2.487747  | -0.37079  |
| 6             | -0.036963               | 1.049577  | -0.724303 |
| 6             | 1.163147                | 0.362079  | -0.917543 |
| 1             | 2.104893                | 0.899567  | -0.820388 |
| 6             | 3.421891                | -1.529931 | -0.198264 |
| 6             | 0.837367                | 3.010449  | 0.573597  |
| 1             | 1.530955                | 2.347014  | 1.081978  |
| 6             | -0.979274               | 4.719048  | -0.621523 |
| 1             | -1.698525               | 5.378654  | -1.099667 |
| 6             | -0.082085               | 5.242403  | 0.310518  |
| 6             | -1.218509               | 0.321809  | -0.882772 |
| 1             | -2.17431                | 0.818341  | -0.724243 |
| 6             | -3.3734                 | -1.651319 | -0.069541 |
| 6             | -0.959496               | 3.372219  | -0.964869 |
| 1             | -1.648311               | 3.007606  | -1.721472 |
| 6             | 0.82655                 | 4.361613  | 0.899309  |
| 1             | 1.527856                | 4.734252  | 1.641147  |
| 6             | 4.673136                | -0.91673  | -0.208092 |
| 1             | 5.025772                | -0.429461 | -1.113456 |
| 6             | -2.864485               | -2.258518 | 1.082248  |
| 1             | -1.872983               | -2.700478 | 1.053387  |
| 6             | 2.981812                | -2.157265 | 0.971089  |
| 1             | 2.006841                | -2.635618 | 0.980287  |
| 6             | -4.646048               | -1.085164 | -0.030646 |
| 1             | -5.052282               | -0.614173 | -0.922099 |
| 6             | 5.034647                | -1.55113  | 2.088744  |
| 1             | 5.65894                 | -1.561001 | 2.976568  |
| 6             | -2.559082               | -1.625246 | -1.343801 |
| 1             | -2.34991                | -2.640891 | -1.68354  |
| 1             | -3.126027               | -1.132156 | -2.139926 |
| 6             | 5.479497                | -0.927654 | 0.929154  |
| 1             | 6.45249                 | -0.447071 | 0.905864  |
| 6             | 3.782988                | -2.165647 | 2.10606   |
| 1             | 3.432525                | -2.657451 | 3.0081    |
| 6             | -0.077268               | 6.710335  | 0.650163  |
| 1             | 0.600708                | 7.264606  | -0.008388 |
| 1             | 0.253903                | 6.879985  | 1.678034  |
| 1             | -1.072549               | 7.148406  | 0.539094  |
| 6             | 2.555554                | -1.531377 | -1.438057 |
| 1             | 3.068258                | -1.012785 | -2.254404 |
| 1             | 2.372315                | -2.553122 | -1.774404 |
| 6             | -5.405739               | -1.122235 | 1.137607  |
| 1             | -6.395806               | -0.677561 | 1.152377  |
| 6             | -4.892444               | -1.725237 | 2.279533  |
| 1             | -5.479932               | -1.754766 | 3.191688  |
| 6             | -3.619248               | -2.29291  | 2.248062  |
| 1             | -3.215162               | -2.768172 | 3.136431  |
| 5             | 0.002094                | -1.817946 | -1.402633 |

**Table S17.** Calculated low frequencies for the optimized structure of **DAI-Tol** at  $S_0$  state

| Low Frequencies: |         |         |        |        |        |
|------------------|---------|---------|--------|--------|--------|
| -1.4036          | 0.0006  | 0.0007  | 0.0008 | 1.4809 | 2.6743 |
| 12.2454          | 18.2543 | 21.2157 |        |        |        |

**Table S18.** Calculated electronic transitions for the optimized structure of **DAI-Tol** at  $S_0$  state

| Excited State | Spin Multiplicity | Energy / eV | Wavelength / nm | f      | Composition      | Coefficient |
|---------------|-------------------|-------------|-----------------|--------|------------------|-------------|
| 1             | Singlet-A         | 3.8693      | 320.43          | 0.2556 | HOMO-6 -> LUMO   | -0.11051    |
|               |                   |             |                 |        | HOMO -> LUMO     | 0.69154     |
| 2             | Singlet-A         | 4.9633      | 249.8           | 0.0143 | HOMO-6 -> LUMO+4 | 0.13692     |
|               |                   |             |                 |        | HOMO-4 -> LUMO+1 | 0.16437     |
|               |                   |             |                 |        | HOMO-4 -> LUMO+3 | -0.18498    |
|               |                   |             |                 |        | HOMO -> LUMO+1   | 0.12464     |
|               |                   |             |                 |        | HOMO -> LUMO+2   | -0.19759    |
|               |                   |             |                 |        | HOMO -> LUMO+4   | 0.51707     |
|               |                   |             |                 |        | HOMO -> LUMO+6   | 0.12605     |
|               |                   |             |                 |        | HOMO -> LUMO+7   | 0.18847     |
| 3             | Singlet-A         | 5.11        | 242.63          | 0.4323 | HOMO -> LUMO+1   | 0.49519     |
|               |                   |             |                 |        | HOMO -> LUMO+3   | -0.41606    |
|               |                   |             |                 |        | HOMO -> LUMO+5   | 0.12982     |

**Table S19.** Optimized geometry of **DAI-Tol** at  $S_1$  state

| Atomic Number | Coordinates (Angstroms) |           |           |
|---------------|-------------------------|-----------|-----------|
|               | x                       | y         | z         |
| 9             | 0.125413                | -2.831846 | -0.392513 |
| 9             | 0.114409                | -2.396878 | -2.633809 |
| 7             | -1.223233               | -1.006353 | -1.191117 |
| 7             | 1.297544                | -0.881918 | -1.1874   |
| 6             | -0.130515               | 2.447034  | -0.381593 |
| 6             | -0.062277               | 1.050276  | -0.715751 |
| 6             | 1.202827                | 0.411533  | -0.868777 |
| 1             | 2.124914                | 0.97401   | -0.80461  |
| 6             | 3.498171                | -1.427464 | -0.161919 |
| 6             | 1.009263                | 3.159927  | 0.072409  |
| 1             | 1.951052                | 2.644694  | 0.206978  |
| 6             | -1.399859               | 4.521048  | -0.161638 |
| 1             | -2.343608               | 5.049845  | -0.255796 |
| 6             | -0.265939               | 5.213527  | 0.28344   |
| 6             | -1.259732               | 0.296212  | -0.897593 |
| 1             | -2.229373               | 0.731277  | -0.69372  |
| 6             | -3.336691               | -1.745948 | -0.099423 |
| 6             | -1.341969               | 3.1784    | -0.483052 |
| 1             | -2.238075               | 2.692655  | -0.845522 |
| 6             | 0.93524                 | 4.500692  | 0.397646  |
| 1             | 1.825115                | 5.010912  | 0.753932  |
| 6             | 4.751227                | -0.81912  | -0.192475 |
| 1             | 5.098567                | -0.351957 | -1.110609 |
| 6             | -2.824413               | -2.262582 | 1.094039  |
| 1             | -1.804666               | -2.635612 | 1.112804  |
| 6             | 3.062472                | -2.026727 | 1.023327  |
| 1             | 2.084588                | -2.498535 | 1.047858  |



|   |           |           |           |
|---|-----------|-----------|-----------|
| 6 | -4.644182 | -1.265255 | -0.123273 |
| 1 | -5.051139 | -0.863652 | -1.047929 |
| 6 | 5.12578   | -1.407817 | 2.114831  |
| 1 | 5.756039  | -1.402181 | 2.998578  |
| 6 | -2.481123 | -1.726314 | -1.351454 |
| 1 | -2.229804 | -2.744706 | -1.653428 |
| 1 | -3.051656 | -1.275603 | -2.175359 |
| 6 | 5.565203  | -0.810125 | 0.939377  |
| 1 | 6.540453  | -0.334769 | 0.89975   |
| 6 | 3.871308  | -2.015742 | 2.152923  |
| 1 | 3.524229  | -2.486476 | 3.067567  |
| 6 | -0.329303 | 6.679003  | 0.601937  |
| 1 | -0.105457 | 7.276233  | -0.289842 |
| 1 | 0.398729  | 6.952856  | 1.369394  |
| 1 | -1.323795 | 6.970035  | 0.948728  |
| 6 | 2.620767  | -1.455811 | -1.398785 |
| 1 | 3.123372  | -0.916136 | -2.21359  |
| 1 | 2.473942  | -2.483489 | -1.73615  |
| 6 | -5.436223 | -1.30123  | 1.023451  |
| 1 | -6.454035 | -0.925088 | 0.989212  |
| 6 | -4.92039  | -1.816019 | 2.206987  |
| 1 | -5.533292 | -1.844708 | 3.102406  |
| 6 | -3.611549 | -2.296262 | 2.238381  |
| 1 | -3.204678 | -2.702126 | 3.15944   |
| 5 | 0.08029   | -1.809697 | -1.364334 |

**Table S20.** Calculated low frequencies for the optimized structure of **DAI-Tol** at  $S_1$  state

| Low Frequencies: |         |         |         |        |        |
|------------------|---------|---------|---------|--------|--------|
| -4.5381          | -2.8024 | -0.0007 | -0.0003 | 0.0001 | 4.0479 |
| 11.6641          | 16.177  | 22.7233 |         |        |        |

**Table S21.** Calculated electronic transitions for the optimized structure of **DAI-Tol** at  $S_1$  state

| Excited State | Spin Multiplicity | Energy / eV | Wavelength / nm | f      | Composition         | Coefficient |
|---------------|-------------------|-------------|-----------------|--------|---------------------|-------------|
| 1             | Singlet-A         | 3.3177      | 373.71          | 0.1557 | HOMO -><br>LUMO     | 0.69767     |
| 2             | Singlet-A         | 4.4532      | 278.42          | 0.5182 | HOMO -><br>LUMO+1   | 0.67151     |
|               |                   |             |                 |        | HOMO -> LUMO+2      | 0.10326     |
| 3             | Singlet-A         | 4.7762      | 259.59          | 0.0759 | HOMO-6 -> LUMO      | 0.11902     |
|               |                   |             |                 |        | HOMO-6 -><br>LUMO+8 | 0.10283     |
|               |                   |             |                 |        | HOMO-3 -><br>LUMO+1 | 0.25243     |
|               |                   |             |                 |        | HOMO -> LUMO+6      | -0.13901    |
|               |                   |             |                 |        | HOMO -> LUMO+7      | 0.20163     |
|               |                   |             |                 |        | HOMO -> LUMO+8      | 0.55682     |

**DAI-2Ph****Table S22.** Optimized geometry of **DAI-2Ph** at  $S_0$  state

| Atomic Number | Coordinates (Angstroms) |           |           |           |
|---------------|-------------------------|-----------|-----------|-----------|
|               | x                       | y         | z         |           |
| 5             |                         | 0.000005  | -0.18648  | 0.000252  |
| 9             |                         | 0.107624  | -0.983367 | 1.139069  |
| 9             |                         | -0.10759  | -0.984011 | -1.138102 |
| 7             |                         | -1.262547 | 0.729203  | 0.088517  |
| 7             |                         | 1.262533  | 0.729187  | -0.088502 |
| 6             |                         | 1.19525   | 2.049778  | -0.078295 |
| 6             |                         | 0.000004  | 2.752861  | -0.000041 |
| 6             |                         | -1.195252 | 2.049795  | 0.0782    |
| 1             |                         | 0.000008  | 3.833126  | -0.000085 |
| 6             |                         | -2.555014 | 0.109203  | 0.078683  |
| 6             |                         | -2.854435 | -0.902379 | 0.990268  |
| 6             |                         | -4.116725 | -1.485025 | 0.976887  |
| 6             |                         | -5.081994 | -1.067141 | 0.064863  |
| 6             |                         | -4.775117 | -0.064535 | -0.84928  |
| 6             |                         | -3.512068 | 0.517704  | -0.849661 |
| 6             |                         | 2.555005  | 0.109187  | -0.078784 |
| 6             |                         | 2.85438   | -0.902327 | -0.990457 |
| 6             |                         | 4.116676  | -1.484965 | -0.977188 |
| 6             |                         | 5.08199   | -1.067138 | -0.065185 |
| 6             |                         | 4.775158  | -0.064597 | 0.849044  |
| 6             |                         | 3.512106  | 0.517636  | 0.849533  |
| 1             |                         | 2.137483  | 2.588373  | -0.142388 |
| 1             |                         | -2.137485 | 2.588404  | 0.14215   |
| 1             |                         | -2.098672 | -1.223794 | 1.695536  |
| 1             |                         | -4.346438 | -2.270346 | 1.689725  |
| 1             |                         | -6.065061 | -1.526388 | 0.061345  |
| 1             |                         | -5.513041 | 0.256351  | -1.577421 |
| 1             |                         | -3.257857 | 1.270091  | -1.589288 |
| 1             |                         | 2.098578  | -1.223703 | -1.695699 |
| 1             |                         | 4.346357  | -2.270234 | -1.690093 |
| 1             |                         | 6.06506   | -1.526379 | -0.061752 |
| 1             |                         | 5.513121  | 0.256245  | 1.577165  |
| 1             |                         | 3.257926  | 1.269977  | 1.589218  |

**Table S23.** Calculated low frequencies for the optimized structure of **DAI-2Ph** at  $S_0$  state

| Low Frequencies: |         |         |        |        |       |
|------------------|---------|---------|--------|--------|-------|
| -1.4415          | -0.0003 | -0.0003 | 0.0004 | 0.4735 | 1.564 |
| 7.6              | 37.8965 | 43.4391 |        |        |       |

**Table S24.** Calculated electronic transitions for the optimized structure of **DAI-2Ph** at  $S_0$  state

| Excited State | Spin Multiplicity | Energy / eV | Wavelength / nm | f      | Composition      | Coefficient |
|---------------|-------------------|-------------|-----------------|--------|------------------|-------------|
| 1             | Singlet-A         | 3.9195      | 316.33          | 0.5631 | HOMO -> LUMO     | 0.69339     |
| 2             | Singlet-A         | 5.224       | 237.33          | 0.0016 | HOMO-4 ->        | -0.14089    |
|               |                   |             |                 |        | LUMO+2           |             |
|               |                   |             |                 |        | HOMO-3 -> LUMO+4 | -0.22249    |
|               |                   |             |                 |        | HOMO-2 -> LUMO   | 0.39461     |
|               |                   |             |                 |        | HOMO-2 -> LUMO+6 | -0.17439    |
|               |                   |             |                 |        | HOMO-1 -> LUMO+3 | -0.27856    |
|               |                   |             |                 |        | HOMO -> LUMO+2   | 0.37031     |
| 3             | Singlet-A         | 5.2293      | 237.09          | 0.0013 | HOMO-4 ->        | -0.14726    |

|    |           |        |        |        | LUMO+3           |          |
|----|-----------|--------|--------|--------|------------------|----------|
|    |           |        |        |        | HOMO-3 -> LUMO   | 0.3713   |
|    |           |        |        |        | HOMO-3 -> LUMO+6 | -0.18342 |
|    |           |        |        |        | HOMO-2 -> LUMO+4 | -0.22204 |
|    |           |        |        |        | HOMO-1 -> LUMO   | -0.17023 |
|    |           |        |        |        | HOMO-1 -> LUMO+2 | -0.27086 |
|    |           |        |        |        | HOMO -> LUMO+3   | 0.3609   |
| 4  | Singlet-A | 5.2832 | 234.67 | 0.0794 | HOMO-3 -> LUMO   | 0.17931  |
|    |           |        |        |        | HOMO-1 -> LUMO   | 0.65547  |
| 5  | Singlet-A | 5.641  | 219.79 | 0.0048 | HOMO-5 -> LUMO   | -0.1069  |
|    |           |        |        |        | HOMO-4 -> LUMO   | 0.65589  |
|    |           |        |        |        | HOMO-2 -> LUMO   | -0.11983 |
| 6  | Singlet-A | 5.6523 | 219.35 | 0.0156 | HOMO-4 -> LUMO+1 | 0.11877  |
|    |           |        |        |        | HOMO -> LUMO+1   | 0.64261  |
|    |           |        |        |        | HOMO -> LUMO+7   | 0.17359  |
| 7  | Singlet-A | 5.7812 | 214.46 | 0.0655 | HOMO-4 -> LUMO   | 0.11926  |
|    |           |        |        |        | HOMO-2 -> LUMO   | 0.54149  |
|    |           |        |        |        | HOMO-2 -> LUMO+6 | 0.11488  |
|    |           |        |        |        | HOMO-1 -> LUMO+3 | 0.13848  |
|    |           |        |        |        | HOMO -> LUMO+2   | -0.37807 |
| 8  | Singlet-A | 5.7995 | 213.78 | 0.0074 | HOMO-3 -> LUMO   | 0.54675  |
|    |           |        |        |        | HOMO-3 -> LUMO+6 | 0.12969  |
|    |           |        |        |        | HOMO-1 -> LUMO   | -0.11276 |
|    |           |        |        |        | HOMO-1 -> LUMO+2 | 0.15811  |
|    |           |        |        |        | HOMO -> LUMO+3   | -0.35836 |
| 9  | Singlet-A | 5.8731 | 211.1  | 0.0333 | HOMO-3 -> LUMO+2 | 0.15991  |
|    |           |        |        |        | HOMO-2 -> LUMO+3 | 0.16049  |
|    |           |        |        |        | HOMO-1 -> LUMO+6 | -0.20367 |
|    |           |        |        |        | HOMO -> LUMO+4   | 0.58919  |
|    |           |        |        |        | HOMO -> LUMO+5   | 0.14018  |
| 10 | Singlet-A | 5.9233 | 209.32 | 0.036  | HOMO-3 -> LUMO+3 | 0.16654  |
|    |           |        |        |        | HOMO-2 -> LUMO+2 | 0.17515  |
|    |           |        |        |        | HOMO-1 -> LUMO+4 | -0.1901  |
|    |           |        |        |        | HOMO -> LUMO+6   | 0.58359  |
|    |           |        |        |        | HOMO -> LUMO+7   | 0.11242  |
| 11 | Singlet-A | 6.2371 | 198.79 | 0.0009 | HOMO-1 -> LUMO+1 | -0.17149 |
|    |           |        |        |        | HOMO -> LUMO+4   | -0.17783 |
|    |           |        |        |        | HOMO -> LUMO+5   | 0.55861  |
|    |           |        |        |        | HOMO -> LUMO+8   | -0.17044 |
|    |           |        |        |        | HOMO -> LUMO+9   | 0.20456  |
| 12 | Singlet-A | 6.3039 | 196.68 | 0.0108 | HOMO-4 -> LUMO+2 | 0.22534  |
|    |           |        |        |        | HOMO-3 -> LUMO+4 | 0.19894  |
|    |           |        |        |        | HOMO-2 -> LUMO   | 0.1319   |
|    |           |        |        |        | HOMO-2 -> LUMO+6 | 0.22758  |
|    |           |        |        |        | HOMO-1 -> LUMO+3 | 0.15805  |
|    |           |        |        |        | HOMO-1 -> LUMO+4 | -0.11046 |
|    |           |        |        |        | HOMO -> LUMO+1   | -0.11118 |
|    |           |        |        |        | HOMO -> LUMO+2   | 0.36     |
|    |           |        |        |        | HOMO -> LUMO+7   | 0.2428   |
|    |           |        |        |        | HOMO -> LUMO+11  | 0.18635  |
|    |           |        |        |        | HOMO -> LUMO+15  | -0.1087  |
| 13 | Singlet-A | 6.4145 | 193.29 | 0.0352 | HOMO-4 -> LUMO+1 | 0.25374  |

|    |           |        |        |        | LUMO+3           |          |
|----|-----------|--------|--------|--------|------------------|----------|
|    |           |        |        |        | HOMO-3 -> LUMO   | 0.11085  |
|    |           |        |        |        | HOMO-3 -> LUMO+6 | 0.25639  |
|    |           |        |        |        | HOMO-2 -> LUMO+4 | 0.26187  |
|    |           |        |        |        | HOMO-1 -> LUMO+2 | 0.18358  |
|    |           |        |        |        | HOMO -> LUMO+3   | 0.44281  |
| 14 | Singlet-A | 6.4662 | 191.74 | 0.0146 | HOMO-17 -> LUMO  | -0.10146 |
|    |           |        |        |        | HOMO-7 -> LUMO   | 0.1229   |
|    |           |        |        |        | HOMO-5 -> LUMO   | 0.53655  |
|    |           |        |        |        | HOMO-1 -> LUMO+5 | -0.13283 |
|    |           |        |        |        | HOMO -> LUMO+7   | -0.28671 |
| 15 | Singlet-A | 6.5003 | 190.74 | 0.0229 | HOMO-5 -> LUMO   | 0.32378  |
|    |           |        |        |        | HOMO-4 -> LUMO+1 | 0.13917  |
|    |           |        |        |        | HOMO-4 -> LUMO+2 | -0.12182 |
|    |           |        |        |        | HOMO-3 -> LUMO+4 | -0.11662 |
|    |           |        |        |        | HOMO-2 -> LUMO+6 | -0.10165 |
|    |           |        |        |        | HOMO-1 -> LUMO+3 | -0.13037 |
|    |           |        |        |        | HOMO-1 -> LUMO+5 | 0.18229  |
|    |           |        |        |        | HOMO -> LUMO+2   | -0.16638 |
|    |           |        |        |        | HOMO -> LUMO+6   | -0.17354 |
|    |           |        |        |        | HOMO -> LUMO+7   | 0.39629  |
| 16 | Singlet-A | 6.5612 | 188.97 | 0.124  | HOMO-4 -> LUMO+4 | -0.23421 |
|    |           |        |        |        | HOMO-3 -> LUMO+2 | 0.35807  |
|    |           |        |        |        | HOMO-2 -> LUMO+3 | 0.36075  |
|    |           |        |        |        | HOMO-1 -> LUMO+1 | 0.10408  |
|    |           |        |        |        | HOMO-1 -> LUMO+6 | -0.20008 |
|    |           |        |        |        | HOMO -> LUMO+4   | -0.24092 |
|    |           |        |        |        | HOMO -> LUMO+5   | -0.1702  |
| 17 | Singlet-A | 6.5693 | 188.73 | 0.2455 | HOMO-5 -> LUMO   | -0.11281 |
|    |           |        |        |        | HOMO-4 -> LUMO+6 | -0.21545 |
|    |           |        |        |        | HOMO-3 -> LUMO+3 | 0.36547  |
|    |           |        |        |        | HOMO-2 -> LUMO+2 | 0.36174  |
|    |           |        |        |        | HOMO-1 -> LUMO+4 | -0.18688 |
|    |           |        |        |        | HOMO -> LUMO+6   | -0.28137 |
| 18 | Singlet-A | 6.5817 | 188.38 | 0.0503 | HOMO -> LUMO+8   | 0.45064  |
|    |           |        |        |        | HOMO -> LUMO+9   | 0.42401  |
|    |           |        |        |        | HOMO -> LUMO+12  | 0.23721  |
| 19 | Singlet-A | 6.7    | 185.05 | 0.0431 | HOMO-4 -> LUMO+5 | 0.19134  |
|    |           |        |        |        | HOMO-1 -> LUMO+1 | 0.15831  |
|    |           |        |        |        | HOMO-1 -> LUMO+7 | -0.24629 |
|    |           |        |        |        | HOMO -> LUMO+5   | -0.12366 |
|    |           |        |        |        | HOMO -> LUMO+8   | -0.33491 |
|    |           |        |        |        | HOMO -> LUMO+9   | 0.4145   |
| 20 | Singlet-A | 6.8229 | 181.72 | 0.0234 | HOMO-3 -> LUMO+4 | -0.19613 |
|    |           |        |        |        | HOMO-3 -> LUMO+5 | 0.28371  |
|    |           |        |        |        | HOMO-2 -> LUMO+1 | 0.35997  |
|    |           |        |        |        | HOMO-2 -> LUMO+7 | -0.2154  |
|    |           |        |        |        | HOMO-1 -> LUMO+5 | -0.20533 |
|    |           |        |        |        | HOMO -> LUMO+11  | 0.28167  |
|    |           |        |        |        | HOMO -> LUMO+15  | -0.13903 |

**Table S25.** Optimized geometry of **DAI-2Ph** at  $S_1$  state

| Atomic Number | Coordinates (Angstroms) |           |           |           |
|---------------|-------------------------|-----------|-----------|-----------|
|               | x                       | y         | z         |           |
| 5             |                         | 0.000026  | -0.133724 | 0.000148  |
| 9             |                         | -0.143912 | -0.925239 | -1.139612 |
| 9             |                         | 0.143953  | -0.925389 | 1.139802  |
| 7             |                         | 1.295038  | 0.745455  | -0.132514 |
| 7             |                         | -1.295    | 0.745463  | 0.13296   |
| 6             |                         | -1.209122 | 2.105241  | 0.203471  |
| 6             |                         | 0.000055  | 2.764181  | 0.000249  |
| 6             |                         | 1.209204  | 2.105345  | -0.203107 |
| 1             |                         | -0.000006 | 3.847742  | 0.000288  |
| 6             |                         | 2.53635   | 0.128717  | -0.074447 |
| 6             |                         | 2.660456  | -1.256486 | -0.341173 |
| 6             |                         | 3.900196  | -1.867266 | -0.307878 |
| 6             |                         | 5.051868  | -1.139589 | -0.003839 |
| 6             |                         | 4.940692  | 0.220851  | 0.28085   |
| 6             |                         | 3.708682  | 0.851539  | 0.252044  |
| 6             |                         | -2.536417 | 0.128736  | 0.074589  |
| 6             |                         | -2.66066  | -1.256355 | 0.341624  |
| 6             |                         | -3.90041  | -1.867112 | 0.307989  |
| 6             |                         | -5.051932 | -1.139478 | 0.003329  |
| 6             |                         | -4.940552 | 0.220845  | -0.281735 |
| 6             |                         | -3.708518 | 0.851516  | -0.252621 |
| 1             |                         | -2.101105 | 2.664464  | 0.44619   |
| 1             |                         | 2.101112  | 2.664489  | -0.446259 |
| 1             |                         | 1.781802  | -1.830833 | -0.597204 |
| 1             |                         | 3.970672  | -2.927784 | -0.526789 |
| 1             |                         | 6.020476  | -1.627671 | 0.019764  |
| 1             |                         | 5.823394  | 0.794544  | 0.544892  |
| 1             |                         | 3.648925  | 1.895054  | 0.532238  |
| 1             |                         | -1.78209  | -1.830615 | 0.598134  |
| 1             |                         | -3.971014 | -2.927574 | 0.52714   |
| 1             |                         | -6.020552 | -1.627519 | -0.020533 |
| 1             |                         | -5.823116 | 0.79451   | -0.546313 |
| 1             |                         | -3.648624 | 1.894927  | -0.533177 |

**Table S26.** Calculated low frequencies for the optimized structure of **DAI-2Ph** at S<sub>1</sub> state

| Low Frequencies: |         |         |         |         |        |
|------------------|---------|---------|---------|---------|--------|
| -21.0371         | -2.3042 | -0.001  | -0.0006 | -0.0002 | 3.1219 |
| 20.6223          | 48.5862 | 70.1019 |         |         |        |

**Table S27.** Calculated electronic transitions for the optimized structure of **DAI-2Ph** at S<sub>1</sub> state

| Excited State | Spin Multiplicity | Energy / eV | Wavelength / nm | f      | Composition         | Coefficient |
|---------------|-------------------|-------------|-----------------|--------|---------------------|-------------|
| 1             | Singlet-A         | 3.0022      | 412.98          | 0.5814 | HOMO -><br>LUMO     | 0.69704     |
| 2             | Singlet-A         | 4.2584      | 291.15          | 0.0994 | HOMO-1 -><br>LUMO   | 0.69188     |
| 3             | Singlet-A         | 4.6608      | 266.02          | 0.0047 | HOMO-3 -><br>LUMO+2 | -0.12006    |
|               |                   |             |                 |        | HOMO-3 -><br>LUMO+5 | 0.10396     |
|               |                   |             |                 |        | HOMO-2 -> LUMO      | 0.62063     |
|               |                   |             |                 |        | HOMO-1 -><br>LUMO+4 | 0.15728     |
|               |                   |             |                 |        | HOMO -> LUMO+2      | 0.1611      |

**Table S28.** Optimized geometry of **DAI-2Ph** at FF MECI

| Element | Coordinates (Angstroms) |         |         |
|---------|-------------------------|---------|---------|
|         | x                       | y       | z       |
| B       | 0.1233                  | 0.6796  | 1.0223  |
| F       | 0.2135                  | -0.4367 | 1.871   |
| F       | 0.465                   | 1.8581  | 1.7298  |
| N       | 0.862                   | 0.5046  | -0.3046 |
| N       | -1.393                  | 0.9453  | 0.4844  |
| C       | -1.4206                 | 2.205   | -0.2068 |
| C       | -0.5773                 | 2.1869  | -1.3435 |
| C       | 0.4972                  | 1.3133  | -1.3663 |
| H       | -0.6764                 | 2.9235  | -2.115  |
| C       | 2.1702                  | -0.0735 | -0.3138 |
| C       | 2.3277                  | -1.4417 | -0.0963 |
| C       | 3.5997                  | -2.0097 | -0.1083 |
| C       | 4.7192                  | -1.2172 | -0.347  |
| C       | 4.5608                  | 0.1479  | -0.5609 |
| C       | 3.3012                  | 0.7172  | -0.5361 |
| C       | -2.3146                 | 0.0028  | 0.1712  |
| C       | -2.148                  | -1.3545 | 0.5688  |
| C       | -3.0984                 | -2.2961 | 0.2194  |
| C       | -4.2328                 | -1.933  | -0.515  |
| C       | -4.4186                 | -0.6049 | -0.8841 |
| C       | -3.494                  | 0.3541  | -0.5458 |
| H       | -1.7159                 | 3.0756  | 0.3402  |
| H       | 1.148                   | 1.2964  | -2.2171 |
| H       | 1.4616                  | -2.0447 | 0.0824  |
| H       | 3.7128                  | -3.0631 | 0.0622  |
| H       | 5.6987                  | -1.6551 | -0.3599 |
| H       | 5.4204                  | 0.7675  | -0.7314 |
| H       | 3.1848                  | 1.7759  | -0.6669 |
| H       | -1.2921                 | -1.6345 | 1.1391  |
| H       | -2.9606                 | -3.3162 | 0.5192  |
| H       | -4.9642                 | -2.672  | -0.7766 |
| H       | -5.2998                 | -0.3191 | -1.4244 |
| H       | -3.6681                 | 1.3776  | -0.8034 |

**DKI-4Ph****Table S29.** Optimized geometry of **DKI-4Ph** at  $S_0$  state

| Atomic Number | Coordinates (Angstroms) |           |           |
|---------------|-------------------------|-----------|-----------|
|               | x                       | y         | z         |
| 6             | -1.214818               | 0.764378  | -0.02089  |
| 6             | -2.447437               | 1.592314  | 0.101501  |
| 6             | -3.317399               | 1.4325    | 1.178094  |
| 6             | -2.704644               | 2.584965  | -0.840824 |
| 6             | -3.825383               | 3.39414   | -0.7193   |
| 6             | -4.427064               | 2.252831  | 1.306152  |
| 6             | -4.687485               | 3.231218  | 0.355487  |
| 1             | -2.030696               | 2.714221  | -1.679249 |
| 1             | -4.023017               | 4.154044  | -1.465676 |
| 1             | -3.123708               | 0.667498  | 1.918625  |
| 1             | -5.093006               | 2.125017  | 2.150894  |
| 1             | -5.56008                | 3.865712  | 0.453726  |
| 6             | 0.004598                | 1.437373  | -0.095246 |
| 6             | 1.226083                | 0.766958  | -0.092426 |
| 6             | 2.464522                | 1.5937    | -0.125517 |
| 7             | 1.275086                | -0.560878 | -0.078065 |
| 1             | 0.003054                | 2.514776  | -0.107933 |
| 7             | -1.263709               | -0.561327 | -0.028036 |
| 6             | 2.63782                 | 2.626428  | 0.792543  |
| 6             | 3.427326                | 1.390564  | -1.112568 |
| 6             | 4.544343                | 2.207943  | -1.17666  |
| 6             | 3.76579                 | 3.432751  | 0.737181  |
| 6             | 4.719941                | 3.226529  | -0.248784 |
| 1             | 3.298003                | 0.594174  | -1.834011 |
| 1             | 5.282357                | 2.046882  | -1.953036 |
| 1             | 1.892129                | 2.789431  | 1.561412  |
| 1             | 3.897161                | 4.224376  | 1.464973  |
| 1             | 5.598373                | 3.858857  | -0.295974 |
| 6             | -2.511643               | -1.274518 | -0.068604 |
| 6             | -3.3412                 | -1.162724 | -1.176771 |
| 6             | -2.858227               | -2.115896 | 0.980284  |
| 6             | -4.052206               | -2.820939 | 0.929971  |
| 6             | -4.53492                | -1.86669  | -1.219886 |
| 6             | -4.895421               | -2.694546 | -0.165369 |
| 1             | -2.183571               | -2.222947 | 1.818772  |
| 1             | -4.320412               | -3.476353 | 1.749859  |
| 1             | -3.043884               | -0.531261 | -2.0042   |
| 1             | -5.179622               | -1.775375 | -2.085673 |
| 1             | -5.826082               | -3.247867 | -0.202241 |
| 6             | 2.503447                | -1.276734 | 0.124042  |
| 5             | 0.003006                | -1.440484 | -0.238307 |
| 6             | 3.242513                | -1.08514  | 1.284619  |
| 6             | 2.921279                | -2.20557  | -0.821256 |
| 6             | 4.093146                | -2.918406 | -0.612969 |
| 6             | 4.415871                | -1.796202 | 1.483832  |
| 6             | 4.846967                | -2.712493 | 0.534235  |
| 1             | 2.317491                | -2.369626 | -1.70388  |
| 1             | 4.41576                 | -3.641256 | -1.352688 |
| 1             | 2.893861                | -0.383481 | 2.031723  |
| 1             | 4.988883                | -1.640446 | 2.389983  |
| 1             | 5.761353                | -3.271275 | 0.693057  |
| 9             | 0.032804                | -2.464853 | 0.701952  |
| 9             | -0.03656                | -1.975774 | -1.533003 |

**Table S30.** Calculated low frequencies for the optimized structure of **DKI-4Ph** at  $S_0$  state

| Low Frequencies: |         |         |        |        |        |
|------------------|---------|---------|--------|--------|--------|
| -2.3062          | -0.0005 | -0.0003 | 0.0005 | 0.6921 | 2.3004 |
| 13.0848          | 21.5414 | 45.7098 |        |        |        |

**Table S31.** Calculated electronic transitions for the optimized structure of **DKI-4Ph** at  $S_0$  state

| Excited State | Spin Multiplicity | Energy / eV | Wavelength / nm | f      | Composition      | Coefficient |
|---------------|-------------------|-------------|-----------------|--------|------------------|-------------|
| 1             | Singlet-A         | 3.6734      | 337.52          | 0.6122 | HOMO -> LUMO     | 0.68736     |
| 2             | Singlet-A         | 4.3841      | 282.81          | 0.2496 | HOMO-1 -> LUMO   | 0.67933     |
| 3             | Singlet-A         | 4.7612      | 260.4           | 0.1057 | HOMO-4 -> LUMO   | 0.1755      |
|               |                   |             |                 |        | HOMO-2 -> LUMO   | 0.62808     |
|               |                   |             |                 |        | HOMO-1 -> LUMO+1 | 0.175       |
| 4             | Singlet-A         | 5.0398      | 246.01          | 0.0018 | HOMO-5 -> LUMO   | 0.11571     |
|               |                   |             |                 |        | HOMO-4 -> LUMO+6 | 0.16666     |
|               |                   |             |                 |        | HOMO-3 -> LUMO   | 0.45887     |
|               |                   |             |                 |        | HOMO-2 -> LUMO+8 | -0.10512    |
|               |                   |             |                 |        | HOMO-1 -> LUMO+5 | 0.16346     |
|               |                   |             |                 |        | HOMO-1 -> LUMO+9 | -0.14085    |
|               |                   |             |                 |        | HOMO -> LUMO+1   | -0.27249    |
|               |                   |             |                 |        | HOMO -> LUMO+6   | -0.10839    |
|               |                   |             |                 |        | HOMO -> LUMO+8   | 0.1445      |
| 5             | Singlet-A         | 5.1008      | 243.07          | 0.0159 | HOMO-7 -> LUMO   | 0.13021     |
|               |                   |             |                 |        | HOMO-7 -> LUMO+3 | -0.14002    |
|               |                   |             |                 |        | HOMO-6 -> LUMO+1 | 0.2497      |
|               |                   |             |                 |        | HOMO-5 -> LUMO   | 0.45936     |
|               |                   |             |                 |        | HOMO-5 -> LUMO+3 | 0.11225     |
|               |                   |             |                 |        | HOMO-2 -> LUMO+2 | 0.14134     |
|               |                   |             |                 |        | HOMO-1 -> LUMO+3 | -0.15689    |
|               |                   |             |                 |        | HOMO -> LUMO+1   | 0.16159     |
| 6             | Singlet-A         | 5.1009      | 243.06          | 0.001  | HOMO-6 -> LUMO   | 0.10984     |
|               |                   |             |                 |        | HOMO-4 -> LUMO   | 0.50132     |
|               |                   |             |                 |        | HOMO-4 -> LUMO+5 | -0.10591    |
|               |                   |             |                 |        | HOMO-3 -> LUMO+6 | 0.18453     |
|               |                   |             |                 |        | HOMO-2 -> LUMO+9 | 0.13336     |
|               |                   |             |                 |        | HOMO-1 -> LUMO+6 | -0.10346    |
|               |                   |             |                 |        | HOMO-1 -> LUMO+8 | 0.18433     |
|               |                   |             |                 |        | HOMO -> LUMO+5   | 0.17219     |
|               |                   |             |                 |        | HOMO -> LUMO+9   | -0.13489    |
| 7             | Singlet-A         | 5.1103      | 242.61          | 0.007  | HOMO-8 -> LUMO+3 | 0.10509     |
|               |                   |             |                 |        | HOMO-7 -> LUMO+2 | 0.11076     |
|               |                   |             |                 |        | HOMO-6 -> LUMO   | 0.49332     |
|               |                   |             |                 |        | HOMO-5 -> LUMO+1 | 0.2537      |
|               |                   |             |                 |        | HOMO-4 -> LUMO   | -0.11994    |
|               |                   |             |                 |        | HOMO-2 -> LUMO+3 | -0.18581    |
|               |                   |             |                 |        | HOMO-1 -> LUMO+2 | 0.15241     |
| 8             | Singlet-A         | 5.1974      | 238.55          | 0.0008 | HOMO-5 -> LUMO   | -0.12935    |
|               |                   |             |                 |        | HOMO-3 -> LUMO   | 0.30959     |
|               |                   |             |                 |        | HOMO-2 -> LUMO+1 | 0.11057     |



|    |           |        |        |        |                     |          |
|----|-----------|--------|--------|--------|---------------------|----------|
|    |           |        |        |        | HOMO -> LUMO+1      | 0.58127  |
| 9  | Singlet-A | 5.4406 | 227.89 | 0.0438 | HOMO-8 -><br>LUMO+1 | -0.1297  |
|    |           |        |        |        | HOMO-7 -> LUMO      | 0.45101  |
|    |           |        |        |        | HOMO-5 -> LUMO      | -0.15873 |
|    |           |        |        |        | HOMO-4 -> LUMO+6    | -0.11674 |
|    |           |        |        |        | HOMO-3 -> LUMO      | 0.2291   |
|    |           |        |        |        | HOMO-1 -> LUMO+5    | -0.11156 |
|    |           |        |        |        | HOMO-1 -> LUMO+9    | 0.14042  |
|    |           |        |        |        | HOMO -> LUMO+1      | -0.15777 |
|    |           |        |        |        | HOMO -> LUMO+6      | 0.17473  |
|    |           |        |        |        | HOMO -> LUMO+8      | -0.14197 |
| 10 | Singlet-A | 5.4944 | 225.65 | 0.0043 | HOMO-8 -><br>LUMO   | 0.26005  |
|    |           |        |        |        | HOMO-4 -> LUMO      | 0.37879  |
|    |           |        |        |        | HOMO-3 -> LUMO+6    | -0.1309  |
|    |           |        |        |        | HOMO-2 -> LUMO      | -0.18203 |
|    |           |        |        |        | HOMO-1 -> LUMO+1    | 0.1468   |
|    |           |        |        |        | HOMO-1 -> LUMO+8    | -0.17587 |
|    |           |        |        |        | HOMO -> LUMO+5      | -0.25769 |
|    |           |        |        |        | HOMO -> LUMO+9      | 0.13923  |
| 11 | Singlet-A | 5.5347 | 224.01 | 0.0368 | HOMO-7 -><br>LUMO   | -0.18333 |
|    |           |        |        |        | HOMO-3 -> LUMO      | 0.13753  |
|    |           |        |        |        | HOMO-1 -> LUMO+3    | 0.14     |
|    |           |        |        |        | HOMO -> LUMO+2      | 0.59333  |
|    |           |        |        |        | HOMO -> LUMO+8      | -0.10688 |
| 12 | Singlet-A | 5.6304 | 220.2  | 0.0094 | HOMO-8 -><br>LUMO   | -0.16877 |
|    |           |        |        |        | HOMO-1 -> LUMO+2    | 0.19762  |
|    |           |        |        |        | HOMO-1 -> LUMO+6    | -0.10813 |
|    |           |        |        |        | HOMO -> LUMO+3      | 0.54241  |
|    |           |        |        |        | HOMO -> LUMO+5      | 0.13973  |
|    |           |        |        |        | HOMO -> LUMO+9      | 0.17168  |
| 13 | Singlet-A | 5.638  | 219.91 | 0.04   | HOMO-7 -><br>LUMO   | 0.31708  |
|    |           |        |        |        | HOMO-5 -> LUMO      | -0.19899 |
|    |           |        |        |        | HOMO-3 -> LUMO      | -0.30233 |
|    |           |        |        |        | HOMO-1 -> LUMO+5    | 0.16209  |
|    |           |        |        |        | HOMO-1 -> LUMO+9    | -0.12293 |
|    |           |        |        |        | HOMO -> LUMO+2      | 0.2423   |
|    |           |        |        |        | HOMO -> LUMO+6      | -0.14988 |
|    |           |        |        |        | HOMO -> LUMO+8      | 0.18498  |
| 14 | Singlet-A | 5.6833 | 218.15 | 0.0989 | HOMO-8 -><br>LUMO   | 0.4957   |
|    |           |        |        |        | HOMO-7 -> LUMO+1    | -0.14599 |
|    |           |        |        |        | HOMO-6 -> LUMO      | 0.18847  |
|    |           |        |        |        | HOMO-6 -> LUMO+3    | -0.1038  |
|    |           |        |        |        | HOMO-2 -> LUMO      | 0.15111  |
|    |           |        |        |        | HOMO-1 -> LUMO+1    | -0.18758 |
|    |           |        |        |        | HOMO -> LUMO+3      | 0.18266  |
|    |           |        |        |        | HOMO -> LUMO+5      | 0.14676  |
| 15 | Singlet-A | 5.7629 | 215.14 | 0.0449 | HOMO-3 -><br>LUMO+5 | -0.11047 |
|    |           |        |        |        | HOMO-1 -> LUMO+3    | -0.10056 |
|    |           |        |        |        | HOMO-1 -> LUMO+9    | -0.12462 |
|    |           |        |        |        | HOMO-1 ->           | 0.10744  |

|    |           |        |        |        |                  |          |
|----|-----------|--------|--------|--------|------------------|----------|
|    |           |        |        |        | LUMO+15          |          |
|    |           |        |        |        | HOMO -> LUMO+2   | 0.15602  |
|    |           |        |        |        | HOMO -> LUMO+6   | 0.51668  |
|    |           |        |        |        | HOMO -> LUMO+8   | 0.1933   |
| 16 | Singlet-A | 5.8508 | 211.91 | 0.0639 | HOMO-6 -> LUMO   | 0.11349  |
|    |           |        |        |        | HOMO-2 -> LUMO+3 | 0.12002  |
|    |           |        |        |        | HOMO-1 -> LUMO+6 | 0.14417  |
|    |           |        |        |        | HOMO-1 -> LUMO+8 | 0.12851  |
|    |           |        |        |        | HOMO -> LUMO+3   | 0.35445  |
|    |           |        |        |        | HOMO -> LUMO+5   | -0.28823 |
|    |           |        |        |        | HOMO -> LUMO+7   | 0.26449  |
|    |           |        |        |        | HOMO -> LUMO+9   | -0.27335 |
| 17 | Singlet-A | 5.9205 | 209.41 | 0.0003 | HOMO-2 -> LUMO+2 | 0.10411  |
|    |           |        |        |        | HOMO-1 -> LUMO+3 | -0.16043 |
|    |           |        |        |        | HOMO -> LUMO+4   | 0.58132  |
|    |           |        |        |        | HOMO -> LUMO+6   | -0.12334 |
|    |           |        |        |        | HOMO -> LUMO+12  | 0.16221  |
| 18 | Singlet-A | 5.954  | 208.24 | 0.0194 | HOMO-8 -> LUMO   | -0.23591 |
|    |           |        |        |        | HOMO-7 -> LUMO+2 | -0.10563 |
|    |           |        |        |        | HOMO-6 -> LUMO   | 0.37743  |
|    |           |        |        |        | HOMO-4 -> LUMO+3 | 0.1015   |
|    |           |        |        |        | HOMO-2 -> LUMO+3 | 0.21022  |
|    |           |        |        |        | HOMO-1 -> LUMO+1 | -0.11442 |
|    |           |        |        |        | HOMO-1 -> LUMO+2 | -0.27912 |
|    |           |        |        |        | HOMO-1 -> LUMO+4 | 0.12312  |
|    |           |        |        |        | HOMO-1 -> LUMO+8 | -0.10078 |
|    |           |        |        |        | HOMO -> LUMO+9   | 0.14737  |
| 19 | Singlet-A | 5.9709 | 207.65 | 0.0554 | HOMO-7 -> LUMO   | 0.21131  |
|    |           |        |        |        | HOMO-7 -> LUMO+3 | 0.12338  |
|    |           |        |        |        | HOMO-6 -> LUMO+1 | -0.12786 |
|    |           |        |        |        | HOMO-5 -> LUMO   | 0.38789  |
|    |           |        |        |        | HOMO-2 -> LUMO+2 | -0.19876 |
|    |           |        |        |        | HOMO-2 -> LUMO+4 | 0.12799  |
|    |           |        |        |        | HOMO-1 -> LUMO+3 | 0.25764  |
|    |           |        |        |        | HOMO -> LUMO+4   | 0.21373  |
| 20 | Singlet-A | 5.9778 | 207.41 | 0.0008 | HOMO-8 -> LUMO   | 0.16765  |
|    |           |        |        |        | HOMO-2 -> LUMO+3 | 0.12902  |
|    |           |        |        |        | HOMO-2 -> LUMO+5 | 0.13711  |
|    |           |        |        |        | HOMO-1 -> LUMO+1 | 0.50193  |
|    |           |        |        |        | HOMO-1 -> LUMO+2 | -0.13735 |
|    |           |        |        |        | HOMO -> LUMO+5   | 0.1811   |
|    |           |        |        |        | HOMO -> LUMO+7   | -0.11125 |

**Table S32.** Optimized geometry of **DKI-4Ph** at FF MECI

| Element | Coordinates (Angstroms) |         |         |
|---------|-------------------------|---------|---------|
|         | x                       | y       | z       |
| N       | 0                       | 0       | 0       |
| B       | 1.4978                  | 0       | 0       |
| C       | -0.6653                 | 0       | -1.2581 |
| C       | -0.7287                 | -0.3109 | 1.1867  |
| N       | 1.7309                  | -1.3513 | -1.0857 |

|   |         |         |         |
|---|---------|---------|---------|
| F | 2.1238  | 1.0662  | -0.6526 |
| F | 2.1005  | -0.2708 | 1.2347  |
| C | -0.0435 | -0.4287 | -2.387  |
| C | -2.0278 | 0.5907  | -1.3311 |
| C | -1.6479 | -1.3609 | 1.214   |
| C | -0.5179 | 0.4336  | 2.3495  |
| C | 1.3366  | -0.884  | -2.3818 |
| C | 1.6185  | -2.6594 | -0.7531 |
| H | -0.5229 | -0.2707 | -3.3305 |
| C | -3.027  | 0.003   | -2.1062 |
| C | -2.3127 | 1.7839  | -0.6584 |
| C | -2.3535 | -1.6527 | 2.3778  |
| H | -1.8149 | -1.9424 | 0.3281  |
| C | -1.2098 | 0.1283  | 3.5151  |
| H | 0.1886  | 1.2386  | 2.3334  |
| C | 2.3746  | -0.4391 | -3.2866 |
| C | 1.784   | -3.076  | 0.5936  |
| C | 1.3814  | -3.6439 | -1.7504 |
| C | -4.2803 | 0.5959  | -2.2164 |
| H | -2.8315 | -0.9245 | -2.6099 |
| C | -3.5628 | 2.3735  | -0.772  |
| H | -1.5516 | 2.2431  | -0.06   |
| C | -2.1353 | -0.9125 | 3.5346  |
| H | -3.0644 | -2.4573 | 2.3784  |
| H | -1.0339 | 0.7078  | 4.4013  |
| C | 2.0811  | 0.3839  | -4.3902 |
| C | 3.7028  | -0.866  | -3.1177 |
| C | 1.6797  | -4.415  | 0.9156  |
| H | 1.982   | -2.3464 | 1.3469  |
| C | 1.2782  | -4.9685 | -1.405  |
| H | 1.3031  | -3.344  | -2.7737 |
| C | -4.5512 | 1.7785  | -1.5533 |
| H | -5.0393 | 0.1268  | -2.8131 |
| H | -3.7667 | 3.2921  | -0.2561 |
| H | -2.6764 | -1.1391 | 4.4332  |
| C | 3.0682  | 0.7514  | -5.2801 |
| H | 1.085   | 0.7514  | -4.5321 |
| C | 4.6934  | -0.4793 | -4.0102 |
| H | 3.9615  | -1.4935 | -2.2882 |
| C | 1.4219  | -5.3638 | -0.0754 |
| H | 1.7974  | -4.7236 | 1.935   |
| H | 1.1001  | -5.7036 | -2.1646 |
| H | -5.519  | 2.2347  | -1.636  |
| C | 4.3806  | 0.3263  | -5.0989 |
| H | 2.8215  | 1.3839  | -6.1111 |
| H | 5.7034  | -0.8075 | -3.8559 |
| H | 1.3463  | -6.4014 | 0.1842  |
| H | 5.1449  | 0.6226  | -5.7909 |

**Table S33.** Optimized geometry of **DKI-4Ph** at PC MECI

| Element | Coordinates (Angstroms) |         |         |
|---------|-------------------------|---------|---------|
|         | x                       | y       | z       |
| N       | 1.2598                  | -0.5005 | -0.1663 |
| B       | -0.0072                 | -1.3902 | -0.294  |
| C       | 1.1854                  | 0.8955  | -0.1591 |
| C       | 2.4787                  | -1.1447 | -0.0157 |

|   |         |         |         |
|---|---------|---------|---------|
| N | -1.2947 | -0.5775 | -0.1051 |
| F | 0.0688  | -2.4195 | 0.6968  |
| F | -0.0498 | -2.0265 | -1.5802 |
| C | -0.088  | 1.474   | -0.0799 |
| C | 2.3724  | 1.6675  | -0.2152 |
| C | 3.6072  | -0.4078 | 0.5591  |
| C | 2.688   | -2.429  | -0.5437 |
| C | -1.2754 | 0.7568  | -0.0301 |
| C | -2.5153 | -1.336  | -0.2176 |
| H | -0.1646 | 2.537   | -0.0773 |
| C | 2.4301  | 2.9994  | 0.2924  |
| C | 3.6383  | 0.9715  | -0.5505 |
| C | 4.8812  | -1.1165 | 0.6358  |
| H | 3.3739  | 0.1152  | 1.4716  |
| C | 3.9371  | -3.0086 | -0.494  |
| H | 1.8793  | -2.9448 | -1.0099 |
| C | -2.5407 | 1.5384  | 0.1108  |
| C | -3.29   | -1.2455 | -1.3714 |
| C | -2.8908 | -2.1966 | 0.8068  |
| C | 3.6019  | 3.6815  | 0.4286  |
| H | 1.5234  | 3.4679  | 0.6195  |
| C | 4.8655  | 1.7873  | -0.4253 |
| H | 3.6154  | 0.4477  | -1.4955 |
| C | 5.0532  | -2.3485 | 0.0935  |
| H | 5.6929  | -0.6118 | 1.1232  |
| H | 4.0708  | -3.984  | -0.9199 |
| C | -2.8684 | 2.5105  | -0.8329 |
| C | -3.3785 | 1.35    | 1.2131  |
| C | -4.4557 | -1.991  | -1.4817 |
| H | -2.9734 | -0.6086 | -2.173  |
| C | -4.0585 | -2.9436 | 0.6859  |
| H | -2.2656 | -2.292  | 1.6701  |
| C | 4.8389  | 3.0535  | 0.0418  |
| H | 3.6122  | 4.6786  | 0.8216  |
| H | 5.789   | 1.3406  | -0.7413 |
| H | 6.0054  | -2.8405 | 0.1252  |
| C | -4.0217 | 3.2735  | -0.6852 |
| H | -2.2317 | 2.6633  | -1.6831 |
| C | -4.5224 | 2.1212  | 1.3611  |
| H | -3.135  | 0.6096  | 1.9488  |
| C | -4.8423 | -2.8389 | -0.4493 |
| H | -5.0516 | -1.9181 | -2.3709 |
| H | -4.345  | -3.6071 | 1.4789  |
| H | 5.7514  | 3.6162  | 0.1099  |
| C | -4.8469 | 3.0825  | 0.4079  |
| H | -4.2676 | 4.0114  | -1.4242 |
| H | -5.1572 | 1.973   | 2.213   |
| H | -5.7418 | -3.4175 | -0.5383 |
| H | -5.7352 | 3.6734  | 0.5224  |

**DKI-5Ph****Table S34.** Optimized geometry of **DKI-5Ph** at  $S_0$  state

| Atomic Number | Coordinates (Angstroms) |           |           | z |
|---------------|-------------------------|-----------|-----------|---|
|               | x                       | y         |           |   |
| 5             | 0.010361                | -2.068651 | 0.410747  |   |
| 9             | -0.001836               | -3.241861 | -0.309039 |   |
| 9             | 0.0562                  | -2.316946 | 1.78159   |   |
| 7             | -1.255313               | -1.220982 | 0.077484  |   |
| 7             | 1.253221                | -1.207579 | 0.026691  |   |
| 6             | -1.226426               | 0.114355  | 0.04093   |   |
| 6             | -0.009417               | 0.825733  | 0.052158  |   |
| 6             | 1.213385                | 0.12429   | -0.006571 |   |
| 6             | -2.510988               | 0.863902  | 0.007975  |   |
| 6             | -3.405427               | 0.725398  | 1.071659  |   |
| 1             | -3.161426               | 0.052627  | 1.892325  |   |
| 6             | -4.594297               | 1.445896  | 1.085047  |   |
| 1             | -5.281092               | 1.33778   | 1.9209    |   |
| 6             | -4.905103               | 2.298616  | 0.02858   |   |
| 1             | -5.837085               | 2.858695  | 0.036628  |   |
| 6             | -4.020051               | 2.43265   | -1.038601 |   |
| 1             | -4.258583               | 3.095811  | -1.86651  |   |
| 6             | -2.823952               | 1.723982  | -1.045439 |   |
| 1             | -2.125697               | 1.836267  | -1.873083 |   |
| 6             | -0.019701               | 2.315676  | 0.077506  |   |
| 6             | -0.497851               | 3.000198  | 1.198963  |   |
| 1             | -0.853752               | 2.428668  | 2.055823  |   |
| 6             | -0.528111               | 4.391116  | 1.228761  |   |
| 1             | -0.908438               | 4.904166  | 2.109188  |   |
| 6             | -0.067841               | 5.12296   | 0.136996  |   |
| 1             | -0.087518               | 6.21005   | 0.159323  |   |
| 6             | 0.418443                | 4.453717  | -0.983899 |   |
| 1             | 0.779483                | 5.016241  | -1.842022 |   |
| 6             | 0.437055                | 3.063274  | -1.012731 |   |
| 1             | 0.80986                 | 2.543458  | -1.894951 |   |
| 6             | 2.487678                | 0.882859  | -0.124725 |   |
| 6             | 2.903743                | 1.710727  | 0.919038  |   |
| 1             | 2.289163                | 1.796464  | 1.813799  |   |
| 6             | 4.093153                | 2.422685  | 0.815331  |   |
| 1             | 4.412186                | 3.061696  | 1.63502   |   |
| 6             | 4.869081                | 2.321383  | -0.336861 |   |
| 1             | 5.796689                | 2.882583  | -0.420081 |   |
| 6             | 4.454872                | 1.499748  | -1.382345 |   |
| 1             | 5.057082                | 1.416575  | -2.28377  |   |
| 6             | 3.271428                | 0.777362  | -1.274949 |   |
| 1             | 2.949137                | 0.129223  | -2.088246 |   |
| 6             | -2.472853               | -1.941953 | -0.134676 |   |
| 6             | -2.929721               | -2.819477 | 0.846818  |   |
| 1             | -2.35009                | -2.941633 | 1.758989  |   |
| 6             | -4.116481               | -3.517234 | 0.647345  |   |
| 1             | -4.474336               | -4.196063 | 1.41782   |   |
| 6             | -4.844101               | -3.348297 | -0.528026 |   |
| 1             | -5.77379                | -3.891815 | -0.677906 |   |
| 6             | -4.369089               | -2.490004 | -1.516699 |   |
| 1             | -4.92168                | -2.365636 | -2.444938 |   |
| 6             | -3.179938               | -1.795483 | -1.326681 |   |
| 1             | -2.794915               | -1.133772 | -2.09961  |   |

|   |          |           |           |
|---|----------|-----------|-----------|
| 6 | 2.50545  | -1.907056 | 0.039839  |
| 6 | 3.341121 | -1.82134  | 1.150822  |
| 1 | 3.025119 | -1.231624 | 2.008794  |
| 6 | 4.562273 | -2.486558 | 1.147478  |
| 1 | 5.218055 | -2.411845 | 2.011519  |
| 6 | 4.938863 | -3.251704 | 0.046074  |
| 1 | 5.89396  | -3.771431 | 0.045025  |
| 6 | 4.083436 | -3.361404 | -1.047439 |
| 1 | 4.365497 | -3.971231 | -1.902406 |
| 6 | 2.862635 | -2.694109 | -1.050943 |
| 1 | 2.178116 | -2.774279 | -1.891966 |

**Table S35.** Calculated low frequencies for the optimized structure of **DKI-5Ph** at  $S_0$  state

|                  |         |         |       |        |         |
|------------------|---------|---------|-------|--------|---------|
| Low Frequencies: |         |         |       |        |         |
| -6.3525          | -0.0003 | 0.0005  | 0.001 | 2.6754 | 10.0392 |
| 19.1109          | 24.582  | 28.5323 |       |        |         |

**Table S36.** Calculated electronic transitions for the optimized structure of **DKI-5Ph** at  $S_0$  state

| Excited State | Spin Multiplicity | Energy / eV | Wavelength / nm | f      | Composition       | Coefficient |
|---------------|-------------------|-------------|-----------------|--------|-------------------|-------------|
| 1             | Singlet-A         | 3.7393      | 331.57          | 0.5157 | HOMO -><br>LUMO   | 0.68869     |
| 2             | Singlet-A         | 4.5851      | 270.41          | 0.0334 | HOMO-1 -><br>LUMO | 0.67602     |
| 3             | Singlet-A         | 4.8408      | 256.12          | 0.1156 | HOMO-2 -><br>LUMO | 0.65817     |

## References

- [1] R. Yoshii, A. Hirose, K. Tanaka, Y. Chujo, *J. Am. Chem. Soc.* **2014**, *136*, 18131–18139.
- [2] S. Ito, M. Yaegashi, K. Tanaka, Y. Chujo, *Chem. Eur. J.* **2021**, *27*, 9302–9312.
- [3] M. J. Frisch, G. W. Trucks, H. B. Schlegel, G. E. Scuseria, M. A. Robb, J. R. Cheeseman, G. Scalmani, V. Barone, G. A. Petersson, H. Nakatsuji, X. Li, M. Caricato, A. V. Marenich, J. Bloino, B. G. Janesko, R. Gomperts, B. Mennucci, H. P. Hratchian, J. V. Ortiz, A. F. Izmaylov, J. L. Sonnenberg, D. Williams-Young, F. Ding, F. Lipparini, F. Egidi, J. Goings, B. Peng, A. Petrone, T. Henderson, D. Ranasinghe, V. G. Zakrzewski, J. Gao, N. Rega, G. Zheng, W. Liang, M. Hada, M. Ehara, K. Toyota, R. Fukuda, J. Hasegawa, M. Ishida, T. Nakajima, Y. Honda, O. Kitao, H. Nakai, T. Vreven, K. Throssell, J. A. Montgomery, Jr., J. E. Peralta, F. Ogliaro, M. J. Bearpark, J. J. Heyd, E. N. Brothers, K. N. Kudin, V. N. Staroverov, T. A. Keith, R. Kobayashi, J. Normand, K. Raghavachari, A. P. Rendell, J. C. Burant, S. S. Iyengar, J. Tomasi, M. Cossi, J. M. Millam, M. Klene, C. Adamo, R. Cammi, J. W. Ochterski, R. L. Martin, K. Morokuma, O. Farkas, J. B. Foresman, D. J. Fox, *Gaussian 16 Rev. C.01*, Wallingford, CT, 2016.
- [4] J. Michl, E. W. Thulstrup, *Tetrahedron* **1976**, *32*, 205–209.
- [5] H. Werner, P. J. Knowles, G. Knizia, F. R. Manby, M. Schütz, *Wiley Interdiscip. Rev. Comput. Mol. Sci.* **2012**, *2*, 242–253.
- [6] H.-J. Werner, P. J. Knowles, F. R. Manby, J. A. Black, K. Doll, A. Heßelmann, D. Kats, A. Köhn, T. Korona, D. A. Kreplin, Q. Ma, T. F. Miller, A. Mitrushchenkov, K. A. Peterson, I. Polyak, G. Rauhut, M. Sibaev, *J. Chem. Phys.* **2020**, *152*, 144107.
- [7] H.-J. Werner, P. J. Knowles, G. Knizia, F. R. Manby, M. Schütz, P. Celani, W. Györffy, D. Kats, T. Korona, R. Lindh, A. Mitrushchenkov, G. Rauhut, K. R. Shamasundar, T. B. Adler, R. D. Amos, S. J. Bennie, A. Bernhardsson, A. Berning, D. L. Cooper, M. J. O. Deegan, A. J. Dobbyn, F. Eckert, E. Goll, C. Hampel, A. Hesselmann, G. Hetzer, T. Hrenar, G. Jansen, C. Köppl, S. J. R. Lee, Y. Liu, A. W. Lloyd, Q. Ma, R. A. Mata, A. J. May, S. J. McNicholas, W. Meyer, T. F. M. III, M. E. Mura, A. Nicklass, D. P. O’Neill, P. Palmieri, D. Peng, T. Petrenko, K. Pflüger, R. Pitzer, M. Reiher, T. Shiozaki, H. Stoll, A. J. Stone, R. Tarroni, T. Thorsteinsson, M. Wang, M. Welborn, *Molpro, 2021.2, a Package of Ab Initio Programs*, Stuttgart, DE, 2021.
- [8] K. Momma, F. Izumi, *J. Appl. Crystallogr.* **2011**, *44*, 1272–1276.
